# Supplementary material for: New evidence for upper Permian crustal growth below Eifel, Germany, from mafic granulite xenoliths
Source: Copernicus journal article supplement (doi:10.5194/ejm-33-233-2021), 2021-04-29
Supplement: Supplementary file 1 [file ejm-33-233-2021-supplement.zip]

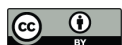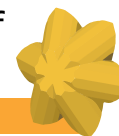

*Supplement of*

**New evidence for upper Permian crustal growth below Eifel, Germany,  
from mafic granulite xenoliths**

**Cliff S. J. Shaw**

*Correspondence to:* Cliff S. J. Shaw (cshaw@unb.ca)

- [ejm-33-233-2021-supplement-title-page.pdf](#)
- [Electronic Appendix S2\\_Clinopyroxene analyses.xlsx](#)
- [Electronic Appendix S3\\_plagioclase analyses.xlsx](#)
- [Electronuic Appendix S1\\_ U-Pb analysis and interpretation of titanite.xls](#)

The copyright of individual parts of the supplement might differ from the article licence.
