# Supplementary material for: New evidence for upper Permian crustal growth below Eifel, Germany, from mafic granulite xenoliths
Source: Copernicus journal article supplement (doi:10.5194/ejm-33-233-2021), 2021-04-29
Supplement: Supplementary file 1 [file Electronic Appendix S2_Clinopyroxene analyses.xlsx]

## Sheet: cpx
Major Oxides (EPMA)																	Trace elements (LA-ICPMS)
Sample	Pt#	SiO[2]	TiO[2]	Al[2]O[3]	Cr[2]O[3]	FeO	MnO	MgO	CaO	Na[2]O	Total	X(mm)	Y(mm)	Z(mm)	xMg		Mg	Si	Ca	Sc	Ti	V	Cr	Co	Ni	Rb	Sr	Y	Zr	Nb	La	Ce	Pr	Nd	Sm	Eu	Gd	Tb	Dy	Ho	Er	Tm	Yb	Lu	Hf
sel 1-11l CIRC 1	1	48.44	0.2968	3.42	0.0563	13.66	0.4717	9.52	21.95	0.7694	98.58	52.0775	37.3075	11.3276	55.3463		33050	149000	96600	44.12	1295	176.6	114.2	10.29	5.57	0.009	29.88	1.38	25.75	0.0065	0.303	0.969	0.161	0.95	0.183	0.11	0.256	0.045	0.292	0.06	0.104	0.0213	0.16	0.047	1.31
sel 1-11l CIRC 1	2	48.68	0.3419	3.56	0.0378	13.71	0.4968	9.37	22.23	0.7899	99.23	53.402	37.1785	11.3276	54.863		34900	155000	102000	46.67	1174	181.3	141.2	10.63	5.34	-0.046	29.89	1.138	21.63	0	0.283	0.811	0.145	0.7	0.228	0.09	0.244	0.032	0.212	0.0275	0.115	0.0106	0.104	0.029	1.39
sel 1-11l CIRC 1	3	49.11	0.3272	3.46	0.0403	13.57	0.5223	9.44	22.1	0.7378	99.31	52.8063	37.769	11.3276	55.3011		37470	169000	111000	48.63	1519	202.2	129.9	11.7	5.84	-0.007	33.95	1.97	30.09	0.0113	0.59	1.9	0.301	1.52	0.43	0.1	0.385	0.051	0.342	0.082	0.233	0.039	0.26	0.04	1.42
sel 1-11l CIRC 1	4	48.95	0.3025	3.07	0.0214	13.73	0.5206	9.64	21.99	0.7563	98.98	52.3408	38.6	11.3255	55.5295		36910	168000	112000	48.74	1624	197.9	116.6	11.54	6.19	0.002	34.69	2.23	32.23	0.0052	0.566	2.2	0.276	1.5	0.298	0.139	0.325	0.052	0.37	0.08	0.23	0.034	0.279	0.069	1.67
sel 1-11l CIRC 1	5	49.27	0.4437	3.84	0.0298	13.94	0.5782	9.13	21.78	0.7893	99.81	52.381	39.7992	11.3255	53.8065		40140	183000	118000	51.43	1642	212.6	144.7	14.44	9.7	0.034	42.63	2.33	35.24	0.0106	1.283	2.95	0.39	1.91	0.46	0.104	0.38	0.078	0.413	0.076	0.22	0.0298	0.38	0.068	1.65
sel 1-11l CIRC 1	7	49.82	0.2664	3.03	0.0422	13.73	0.5696	9.69	22.37	0.7529	100.27	52.475	39.5055	11.3255	55.6572		41080	185000	123000	52.93	1456	213.1	152.6	12.86	6.92	-0.008	34.85	1.763	24.44	0.0048	0.48	1.146	0.144	0.88	0.252	0.073	0.236	0.042	0.239	0.07	0.162	0.029	0.15	0.043	1.46
sel 1-11l CIRC 1	8	49.08	0.4284	3.87	0.0187	14.03	0.584	9.22	21.84	0.7837	99.85	52.93	39.4045	11.3255	53.8903
SEL 1-11L circ 2	9	49.75	0.3742	3.57	0.032	13.93	0.5061	9.47	21.95	0.8227	100.4	62.479	41.5505	11.313	54.7317
SEL 1-11L circ 3	10	49.64	0.3649	3.66	0.0305	13.8	0.5008	9.38	22.28	0.7442	100.4	69.7985	46.8235	11.2979	54.7274		41190	181000	122000	52.8	1641	213.7	125	12.8	6.31	-0.004	35.12	2.78	39.35	0	0.541	1.83	0.322	2.13	0.56	0.121	0.66	0.094	0.607	0.104	0.329	0.0313	0.276	0.065	1.78
SEL 1-11L circ 3	11	50.32	0.2531	3.23	0.0212	13.71	0.5363	9.49	21.86	1.2415	100.67	69.3825	46.709	11.2979	55.178		34780	155000	103000	44.6	1773	186.3	109	11.03	5.86	0.064	31.83	3.07	43.6	0.0045	0.578	2.02	0.43	2.41	0.62	0.151	0.57	0.088	0.547	0.127	0.309	0.037	0.328	0.06	1.72
SEL 1-11L circ 3	12	48.36	0.426	3.76	0.0489	13.83	0.4833	9.34	22.3	0.7681	99.32	70.2033	46.895	11.2932	54.5677		43340	190000	127000	55.42	1501	206.3	122.6	14.02	7.62	-0.013	37.13	2.37	39.65	0	0.683	1.85	0.364	1.66	0.4	0.129	0.53	0.097	0.493	0.093	0.227	0.036	0.268	0.05	1.83
SEL 1-11L circ 3	13	48.62	0.3671	3.58	0.0189	13.71	0.531	9.44	22.67	0.7867	99.72	70.4258	47.193	11.2932	55.0473		60260	255000	168000	78.8	1280	259.4	188.1	17.44	8.93	0.025	46.87	3.95	24.98	0	1.04	3.29	0.582	3	0.72	0.145	1.08	0.112	0.74	0.151	0.425	0.043	0.38	0.122	1.71
SEL 1-11L circ 3	14	49.42	0.2439	2.9176	0.0265	13.62	0.5654	9.65	22.23	0.7227	99.4	70.6728	47.5852	11.2932	55.7536		41040	181000	121000	53.31	1576	202	105.5	13.18	7.25	0.091	40.7	3.17	41.92	0	0.774	2.69	0.512	2.7	0.67	0.113	0.81	0.089	0.525	0.098	0.322	0.029	0.328	0.082	1.85
SEL 1-11L circ 3	15	48.86	0.4214	3.72	0.012	13.73	0.5207	9.51	22.38	0.7367	99.9	70.637	47.8555	11.2932	55.194		48460	209000	139000	61.65	1405	223.6	114.6	13.95	7.75	0.032	41.82	2.32	40.11	0	0.728	2.14	0.375	2.25	0.48	0.076	0.44	0.067	0.392	0.088	0.158	0.027	0.261	0.041	1.82
SEL 1-11L circ 4	16	49.2	0.4374	4.09	0.0303	13.9	0.5734	9.21	22.14	0.8155	100.4	70.3135	37.7392	11.3113	54.0946		38970	173000	115000	51.62	1636	204.5	121.5	12.66	6.07	0.069	36.54	2.26	39.99	0.021	1.13	2.76	0.38	1.98	0.265	0.1	0.46	0.061	0.457	0.1	0.24	0.044	0.201	0.061	1.84
SEL 1-11L circ 4	17	50.75	0.313	3.16	0.0425	13.69	0.513	9.64	22.06	0.8678	101.03	70.2025	37.9872	11.3129	55.6015		35280	158000	106000	47.29	1710	182.4	98.3	11.55	6.85	0.034	35.82	2.67	44.32	0.0091	0.977	2.96	0.502	2.33	0.44	0.141	0.54	0.088	0.596	0.091	0.255	0.048	0.292	0.06	1.71
SEL 1 10-I CIRC 1	18	48.9	0.3082	3.55	0	12.45	0.5285	10.38	21.93	0.8158	98.86	26.5775	34.652	11.2489	59.7224		51440	201000	135000	60.6	1618	313.3	47.5	49.4	64.2	0.032	18.74	42.43	49.25	0.015	0.39	4.17	1.6	14.01	6.23	1.59	8.88	1.52	9.11	1.819	4.49	0.584	3.69	0.529	2.89
SEL 1 10-1 CIRC 1	20	49.67	0.3243	3.67	0	12.76	0.5103	10.34	22.37	0.8633	100.51	25.7353	36.0612	11.2489	59.036		53530	206000	137000	62	1440	297.1	40.5	51.51	63.4	-0.015	17.71	42.06	31.9	0.045	0.499	4.72	1.545	13.59	6.69	1.64	7.81	1.435	9.08	1.85	4.57	0.583	3.9	0.569	2.31
SEL 1 10-1 CIRC 1	21	51.14	0.2287	2.8642	0.0197	11.43	0.4847	11.55	21.9	0.652	100.27	25.3188	35.7112	11.2483	64.2492		65380	254000	169000	77.2	1878	373.2	50.9	63.4	84.7	0.02	24.2	57.72	47.7	0.104	0.738	8.26	2.73	21.17	8.83	2.25	11.54	1.94	12.14	2.5	6.04	0.737	5.49	0.775	3.16
SEL1-10I circ 2	23	51.08	0.2867	3.33	0.0141	11.87	0.454	11.04	22.5	0.7601	101.34	20.3508	39.2245	11.2337	62.3226
SEL 1-10I circ 3	24	50.83	0.3197	3.5	0.0051	12.46	0.5266	10.27	22.24	0.7669	100.92	6.049	36.1227	11.1776	59.4465		42990	169000	114000	49.58	1251	285.1	25.53	44.41	57.3	0.013	13.22	34.54	25.56	0.034	0.691	2.51	0.755	7.59	4.69	1.3	6.5	1.176	7.4	1.491	3.72	0.501	3.22	0.532	1.75
SEL 1-10I circ 3	25	52.56	0.238	2.9693	0.0071	11.76	0.4347	11.38	21.88	0.7032	101.93	5.907	35.9017	11.1776	63.2488		54010	208000	135000	61.5	1427	349.8	34.2	50.55	73.6	0.358	16.91	22.82	22.48	0.451	4.25	12.07	1.406	7.41	3.26	0.781	4.73	0.702	4.89	0.954	2.41	0.324	2.13	0.308	1.77
SEL 1-10I circ 3	26	50.12	0.31	3.4	0.0139	12.23	0.4977	10.68	22.09	0.7723	100.1	5.796	36.2797	11.1742	60.8314		54470	215000	143000	63.5	1752	372.7	35.5	55.5	73.8	0.134	18.66	40.95	37.19	0.76	2.01	8.16	1.182	9.26	5.26	1.63	8.08	1.39	9.03	1.682	4.36	0.562	3.9	0.63	2.79
sel1-13E CIRC 1	31	52.07	0.1688	2.3056	0.0165	12.12	0.3239	11.14	22.94	0.7098	101.79	11.4555	73.6015	11.219	62.0445		41180	163000	109000	17.72	1086	187.5	137.5	32.64	46.5	0.178	34.47	3.21	30.42	0.022	3.34	8.57	1.347	6.28	1.16	0.24	1	0.143	0.73	0.143	0.332	0.049	0.348	0.078	1.96
sel1-13E CIRC 1	32	50.59	0.1331	2.516	0.0212	11.62	0.2907	11.04	22.1	0.6722	98.98	11.472	73.9647	11.219	62.8211		54460	203000	138000	23.46	910	189.2	222.8	37.71	51.4	0.126	39.07	3.33	16.96	0.125	0.927	2.13	0.242	1.35	0.46	0.077	0.58	0.125	0.676	0.116	0.411	0.041	0.356	0.093	1.52
sel1-13E CIRC 1	33	52.45	0.1273	2.0746	0.0171	11.97	0.3505	12.08	22.18	0.6574	101.9	17.2083	69.6597	11.2285	64.2194
SEL1-13E circ 2	34	52.46	0.1335	2.1032	0	11.71	0.3313	11.93	22.06	0.6752	101.4	17.2083	69.6597	11.2285	64.4366		29630	119000	81900	14.76	895	119	17.59	28.7	38.7	0.192	25.94	2.28	22.68	0.076	0.606	1.379	0.178	1.17	0.218	0.119	0.399	0.045	0.459	0.078	0.242	0.0257	0.316	0.067	1.26
SEL1-13E circ 2	35	50.54	0.2823	3.32	0.0128	14.51	0.2931	9.56	21.93	0.7974	101.25	17.558	69.7265	11.2285	53.9542		61200	235000	156000	28.4	1229	197.6	37.2	49.2	62.6	1.84	59.9	3.84	25.62	0.508	4	8.19	0.884	3.77	0.53	0.211	0.75	0.071	0.6	0.154	0.328	0.066	0.55	0.097	1.57
SEL1-13E circ 2	36	50.16	0.4273	4.24	0.0051	13.56	0.297	9.48	22.27	0.8184	101.27	15.6068	69.3705	11.2255	55.4238		60010	246000	166000	27.34	2033	320.7	21.3	57.8	79.9	0.24	46.9	4.3	56.3	0.186	0.557	2.4	0.43	2.29	0.56	0.16	0.72	0.121	0.76	0.179	0.427	0.061	0.5	0.118	2.17
SEL1-13E circ 2	37	51.75	0.2388	2.9429	0.018	12.17	0.3249	11.02	22.76	0.7225	101.95	16.1205	69.2792	11.2247	61.6918		60550	236000	159000	29.04	1169	247.6	34.9	55.6	74.4	0.064	39.54	2.99	28.84	0.0127	0.726	2.08	0.282	1.62	0.41	0.126	0.55	0.089	0.529	0.107	0.315	0.045	0.381	0.079	1.94
SEL 1-13E CIRC 3 TRAV 1 TO END	38	51.47	0.2644	3.32	0.0003	12.15	0.3221	10.74	22.55	0.7602	101.58	20.9753	65.6917	11.2331	61.1209		52500	207000	143000	45.8	1596	200.4	29.6	47.69	50.7	-0.009	34.18	2.77	24.9	0.024	1.34	2.85	0.329	1.65	0.34	0.14	0.4	0.077	0.423	0.08	0.298	0.036	0.329	0.09	1.65
SEL 1-13E CIRC 3 TRAV 1 TO END	39	50.34	0.4188	4.41	0.0056	13.68	0.3429	9.59	22.41	0.8581	102.06	20.9753	65.7602	11.2331	55.4912
SEL 1-13E CIRC 3 TRAV 1 TO END	40	50.08	0.4707	4.78	0.0203	13.37	0.2953	9.4	22.25	0.9089	101.58	20.9753	65.8892	11.2331	55.5631
SEL 1-13E CIRC 3 TRAV 1 TO END	41	53.04	0.1093	1.987	0.0017	11.26	0.3357	11.79	22.8	0.6338	101.95	20.9753	66.0567	11.2331	65.0616
SEL 1-13E CIRC 3 TRAV 1 TO END	42	50.42	0.3835	4.2	0.0041	12.74	0.3218	9.98	22.1	0.8302	100.98	20.9753	66.2215	11.2321	58.2146		82300	321000	221000	70.5	1396	165.9	45.2	67.9	69.8	-0.109	82.9	7.99	20.51	0.081	5.53	12.69	1.58	6.51	1.3	0.415	1.08	0.226	1.46	0.297	0.72	0.094	1.18	0.197	1.28
SEL 1-13E CIRC 3 TRAV 1 TO END	43	50.55	0.3508	3.89	0.0149	12.59	0.309	10.37	22.23	0.7762	101.08	20.9753	66.2875	11.2321	59.4299
SEL 1-13E CIRC 3 TRAV 1 TO END	44	51.76	0.1625	2.3693	0.0147	13.54	0.3034	10.8	21.83	0.6709	101.45	20.9753	66.3462	11.2321	58.6532
SEL 1-13E CIRC 3 TRAV 1 TO END	45	49.78	0.3656	3.68	0.0255	15.31	0.3183	9.14	21.32	0.824	100.76	20.9978	66.3682	11.2321	51.4972		76960	308000	213000	65.3	2117	302.8	77.6	71.5	70.7	-0.088	52.1	4.03	45.8	0	0.66	1.86	0.318	1.43	0.61	0.141	0.72	0.109	0.53	0.134	0.425	0.058	0.47	0.116	2.45
SEL 1-13 H circ 1	2	49.71	0.3251	3.75	0.0111	10.73	0.203	12.61	21.38	0.4697	99.19	13.9276	4.2752	11.2188	67.6383		84200	276000	176000	90.7	1638	283.6	181.2	77.8	147.2	0.45	11.24	18.8	20.05	0.349	2.26	8.98	1.66	9.58	3.77	1.41	4.54	0.757	4.32	0.712	1.76	0.242	1.42	0.22	1.72
SEL 1-13 H circ 1	3	48.58	0.48	4.39	0.0309	9.73	0.094	12.33	22.09	0.5027	98.23	14.1001	4.2752	11.2188	69.2657
SEL1-13 H circ 2	4	48.24	0.4195	4.27	0.0222	9.63	0.0564	12.45	22.07	0.5204	97.69	13.8606	6.593	11.2184	69.6902		74070	247000	163000	73.7	2039	315.9	159.2	68.4	128.5	0.12	10.23	14.85	38.54	0.17	1.48	5.65	1.26	9.52	3.5	1.15	4.43	0.723	3.6	0.6	1.48	0.199	0.9	0.116	2.74
SEL1-13 H circ 2	5	47.39	0.5626	4.86	0.0349	9.84	0.0834	12.04	21.73	0.5756	97.11	13.9593	6.8332	11.2184	68.5147		77690	256000	168000	79.2	2677	381	154.7	75	146.2	0.03	10.04	10.78	51	0.108	1.28	5.76	1.43	10.51	4.68	1.51	4.76	0.681	3.21	0.463	0.89	0.093	0.58	0.06	3.25
SEL1-13 H circ 2	6	47.11	0.5554	4.9	0.0244	9.91	0.1077	12.25	20.78	0.5766	96.21	13.4843	7.2525	11.2153	68.7344		58140	199000	130000	52.93	3059	392.9	151.8	59.8	131.5	-0.039	8.12	9.6	59	0.097	0.349	3.29	1.157	10.34	4.65	1.41	5.28	0.573	2.92	0.421	0.838	0.082	0.43	0.061	2.58
SEL1-13 H circ 2	7	48.79	0.3267	3.53	0.0176	9.78	0.128	12.66	21.53	0.462	97.23	13.2273	7.3038	11.2153	69.717		55500	184000	123000	53.9	1757	255	144	52.7	104.1	0.104	7.04	9.26	36.48	0.065	1.013	3.66	0.814	6.63	3.52	1.07	3.54	0.473	2.55	0.429	0.84	0.107	0.51	0.077	2.27
SEL1-13 H circ 3	10	46.13	0.2479	2.7085	0.029	11.09	0.2572	12.7	20.62	0.4785	94.27	15.6113	15.3102	11.2263	67.069		44750	149000	96300	45.58	1383	237.3	113.7	44.9	87.5	0.074	7.14	5.94	21.22	0.059	1.064	4.13	0.886	6.19	2.6	0.97	2.89	0.328	1.71	0.272	0.491	0.036	0.287	0.031	1.64
SEL1-13 H circ 3	11	48.93	0.304	3.64	0.0307	9.87	0.1329	12.66	21.82	0.4729	97.87	15.7161	15.3558	11.2335	69.5233		65040	214000	139000	64.8	1710	330.1	157.3	64.8	119.9	0.12	10.8	8.92	16.77	0.148	1.95	6	1.18	7.61	3.62	1.17	4.05	0.414	2.51	0.344	0.76	0.091	0.36	0.055	1.63
SEL1-13 H circ 3	12	48.72	0.261	3.07	0.0314	10.22	0.098	12.76	22.25	0.4897	97.89	15.8913	16.3095	11.2334	68.9486		59250	195000	129000	56.1	1562	311.8	131.2	57.9	114.2	0.108	8.96	7.19	28.69	0.046	1.43	5.37	1.185	8.37	3	1.21	3.32	0.383	1.91	0.314	0.54	0.049	0.337	0.038	2.13
SEL1-13 H circ 3	13	47.94	0.4119	4.22	0.0169	10.12	0.081	12.52	21.76	0.6017	97.66	15.8913	16.6378	11.2333	68.7523		74510	245000	159000	71.1	2143	413.2	189.2	75.7	150.6	0.071	12.48	7.34	29.29	0.138	1.117	4.1	1.153	9.39	4.69	1.6	4.71	0.523	2.22	0.278	0.43	0.039	0.351	0.031	2.52
SEL 1-13 H circ 4	14	48.67	0.3594	4.06	0.0409	10.06	0.1781	12.39	22.35	0.4721	98.58	20.3048	16.1025	11.2525	68.6557		59080	199000	129000	57.7	1981	333.8	152.7	58	122	0.33	11.09	6.05	29.6	0.283	0.91	3.46	0.907	7.68	3.79	1.26	4.34	0.555	2.06	0.253	0.425	0.052	0.137	0.0133	2.39
SEL 1-13 H circ 4	15	48.13	0.3948	4.15	0.0223	10.13	0.056	12.51	21.92	0.6292	97.95	20.5001	16.4288	11.2525	68.7139		69920	230000	153000	68.8	1973	339.5	165.4	63.5	135.2	0.025	10.95	9.51	26.32	0.063	1.45	5.49	1.322	8.17	4.03	1.25	4.39	0.528	2.76	0.423	0.78	0.099	0.5	0.075	2.11
SEL 1-13 H circ 4	16	47.32	0.3519	4.51	0.0198	11.82	0.307	11.99	20.49	0.5053	97.31	20.4833	17.006	11.2525	64.3372		72370	239000	155000	73.2	1964	372.8	199.9	68.8	132.3	0.54	14.29	8.87	17.77	0.174	1.71	5.72	1.141	8.52	3.58	1.24	4.58	0.516	2.69	0.389	0.88	0.057	0.373	0.031	1.5
SEL 1-13 H circ 4	17	47.3	0.408	4.35	0.0331	10.06	0.0981	12.26	21.9	0.5542	96.96	20.4708	17.3115	11.2523	68.4283		76530	257000	159000	84.2	1587	294	161.3	66.6	115.9	0.58	12.59	27.39	39.1	0.271	2.11	8.68	1.771	12.22	4.65	1.45	6.02	0.955	5.61	1.069	2.6	0.357	2.36	0.351	1.9
SEL 1-13 H circ 5	18	48.21	0.2186	3.13	0.0231	10.38	0.1805	12.68	21.43	0.4169	96.67	26.6223	16.2818	11.2769	68.4795		58380	193000	129000	60	1339	291.3	174.3	54.6	99.9	0.24	9.84	6.17	26.36	0.096	1.289	4.06	0.781	5.56	2.71	0.953	2.79	0.346	1.66	0.225	0.493	0.034	0.23	0.034	2.1
SEL 1-13 H circ 5	19	48.15	0.1954	2.8314	0.0386	10.93	0.2754	12.76	21.27	0.4032	96.85	26.7061	16.5888	11.2769	67.4927		69500	227000	137000	86	897	209.2	144.4	59.4	89.9	0.212	11.31	41.3	30.09	0.211	1.77	8.43	1.75	11.7	4.69	1.42	7.76	1.338	8.6	1.557	4.03	0.5	3.58	0.4	1.53
SEL 1-13H circ 6	20	48.07	0.2823	3.44	0.0172	9.78	0.0939	12.6	21.9	0.5269	96.7	29.4151	14.5172	11.288	69.6166		63650	211000	139000	63	1637	332.7	143.7	60.7	110.6	0.04	10.86	6.18	29.47	0.113	0.793	3.46	0.855	6.71	3.23	1.02	3.57	0.375	1.78	0.269	0.382	0.045	0.171	0.034	1.72
SEL 1-13H circ 6	21	46.71	0.4981	4.76	0.0358	10.2	0.0718	12.08	21.64	0.6296	96.63	29.1763	14.7695	11.2877	67.807		80150	265000	173000	78.6	2250	447.9	198.8	80.4	152.2	0.002	14.56	9.38	42.12	0.111	1.57	5.4	1.27	9.81	4.67	1.53	4.82	0.717	2.99	0.352	0.69	0.078	0.368	0.035	2.67
SEL1-13H circ 7	22	47.9	0.5181	4.81	0.0215	11.46	0.2233	11.9	20.65	0.5734	98.05	32.1443	11.6422	11.3009	64.8722		78480	258000	166000	79.7	2229	416.3	196.9	78.2	143.3	0.1	15.02	12.53	40	0.166	1.74	6.15	1.3	10.82	4.72	1.56	5.68	0.699	3.45	0.527	0.86	0.126	0.59	0.061	2.84
SEL1-13H circ 7	23	47.59	0.4324	4.04	0.0158	11.42	0.3037	12.27	20.78	0.5298	97.4	32.1021	11.169	11.298	65.6456		57000	192000	120000	70.7	2184	272.3	122.7	50.4	82.6	0.153	10.16	30.4	52.4	0.113	2.63	9.64	1.86	11.64	4.76	1.53	6.32	1.01	5.78	1.153	3.03	0.42	2.53	0.38	2.66
SEL1-10E circ 1	46	48.15	0.3774	3.38	0.0249	11.72	0.4458	10.79	22.5	0.8084	98.21	54.0236	42.4065	11.3309	62.083		60440	238000	155000	65.9	1549	298.5	25.06	51.2	74.7	0.022	17.7	11.65	23.65	0.012	1.065	2.84	0.491	2.85	1.57	0.467	2.18	0.424	2.64	0.54	1.24	0.126	0.73	0.127	2.09
SEL1-10E circ 1	47	49.71	0.2096	2.2977	0.0367	11.15	0.4032	11.29	22.88	0.7046	98.68	53.2788	42.696	11.331	64.2959		42020	162000	107000	45.63	1091	209.5	18.23	31.96	44.1	-0.09	11.33	5.11	16.01	0.0132	0.992	3.32	0.497	2.56	0.72	0.272	1.08	0.204	1.13	0.199	0.407	0.051	0.405	0.069	1.47
SEL1-10E circ 1	48	48.69	0.3	3.12	0.0302	11.74	0.384	10.83	22.84	0.7766	98.73	53.4418	42.848	11.3297	62.13		51960	206000	137000	56.2	1495	270	23.66	48.45	65.3	-0.041	15.27	24.04	34.5	0.024	0.628	2.39	0.645	6.18	3.62	0.93	4.75	0.885	5.62	0.938	2.42	0.32	2.1	0.297	2.31
SEL1-10E circ 1	49	47.19	0.3811	4	0.0244	11.59	0.4083	11.13	21.77	1.0832	97.57	53.5613	42.7012	11.3289	63.0707		77020	298000	198000	83.5	1766	389.5	44.8	67.8	90	-0.059	20.79	32.49	36.8	0.033	1.54	5.18	1.029	9.02	4.49	1.36	6.96	1.089	7.41	1.43	3.61	0.493	2.91	0.498	2.52
SEL1-10E circ 1	50	47.98	0.2945	3.05	0.0224	11.29	0.4383	10.92	22.64	0.7456	97.38	54.5058	42.4898	11.3289	63.2377
SEL1-10E circ 2	51	48.66	0.2389	2.5918	0.0104	11.07	0.3845	11.25	23.11	0.7028	98.02	57.5123	51.1645	11.3179	64.3796		38240	158000	105000	42.5	1277	250.2	33.6	39.64	51.1	0.024	13.25	24.1	32.59	0.016	0.285	1.351	0.545	5.76	3.06	1.036	4.97	0.882	4.83	1.104	2.62	0.341	2.12	0.316	2.11
SEL1-10E circ 2	52	48.15	0.3688	3.27	0	11.38	0.4365	11	22.27	0.7738	97.65	57.5123	52.0892	11.3163	63.2228		53800	214000	140000	57.5	1570	324	41.7	50.5	66.8	0.66	17.99	20.72	29.7	0.436	2.41	9.72	1.295	8.16	3.62	1.065	4.88	0.797	4.38	0.845	2.06	0.261	1.75	0.299	2.11
SEL1-10E circ 2	53	46.99	0.3433	3.46	0.029	11.76	0.4528	11.02	21.87	0.8143	96.73	56.6501	51.8998	11.3147	62.4984		44750	189000	123000	51.2	1735	319.4	41.3	48.58	58.2	0.086	17.24	38.84	51.5	0.053	0.209	2.92	1.102	10.38	5.5	1.71	7.6	1.299	8.08	1.593	4.21	0.529	3.48	0.494	2.86
SEL1-10E circ 2	54	47.31	0.3341	3.12	0.0234	11.49	0.4459	10.95	22.56	0.7953	97.03	56.1851	51.8798	11.3147	62.8926		43030	180000	120000	48.73	1553	296.5	37.87	45.7	57.9	0.026	15.59	22.75	40.08	0.032	0.223	1.199	0.483	5.05	2.98	0.91	4.6	0.797	4.79	0.996	2.31	0.334	1.61	0.258	2.39
SEL1-10E circ 2	55	47.66	0.2421	2.4531	0.0163	11.1	0.4337	11.3	22.35	0.7765	96.33	56.3373	51.6902	11.3147	64.4193
SEL1-10E circ 3 core	56	48.42	0.1738	1.9299	0.0165	12.92	0.4952	10.97	21.26	1.1546	97.34	61.3461	46.9832	11.3201	60.1601		38130	154000	102000	40.1	832	203.3	31.64	40.05	51.2	-0.02	12.48	19.77	19.82	0.021	0.203	0.834	0.416	4.59	3.08	0.826	3.89	0.713	4.59	0.857	2.02	0.273	1.75	0.285	1.02
SEL1-10E circ 3 rim	57	48.51	0.148	1.7867	0.011	11.71	0.4538	11.55	21.24	1.1229	96.53	61.3393	46.91	11.3201	63.6914		23790	100000	66300	26.97	866	155.1	12.8	23.65	32.1	0.022	13.81	16.03	21.28	0.078	1.159	2.54	0.465	3.69	2.11	0.558	3.18	0.554	3.36	0.691	1.669	0.194	1.24	0.168	1.22
SEL1-10E circ 4 trav start	58	47.63	0.3113	3.66	0.0357	12.09	0.4163	10.93	22.12	0.8262	98.02	70.4633	44.729	11.3151	61.6539
SEL1-10E circ 4 trav	59	48.88	0.2349	2.4491	0.043	11.26	0.442	11.56	22.56	0.7962	98.24	70.3938	44.6985	11.3151	64.6124
SEL1-10E circ 4 trav	61	49.31	0.1839	2.376	0.0411	11	0.3832	11.54	22.88	0.6633	98.37	70.2186	44.5698	11.3151	65.1054
SEL1-10E circ 4 trav	62	48.92	0.225	2.7568	0.0394	11.17	0.3827	11.29	22.63	0.7157	98.14	70.1573	44.5275	11.3151	64.2547
SEL1-10E circ 4 trav	63	52.97	0.2147	2.5023	0.0393	11.23	0.4073	11.28	22.53	0.7187	101.89	70.0766	44.434	11.3151	64.1112
SEL1-10E circ 4 trav	64	49.9	0.237	2.6598	0.0489	11.21	0.4167	11.49	22.85	0.7033	99.51	69.9928	44.3678	11.3151	64.5753
SEL1-10E circ 4 trav	65	48.77	0.2308	2.5435	0.0267	11.22	0.3936	11.13	22.98	0.6583	97.96	69.8836	44.2852	11.3151	63.8232
SEL1-10E circ 4 trav	66	49.3	0.1896	2.3559	0.0658	10.93	0.4275	11.38	23.14	0.7842	98.57	69.7786	44.2208	11.3151	64.933
SEL1-10E circ 6	69	48.55	0.3832	3.45	0.039	11.88	0.4081	10.59	22.64	0.8284	98.78	60.2531	30.5355	11.3437	61.3205		28440	118000	76800	30.78	901	197	26.99	30.02	39.1	0.024	8.98	20.55	21.58	0.026	0.493	1.78	0.576	4.88	2.75	0.758	3.62	0.678	4.38	0.837	2.02	0.254	1.86	0.261	1.365
SEL1-10E circ 6	70	48.52	0.4452	4.07	0.0683	12.14	0.4317	10.52	22.19	0.7999	99.19	60.0356	30.5355	11.3437	60.6476		35030	150000	98400	38.91	824	196.4	16.26	37.08	43.8	0.028	14.24	24.17	20.17	0.045	2.81	8.37	1.75	12.41	5.71	1.7	7.4	1.073	5.68	1.019	2.22	0.232	1.62	0.234	1.46
SEL1-10E circ 6	71	49.3	0.3233	3.29	0.0503	12.16	0.3931	10.84	22.23	0.7501	99.33	60.7573	30.4588	11.3437	61.3214
SEL1-10E circ 6	73	49.91	0.2209	2.9232	0.0301	11.13	0.4159	11.65	21.62	0.7419	98.64	61.8393	29.7988	11.3437	65.054		35520	143000	91500	37.92	1103	234.6	48.1	35.8	46.8	0.186	9.84	13.97	25.24	0.269	0.619	1.39	0.343	3.4	1.83	0.483	2.84	0.493	3.11	0.608	1.272	0.17	1.12	0.181	1.83
SEL1-10E circ 6	74	49.68	0.336	3.23	0.0192	12.75	0.4273	10.72	20.02	1.093	98.27	61.8393	29.551	11.3437	59.9248

## Sheet: traverses across selected grain
50 um spots are spaced ~ 25 microns apart
Values in ppm
Sample	point ID	Sc	Ti	V	Cr	Fe	Co	Ni	Rb	Sr	Y	Zr	Nb	Cs	Ba	La	Ce	Pr	Nd	Sm	Eu	Gd	Tb	Dy	Ho	Er	Tm	Yb	Lu	Hf	Ta	Th	U
13 H circ 1	1	70.13	2277	325.4	192.6	78270	67.74	139.9	0.173	8.53	19.76	46.89	0.117	0.058	0.95	2.19	8.47	1.748	11.19	4.29	1.307	5.29	0.747	4.37	0.834	2.01	0.286	1.89	0.226	2.6	0.0133	0.078	0.0218
13 H circ 1	2	69.59	2426	344.8	201.9	72970	69.62	139	0.007	8.38	10.28	48.6	0.071	-0.001	0	1.169	5.33	1.323	9.24	3.66	1.211	3.99	0.531	2.7	0.448	0.963	0.094	0.611	0.083	2.8	0.012	0.0356	0.0056
13 H circ 1	3	70.23	2727	362.3	209.8	73230	69.74	137.7	0.04	8.38	9.9	54.17	0.065	0.007	0.292	0.945	5.11	1.305	9.48	4.02	1.161	4.48	0.596	2.69	0.434	0.918	0.096	0.521	0.065	3.09	0.0187	0.0282	0.0045
13 H circ 1	4	67.86	3337	408.3	223.4	74420	71.87	160.7	0.205	10.86	10.67	62.84	0.339	0.178	4.78	0.955	5.73	1.575	11.45	4.94	1.503	5.34	0.727	3.23	0.433	0.862	0.094	0.501	0.055	3.37	0.0362	0.109	0.052
13 H circ 1	5	69.58	3577	439.7	201.3	75300	71.61	148.8	0.057	9.2	10.37	69.4	0.125	0.072	0.99	0.891	5.97	1.624	11.29	4.6	1.373	5.11	0.645	3.27	0.481	0.884	0.102	0.464	0.068	3.81	0.0226	0.052	0.0151
13 H circ 1	6	65.7	3815	452.8	203.2	76660	74.73	166.4	0.041	10.18	11.44	72.77	0.183	0.026	1.5	0.704	6.21	1.666	13	5.25	1.651	5.98	0.742	3.41	0.511	0.912	0.109	0.542	0.056	3.61	0.0222	0.0231	0.0215
13 H circ 1	7	67	3566	440.4	187	74800	74.77	167.5	0.032	9.09	10.3	69.5	0.099	0.024	0.42	0.754	6.1	1.696	12.94	5.02	1.63	5.71	0.708	3.36	0.453	0.83	0.08	0.421	0.0397	3.53	0.0233	0.0205	0.0169
13 H circ 1	8	69.55	3675	437.8	182.8	75840	74.33	164.3	0.107	9.39	10.68	69.96	0.123	0.028	0.35	0.85	6.08	1.755	12.68	4.87	1.554	5.57	0.716	3.28	0.473	0.89	0.093	0.484	0.0484	3.63	0.0139	0.0268	0.007
13 H circ 1	9	68.6	3613	423.2	186.3	75290	73.63	162.1	0.068	9.77	11.2	65.15	0.277	0.051	2.01	0.775	5.92	1.682	12.42	5.12	1.543	5.39	0.731	3.41	0.499	0.972	0.1	0.567	0.0445	3.61	0.0262	0.062	0.0258
13 H circ 1	10	69.4	3193	381.7	189.1	75730	74.01	160.2	0.107	10.17	12.02	53.65	0.338	-0.001	1.34	1.356	6.18	1.506	10.88	4.61	1.429	5.26	0.696	3.46	0.467	1.061	0.107	0.599	0.071	3.26	0.028	0.088	0.0161
13H circ 2	11	65.97	2664	371.4	183.3	73240	69.48	138.3	-0.001	10.41	10.92	47.75	0.111	0.013	0.019	1.652	7.27	1.61	11.53	4.63	1.459	4.86	0.647	3.14	0.46	0.95	0.096	0.661	0.079	2.69	0.0268	0.047	0.0051
13H circ 2	12	67	3007	402	201.2	72030	70.96	145.8	0.04	10.83	10.58	55.49	0.182	0	0.262	0.921	3.99	1.106	9.77	4.8	1.535	5.28	0.706	3.1	0.452	0.83	0.093	0.487	0.0517	2.78	0.0229	0.055	0.0097
13H circ 2	13	67.11	3219	411.3	205.4	73780	74.69	156.2	0.073	12.6	11.12	57.61	0.49	0.04	3.42	0.85	3.793	1.198	10.4	5.14	1.631	5.81	0.728	3.29	0.488	0.857	0.089	0.557	0.0522	2.87	0.0393	0.162	0.048
13H circ 2	14	66.19	3168	413.6	204.1	73520	74.89	157.2	0.06	12.08	11.29	54.33	0.404	0.018	1.79	0.693	3.35	1.116	10.19	5.09	1.688	5.87	0.752	3.29	0.46	0.826	0.095	0.497	0.0538	2.84	0.0269	0.087	0.0192
13H circ 2	15	66.17	3120	409.7	202.4	73010	73.52	154.6	0.062	12.29	11.02	50.98	0.5	0.042	2.8	0.702	3.302	1.13	9.78	5.05	1.705	5.75	0.739	3.25	0.469	0.85	0.092	0.465	0.065	2.75	0.0387	0.119	0.0256
13H circ 2	16	66.08	3022	398.4	191.8	72030	71.87	149.9	0.14	12.6	10.9	46.89	0.552	0.135	3.58	0.79	3.63	1.086	9.67	4.6	1.547	5.59	0.7	3.12	0.446	0.829	0.083	0.507	0.059	2.79	0.0305	0.191	0.036
13H circ 2	17	67.36	2658	379.6	175.8	71410	70.5	138.4	0.034	10.44	9.74	37.4	0.145	0	0.148	0.884	3.93	1.16	8.62	4.35	1.385	5.06	0.65	3.01	0.419	0.779	0.073	0.488	0.0589	2.51	0.0202	0.055	0.0061
13H circ 2	18	63.26	2094	300.8	122.8	71620	65.95	116.5	1.34	13.94	14.04	31.39	0.567	0.232	9.9	2.61	9.63	1.923	13.22	4.63	1.494	5.36	0.673	3.62	0.577	1.308	0.159	0.921	0.117	2.029	0.057	0.468	0.086
13H circ 2	19	71.96	1973	304.3	136.7	71980	64.73	113.2	0.032	9.98	17	21.05	0.075	0.014	0	1.896	7.65	1.472	10.14	4.11	1.311	4.8	0.731	3.91	0.694	1.64	0.225	1.46	0.176	1.843	0.0178	0.0406	0.0026
13H circ 3	20	67.32	2320	355.3	163.6	69970	66.45	131.1	0.01	10.2	9.56	42.04	0.109	0.001	0.024	0.905	4.312	1.085	8.9	4	1.338	4.27	0.599	2.54	0.425	0.805	0.093	0.525	0.0612	2.461	0.0166	0.0291	0.0042
13H circ 3	21	67.74	2782	401.7	187.1	73700	70.67	143.2	0.135	11.59	11.16	48.4	0.313	0.069	3.08	0.868	4.15	1.273	10.5	4.8	1.553	5.51	0.696	3.25	0.507	0.88	0.095	0.563	0.073	2.89	0.0213	0.07	0.037
13H circ 3	22	65.48	3260	392.2	187.4	73360	72.24	145.2	0.047	11.27	9.93	51.93	0.717	0.04	2.69	0.697	3.73	1.254	10.96	4.99	1.536	4.99	0.648	3.03	0.393	0.824	0.083	0.473	0.061	2.88	0.0348	0.081	0.029
13H circ 3	23	67.91	2995	406.9	203.6	76030	74.99	154.8	0.307	13.04	11.15	52.36	0.552	-0.013	8.27	0.804	4.28	1.371	11.63	5.42	1.592	5.85	0.732	3.28	0.468	0.892	0.09	0.561	0.063	2.85	0.0247	0.056	0.0136
13H circ 3	24	67.5	2558	384.5	185.4	73780	72.12	147.5	0.099	12.27	11.41	42.28	0.307	0.038	1.75	1.308	5.01	1.332	10.35	5.07	1.63	5.49	0.691	3.29	0.48	0.95	0.103	0.581	0.059	2.76	0.0263	0.072	0.0213
13H circ 3	25	67.18	2206	345.3	171.3	76600	69.01	134.3	0.126	10.8	13.75	40.78	0.141	0.032	0.22	1.834	6.99	1.515	10.61	4.42	1.386	4.93	0.711	3.37	0.566	1.226	0.164	1.026	0.136	2.55	0.0231	0.053	0.0088
13H circ 3	26	65.77	1752	284.9	147.3	75860	66.93	126.1	0.35	10.93	15.07	42	0.153	0.038	2.3	1.78	7.31	1.457	10.38	3.93	1.22	4.43	0.675	3.46	0.615	1.446	0.218	1.36	0.195	2.41	0.0184	0.095	0.026
13H circ 3	27	68.03	2480	370.7	177.1	73010	71.02	137.7	-0.003	10.55	10.34	46.83	0.119	0.034	0.031	1.067	4.74	1.232	10.34	4.53	1.488	5.18	0.622	2.94	0.427	0.866	0.107	0.51	0.062	2.88	0.0159	0.0342	0.0095
10i circ 1	28	66.2	1491	308.8	41.59	83720	54.89	72.1	0.11	18.98	27.22	28.6	0.5	0.006	2.59	0.306	2.55	0.814	7.64	4.3	1.077	5.54	0.981	6.09	1.175	2.85	0.36	2.25	0.341	1.93	0.0228	0.0057	0.0035
10i circ 1	29	65.9	1807	341.3	42.94	88550	57.33	74.8	-0.031	20.21	50.25	48.98	0.052	0.013	0.24	0.312	5.03	1.959	16.89	7.54	2.069	9.58	1.641	11.05	2.116	5.54	0.708	4.58	0.667	2.77	0.0167	0.0017	0.0035
10i circ 1	30	65.6	1978	357.6	43	89540	58.06	74.4	0.158	20.52	51.29	56.74	0.101	0.01	1.21	0.321	4.63	1.825	15.14	7.33	1.9	9.13	1.668	10.75	2.061	5.25	0.712	4.35	0.634	3.11	0.0254	0	0.0104
10i circ 1	31	66.43	2072	363.9	41.55	89650	57.59	72.3	0.047	20.25	53.67	58.45	0.225	-0.018	0.345	0.397	5.08	1.96	17.35	7.84	1.971	10.03	1.759	10.87	2.191	5.43	0.743	4.63	0.652	3.05	0.0339	0.00044	0.007
10i circ 1	32	65.7	1975	363.1	38.99	88920	56.99	71.3	0.219	20.21	52.7	47.67	0.65	0.017	1.03	0.384	4.93	1.98	17.07	7.72	1.976	9.96	1.755	10.73	2.213	5.35	0.747	4.43	0.643	2.86	0.054	0.002	0.0024
10i circ 1	33	66	1401	312.1	31.7	86640	55.24	71.6	0.021	20.2	41.8	30.4	0.052	-0.016	0.045	0.233	4.15	1.65	13.49	6.71	1.633	8.04	1.408	8.81	1.719	4.25	0.576	3.69	0.534	1.93	0.0182	0	0
10i circ 1	34	66.9	2148	370.6	37.77	90130	56.86	74.4	0.122	20.66	53.4	51.97	0.138	0.013	1.15	0.173	3.45	1.573	15.22	7.68	2.046	9.99	1.812	11.65	2.223	5.77	0.731	4.57	0.638	3.04	0.0274	0	0
10i circ 1	35	67.1	2053	345.5	41.88	88270	56.87	74.3	0.106	19.82	43.91	53.44	0.08	-0.001	0.41	0.208	2.398	1.076	9.68	5.19	1.253	7.02	1.335	8.96	1.785	4.91	0.634	3.99	0.576	2.97	0.0263	0	0.0023
10i circ 1	36	68.12	1551	342.6	37.5	85470	52.5	63.5	0.036	18.72	25.73	27.4	0.047	0.014	0	1.069	4.56	1.144	8.27	3.36	0.969	4.75	0.873	5.47	1.032	2.77	0.376	2.35	0.358	1.7	0.0135	0.0198	0.0043
10i circ 1	37	67.5	1946	342.3	44.48	87540	54.47	70.4	0.175	19.26	30.55	64.7	0.207	0.01	1.52	0.297	1.864	0.797	7.93	4.41	1.069	6.16	1.121	7.16	1.311	3.36	0.417	2.48	0.383	3.27	0.026	0.0248	0.0154
10i circ 1	38	67.85	1609	328.1	44.87	84510	51.11	64.4	0.006	18.03	17.96	33.67	0.058	-0.023	0	1.376	4.59	0.885	5.81	2.77	0.683	3.59	0.637	4.02	0.734	1.79	0.238	1.63	0.239	2.39	0.0112	0.037	0.0079
10i circ 2	39	69.29	1562	330.9	39.44	89650	61.39	82.2	0.038	18.04	36.61	23.1	0.097	0.017	1.1	0.944	2.65	0.719	7.38	4.84	1.247	7.19	1.253	7.88	1.567	3.99	0.528	3.44	0.528	1.78	0.0226	0.0408	0.0121
10i circ 2	40	66.8	1883	390.5	42.22	95000	62.04	83.8	0.047	20.89	58.6	44.74	0.073	0.002	0	0.521	5.25	1.925	16.38	8.15	2.36	10.9	1.95	12.15	2.465	6.21	0.856	5.83	0.813	2.87	0.0394	0.0096	0.002
10i circ 2	41	66.56	2080	407.9	40.69	95730	62.09	82.7	0.001	22.08	62.83	53.15	0.086	-0.013	0.173	0.511	6.08	2.281	18.41	8.8	2.44	12.19	1.923	12.73	2.525	6.78	0.921	6.28	0.901	3.27	0.038	0.007	0.0008
10i circ 2	42	68.3	2275	424.2	40.45	97130	63.29	83.6	0.255	21.42	64.77	51.03	0.131	-0.011	1.69	0.42	4.89	1.961	17.58	8.7	2.56	12.51	2.113	13.16	2.684	7.05	0.97	6.13	0.913	3.22	0.0409	0.0177	0.0023
10i circ 2	43	69.33	2302	433.6	35.59	97570	62.75	82.8	0.059	19.65	61.54	55.56	0.114	-0.006	0.35	0.416	3.68	1.557	15.35	8.17	2.336	11.69	2.01	12.66	2.593	6.6	0.939	6.05	0.895	3.48	0.0417	0.0202	0.0028
10i circ 2	44	68.4	2253	432	34.49	95440	62.74	83.6	0.042	19.3	58.94	52.81	0.08	0.002	0.005	0.609	3.61	1.429	14.01	7.91	2.096	11.07	1.956	12.09	2.481	6.44	0.857	5.41	0.823	3.63	0.0519	0.0192	0.002
10i circ 2	45	67.82	1641	372.7	43.5	88460	59.74	78.8	0.039	16.6	34.43	27.48	0.058	-0.009	0	2.75	8.11	1.312	8.58	4.43	1.172	6.63	1.164	7.52	1.47	3.62	0.51	3.31	0.516	2.32	0.0246	0.056	0.0015
10i circ 2	46	68.9	2032	409.2	40.01	90180	59.87	81.2	-0.009	16.29	36.83	42.9	0.074	0.017	0	1.923	3.98	0.669	6.14	4.57	1.135	7.2	1.343	8.29	1.646	4.04	0.534	3.34	0.517	3.33	0.0353	0.059	0.004
10i circ 2	47	68.73	2004	407	40.35	92150	62.01	84.2	0.007	17.5	47.21	48.02	0.081	0.002	0	2.2	4.83	1.058	9.36	6	1.643	8.98	1.558	10.21	2.039	5.2	0.655	4.31	0.67	3.27	0.0263	0.078	0.0049
13e circ 1	48	69.21	1739	385	33.12	89360	61.77	80.9	-0.011	16.72	39.05	32.82	0.049	-0.005	0	2.151	5.96	1.032	8.19	4.84	1.32	7.72	1.277	8.44	1.67	4.21	0.536	3.53	0.544	2.51	0.0276	0.05	0.0038
13e circ 1	49	26.92	1538	227.8	127.9	82240	40.47	58.9	-0.019	42.28	2.81	21.34	0.0093	0.013	0	0.329	0.913	0.162	1.1	0.416	0.103	0.477	0.093	0.56	0.118	0.268	0.0485	0.443	0.083	1.85	0.0032	0.0012	0.0053
13e circ 1	50	27.53	2034	252.1	132.5	84560	40.99	64.7	-0.044	41.25	3.13	28.96	0.038	0.032	0.016	0.472	0.879	0.169	1.02	0.412	0.096	0.461	0.106	0.637	0.135	0.333	0.0558	0.413	0.101	2.55	0.0084	0.0026	0.0183
13e circ 1	51	27.89	923	197.9	127.2	80670	40.9	44.4	1.26	44.28	2.345	10.41	0.138	0.037	7.2	1.87	3.62	0.375	1.55	0.367	0.07	0.502	0.077	0.428	0.093	0.255	0.0429	0.303	0.073	1.223	0.0099	0.0333	0.091
13e circ 1	52	27.48	1006	203.2	155.4	79750	38.05	44.2	1.92	62.9	2.44	10.99	0.169	0.041	46	2.096	3.75	0.386	1.63	0.476	0.078	0.462	0.083	0.415	0.09	0.271	0.0351	0.306	0.06	1.379	0.0047	0.047	0.149
13e circ 1	53	26.1	1424	224.8	146	80570	39.46	54.5	0.015	43.68	2.49	20.24	0.028	-0.014	0.341	0.446	0.918	0.135	0.95	0.406	0.086	0.46	0.09	0.547	0.093	0.313	0.0436	0.361	0.0732	1.94	0.0018	0.003	0.0047
13e circ 1	54	26.01	1798	238.8	144.4	83760	42.05	66.3	0.045	42.22	3.57	25.65	0.0219	0.004	0.005	0.273	0.785	0.185	1.16	0.547	0.125	0.75	0.111	0.827	0.144	0.398	0.063	0.476	0.11	2.14	0.0026	0.00038	0.0043
13e Circ 2	55	21.21	1206	224.8	83.9	91560	47.74	59.7	0.47	52.3	3.46	22.72	0.088	0.006	1.97	1.65	3.64	0.475	2.29	0.512	0.142	0.664	0.11	0.592	0.125	0.41	0.0596	0.51	0.114	1.61	0.0023	0.079	0.106
13e Circ 2	56	23.93	1387	183	76.21	83510	49.38	75	-0.018	36.91	2.68	45.5	0	0.018	0	0.159	0.668	0.148	0.96	0.315	0.075	0.435	0.077	0.546	0.11	0.292	0.0436	0.387	0.0804	2.83	0.00061	0	0.008
13e Circ 2	57	23.13	2656	285.1	162.3	90000	49.03	76.5	0.028	37.14	4.21	60.67	0.03	0.008	0.95	0.321	0.996	0.197	1.38	0.642	0.133	0.77	0.113	0.843	0.181	0.48	0.071	0.66	0.12	3.03	0	0.0073	0.04
13e Circ 2	58	23.04	1808	266.2	207	86970	49.07	72.9	0.163	39.56	3.26	37.04	0.0125	0.017	11.6	0.717	1.442	0.217	1.51	0.575	0.108	0.681	0.113	0.607	0.144	0.386	0.0537	0.392	0.087	2.14	0.0011	0.0144	0.0344
13e Circ 2	59	22.1	2318	265.3	153.4	91760	51.36	77.5	0.48	40.89	5.06	53.89	0.434	0.03	11.58	0.653	1.96	0.24	1.97	0.85	0.164	1.04	0.168	1.023	0.214	0.512	0.08	0.553	0.1	2.95	0.0062	0.067	0.08
13e Circ 2	60	22.54	2404	267.6	149.9	94010	51.3	78.3	0.026	44.61	5.84	59.72	0.0154	0.001	2.63	0.261	1.029	0.291	2.32	1	0.175	1.35	0.189	1.38	0.236	0.654	0.08	0.744	0.119	2.9	0.0038	0.0107	0.0353
13e Circ 2	61	22.33	2345	272.7	155.3	93540	48.74	76.6	-0.038	43.59	4.35	56.22	0.0106	0.002	0.56	0.375	1.013	0.224	1.79	0.8	0.147	1.07	0.171	0.914	0.191	0.51	0.061	0.553	0.089	2.89	0.0021	0.0036	0.0371
13e Circ 2	62	23	2034	243	144.9	91370	49	74.3	0.028	43.94	4.99	45.02	0.0055	0.004	0.3	0.729	1.76	0.398	2.76	0.93	0.199	1.22	0.167	1.112	0.206	0.536	0.076	0.535	0.11	2.445	0.0052	0.0096	0.0376
13e circ 3	63	45.24	2002	227.1	28.44	90350	52.96	63.8	0.22	36.42	3.03	37.2	0.167	0.027	2.76	1.044	2.576	0.288	1.55	0.441	0.129	0.413	0.085	0.483	0.115	0.332	0.0535	0.43	0.095	2.14	0.0037	0.107	0.1
13e circ 3	64	42.85	2299	244.4	24.41	98250	54.81	70.2	0.089	37.63	3.71	54.75	0.062	-0.008	0.226	0.424	1.5	0.271	1.83	0.644	0.135	0.603	0.101	0.648	0.143	0.373	0.058	0.56	0.116	2.45	0	0.074	0.086
13e circ 3	65	42.96	2531	261.3	19.79	105210	57.24	71.4	-0.01	35.77	3.84	63.82	0.034	0.009	0.132	0.352	1.13	0.249	1.73	0.53	0.13	0.661	0.095	0.713	0.144	0.442	0.065	0.503	0.095	2.5	0.0019	0.061	0.106
13e circ 3	66	42.88	2535	249.6	16.77	100630	55.79	68.1	0.47	35.49	3.75	70.15	0.0213	0.04	2.69	0.369	1.233	0.261	1.66	0.506	0.15	0.631	0.097	0.728	0.157	0.373	0.066	0.495	0.108	2.64	0	0.044	0.129
13e circ 3	67	43.17	2021	201.4	10.83	104190	59.94	79.6	0.44	49.45	4.74	42.11	0.059	0.03	2.37	1.092	2.642	0.444	2.18	0.71	0.181	0.81	0.131	0.862	0.174	0.564	0.075	0.574	0.13	1.97	0.0026	0.071	0.177
13e circ 3	68	46.01	2072	231.7	18.3	94500	53.67	60.9	0.023	34.92	2.87	40.18	0.03	0.011	0	0.489	1.343	0.236	1.23	0.367	0.129	0.463	0.069	0.531	0.115	0.323	0.0497	0.433	0.092	2.198	0.0021	0.06	0.094
13e circ 3	69	46.09	2227	215.9	20.38	97570	52.91	63	0.67	40.68	3.86	43.3	0.099	0.034	1.9	0.953	2.366	0.395	1.97	0.572	0.176	0.579	0.106	0.64	0.148	0.437	0.053	0.56	0.112	2.21	0.0042	0.181	0.322
13e circ 3	70	52.57	1491	137.5	24.83	91030	52.56	57.7	0.043	38.77	6.89	22.76	0.137	0.03	1.44	2.84	7.06	0.892	4.18	0.93	0.315	1.02	0.163	1.11	0.232	0.694	0.107	0.92	0.179	1.5	0.0019	0.389	0.41
