# Supplementary material for: New evidence for upper Permian crustal growth below Eifel, Germany, from mafic granulite xenoliths
Source: Copernicus journal article supplement (doi:10.5194/ejm-33-233-2021), 2021-04-29
Supplement: Supplementary file 2 [file Electronic Appendix S3_plagioclase analyses.xlsx]

## Sheet: plag
		Major oxides (EMPA)													Structural formulae (8 oxygens)
Sample	Pt#	SiO2	Al2O3	FeO	MnO	CaO	Na2O	K2O	Cr2O3	total	X(mm)	Y(mm)	Label		Si	Al	Fe2+	Mn	Ca	Na	K	Cr	An	Ab	Or
SEL 1-13H circ 1	1	46.35	34.55	0.3922	0.0098	17.49	1.6679	0.0355	0.0016	100.497	13.3996	4.644	SEL 1-13H circ 1		2.12487	1.86695	0.0150372	0.000380558	0.859147	0.148263	0.00207631	5.8e-05	0.851073	0.14687	0.0020568
SEL 1-13H circ 1	2	44.27	34.63	0.3884	0	17.49	1.4602	0.021	0	98.2596	13.3996	4.8662	SEL 1-13H circ 1		2.08009	1.91791	0.0152625	0	0.880555	0.133035	0.00125885	0	0.867671	0.131088	0.00124043
SEL 1-13H circ 2	3	45.37	34.44	0.3933	0.0065	17.17	1.7309	0.0231	0	99.1338	12.7831	7.5315	SEL 1-13H circ 2		2.10954	1.88749	0.0152939	0.000256002	0.855428	0.156053	0.00137029	0	0.844574	0.154073	0.0013529
SEL 1-13H circ 2	4	45.66	34.48	0.3787	0.0007	17.52	1.5336	0.0306	0	99.6036	12.6658	6.9035	SEL 1-13H circ 2		2.11293	1.88069	0.0146561	2.74e-05	0.868714	0.137607	0.00180656	0	0.86171	0.136498	0.00179199
SEL 1-13H circ 2	5	45.49	34.37	0.3841	0.0108	16.96	1.6874	0.0294	0	98.9317	12.3346	7.2392	SEL 1-13H circ 2		2.11698	1.88531	0.0149493	0.000425731	0.845707	0.152265	0.00174554	0	0.845946	0.152308	0.00174603
SEL 1-13H circ 3	6	47.26	33.23	0.3773	0	15.34	2.5894	0.0475	0.004	98.8482	15.9906	16.0782	SEL 1-13H circ 3		2.19088	1.81575	0.0146281	0	0.761981	0.232758	0.00280931	0.000146623	0.763854	0.23333	0.00281621
SEL 1-13H circ 3	7	45.77	34.41	0.4482	0.0128	16.88	1.6744	0.0121	0.0265	99.234	15.9036	15.8148	SEL 1-13H circ 3		2.1225	1.88085	0.0173826	0.000502791	0.838751	0.150559	0.000715868	0.000971694	0.847201	0.152076	0.00072308
SEL 1-13H circ 3	8	47.74	34.11	0.512	0	16.46	2.0763	0.0215	0	100.92	15.0006	15.8588	SEL 1-13H circ 3		2.17148	1.82876	0.0194769	0	0.802228	0.183124	0.00124765	0	0.813124	0.185611	0.0012646
SEL 1-13H circ 3	9	48.56	32.3	0.216	0	14.52	3.14	0.0233	0	98.7593	14.8846	16.2653	SEL 1-13H circ 3		2.24521	1.76029	0.00835234	0	0.719349	0.281507	0.00137441	0	0.717748	0.28088	0.00137135
SEL 1-13H circ 4	10	45.19	33.5	0.6452	0.0421	17.02	1.832	0.0227	0	98.252	20.4691	16.7972	SEL 1-13H circ 4		2.12393	1.85586	0.0253611	0.00167607	0.857141	0.166957	0.00136115	0	0.835861	0.162812	0.00132736
SEL 1-13H circ 4	11	46.88	33.66	0.4739	0	16.77	2.0981	0.033	0.0054	99.9204	20.9163	16.2708	SEL 1-13H circ 4		2.15913	1.82729	0.0182538	0	0.827597	0.187369	0.00193904	0.000196654	0.813839	0.184254	0.00190681
SEL 1-13H circ 4	12	46.14	33.47	0.4112	0.026	16.27	2.2793	0.0377	0	98.6342	20.2113	17.522	SEL 1-13H circ 4		2.15243	1.84039	0.0160428	0.00102739	0.813268	0.206174	0.00224375	0	0.796006	0.201798	0.00219613
SEL 1-13H circ 4	13	46.01	33.6	0.4084	0.0066	16.28	2.1659	0.0314	0	98.5023	20.0648	17.6663	SEL 1-13H circ 4		2.14827	1.84918	0.0159477	0.000261031	0.814491	0.196091	0.00187046	0	0.804474	0.193679	0.00184746
SEL 1-13H circ 5	14	47.03	33.22	0.3782	0	15.72	2.5079	0.0309	0	98.887	27.7448	16.6578	SEL 1-13H circ 5		2.18229	1.81694	0.0146769	0	0.7816	0.225646	0.00182927	0	0.77457	0.223617	0.00181282
SEL 1-13H circ 5	15	47.9	32.93	0.3153	0	15.59	2.6564	0.0266	0	99.4183	27.7448	16.6953	SEL 1-13H circ 5		2.20759	1.78887	0.012153	0	0.769882	0.237388	0.00156404	0	0.763141	0.235309	0.00155034
SEL 1-13H circ 5	16	48.03	32.81	0.3363	0.0226	15.34	2.8259	0.0389	0.0124	99.4161	27.7448	16.7198	SEL 1-13H circ 5		2.21354	1.78231	0.0129622	0.000882256	0.757521	0.25253	0.00228721	0.00045187	0.748289	0.249452	0.00225933
SEL 1-13H circ 5	17	48.57	32.55	0.3028	0	14.79	2.9748	0.0398	0	99.2274	27.7448	16.789	SEL 1-13H circ 5		2.23696	1.76703	0.0116633	0	0.729881	0.265661	0.00233859	0	0.731431	0.266225	0.00234356
SEL 1-13H circ 5	18	48.6	32.32	0.3067	0	15.14	3.21	0.0427	0.0112	99.6306	27.7448	16.9248	SEL 1-13H circ 5		2.2348	1.75177	0.0117948	0	0.745973	0.286213	0.00250503	0.000407229	0.720962	0.276617	0.00242104
SEL 1-13H circ 5	19	47.71	32.59	0.329	0.0212	15.6	2.8019	0.0433	0.0024	99.0978	27.7448	17.1038	SEL 1-13H circ 5		2.20885	1.77845	0.0127388	0.000831386	0.773882	0.25153	0.00255756	8.79e-05	0.752826	0.244686	0.00248797
SEL 1-13H circ 5	20	46.3	34.42	0.4422	0.0163	16.85	2.1205	0.0493	0	100.198	27.7448	17.2328	SEL 1-13H circ 5		2.12896	1.86552	0.0170051	0.00063487	0.830195	0.189062	0.0028921	0	0.812205	0.184965	0.00282944
SEL 1-13H circ 5	21	45.02	34.4	0.5765	0.0041	17.18	1.5895	0.011	0.003	98.7841	27.7511	17.2635	SEL 1-13H circ 5		2.10243	1.89355	0.022516	0.000162185	0.859674	0.143932	0.000655376	0.000110778	0.856026	0.143321	0.000652595
SEL 1-13H circ 6	22	51.36	31.15	0.3683	0	12.95	4.15	0.0643	0.0035	100.046	29.7091	15.4508	SEL 1-13H circ 6		2.33392	1.66848	0.0139971	0	0.630557	0.36567	0.0037278	0.000125761	0.630586	0.365686	0.00372797
SEL 1-13H circ 6	23	46.9	33.87	0.6773	0.0441	16.46	1.9718	0.0317	0	99.9549	29.3411	15.3062	SEL 1-13H circ 6		2.1581	1.83703	0.0260649	0.00171889	0.811565	0.175931	0.00186097	0	0.820295	0.177824	0.00188099
SEL 1-13H circ 6	24	46.98	33.59	0.4747	0.0122	16.47	2.2314	0.019	0	99.7773	28.5168	15.5695	SEL 1-13H circ 6		2.16524	1.82476	0.0182973	0.000476281	0.813355	0.199412	0.00111719	0	0.802217	0.196681	0.00110189
SEL 1-13H circ 6	25	47.2	33.6	0.4794	0.0601	16.15	2.1891	0.0396	0	99.7182	33.0686	10.9178	SEL 1-13H circ 7		2.17373	1.82392	0.0184645	0.00234449	0.796949	0.195483	0.0023267	0	0.801148	0.196513	0.00233896
SEL 1-13H circ 7	26	47.13	33.68	0.4697	0	15.87	2.2947	0.029	0	99.4734	33.0686	10.9178	SEL 1-13H circ 7		2.17378	1.83102	0.0181182	0	0.784314	0.205223	0.00170647	0	0.791243	0.207036	0.00172154
SEL 1-13H circ 7	27	47.52	33.57	0.4177	0.0054	16.18	2.3297	0.0231	0	100.046	33.0686	10.9482	SEL 1-13H circ 7		2.18035	1.81553	0.0160284	0.000209872	0.795467	0.207267	0.0013522	0	0.79223	0.206423	0.0013467
SEL 1-13H circ 7	28	47.38	33.38	0.4241	0	15.83	2.4071	0.0394	0	99.4606	33.0686	10.9748	SEL 1-13H circ 7		2.18526	1.81467	0.0163588	0	0.782319	0.21527	0.00231839	0	0.782391	0.21529	0.0023186
SEL 1-13H circ 7	29	47.76	33.41	0.449	0.0033	15.68	2.3817	0.0446	0.0059	99.7345	33.0686	11.0035	SEL 1-13H circ 7		2.19442	1.8094	0.0172535	0.000128434	0.771961	0.212189	0.0026144	0.00021435	0.782315	0.215035	0.00264946
SEL 1-13H circ 7	30	47.24	33.57	0.4013	0	15.85	2.3712	0.0415	0	99.474	33.0686	11.0322	SEL 1-13H circ 7		2.17849	1.82474	0.0154772	0	0.783195	0.212029	0.00244161	0	0.785028	0.212525	0.00244732
SEL 1-13H circ 7	31	47.5	33.4	0.4206	0.018	15.76	2.4698	0.0233	0	99.5917	33.0686	11.0822	SEL 1-13H circ 7		2.18748	1.813	0.0161992	0.000702156	0.777679	0.220543	0.00136895	0	0.777998	0.220633	0.00136951
SEL 1-13H circ 7	32	48.94	32.52	0.3242	0.04	14.53	3.12	0.0576	0.0038	99.5356	33.0686	11.1295	SEL 1-13H circ 7		2.24602	1.75915	0.0124434	0.00155497	0.714513	0.277642	0.00337252	0.000137896	0.717723	0.27889	0.00338767
SEL 1-13H circ 7	33	46.64	33.96	0.2397	0.0113	16.53	2.0316	0.0292	0.0019	99.4437	33.0686	11.184	SEL 1-13H circ 7		2.15383	1.84852	0.00925757	0.000442021	0.817938	0.181917	0.00172035	6.94e-05	0.816652	0.18163	0.00171765
SEL 1-13H circ 7	35	45.84	34.39	0.1932	0.0392	17	1.7668	0.0082	0	99.2374	33.0686	11.391	SEL 1-13H circ 7		2.12454	1.87869	0.00748863	0.00153892	0.844234	0.158777	0.000484859	0	0.841293	0.158224	0.00048317
SEL 1-13H circ 7	36	46.33	34.38	0.3219	0.0007	16.26	1.9062	0.0112	0.0035	99.2135	33.0686	11.4805	SEL 1-13H circ 7		2.14246	1.87395	0.0124494	2.74e-05	0.805685	0.170923	0.00066077	0.000127978	0.824425	0.174898	0.000676139
SEL 1-13H circ 7	37	46.49	34.17	0.2586	0.0351	16.41	1.947	0.0072	0.0047	99.3226	33.0686	11.5315	SEL 1-13H circ 7		2.14832	1.86117	0.00999409	0.00137391	0.812535	0.174456	0.000424476	0.000171733	0.822891	0.176679	0.000429886
SEL 1-13H circ 7	38	45.4	34.99	0.3575	0.0066	18.16	1.4543	0	0	100.368	33.0686	11.5742	SEL 1-13H circ 7		2.08931	1.89799	0.0137594	0.000257278	0.895484	0.129772	0	0	0.873424	0.126576	0
SEL 1-13H circ 7	39	47.94	33.14	0.3193	0.0271	15.96	2.615	0.034	0	100.035	33.0686	11.6362	SEL 1-13H circ 7		2.19882	1.79162	0.012248	0.00105286	0.784364	0.232564	0.00198953	0	0.769801	0.228246	0.00195259
SEL 1-13H circ 7	40	47.45	33.36	0.4377	0.002	16.41	2.3964	0.0352	0.0019	100.093	33.0686	11.6875	SEL 1-13H circ 7		2.17934	1.806	0.0168128	7.78e-05	0.807591	0.213417	0.00206259	6.9e-05	0.78938	0.208604	0.00201608
SEL 1-13H circ 7	41	46.22	34.05	0.3255	0.0086	17.19	1.9251	0.026	0.0026	99.7478	33.0686	11.764	SEL 1-13H circ 7		2.13454	1.85351	0.0125719	0.000336422	0.850639	0.172389	0.0015319	9.49e-05	0.830248	0.168257	0.00149518
SEL 1-13H circ 7	42	46.83	33.88	0.4885	0	16.72	2.0751	0.0388	0	100.032	33.0686	11.7922	SEL 1-13H circ 7		2.15407	1.83688	0.0187921	0	0.824073	0.185078	0.00227692	0	0.814762	0.182987	0.0022512
SEL 1-13H circ 7	43	45.23	34.74	0.4649	0.0283	18.06	1.4118	0.0089	0	99.9439	33.0686	11.911	SEL 1-13H circ 7		2.09131	1.89332	0.0179774	0.00110838	0.894755	0.126574	0.000525005	0	0.875619	0.123867	0.000513776
SEL1-10E circ 1	44	56.74	28.05	0.1115	0.006	9.59	6.22	0.4941	0	101.212	52.8741	42.3522	SEL1-10E circ 1		2.52468	1.47113	0.00414922	0.000226141	0.457224	0.536646	0.0280487	0	0.447418	0.525135	0.0274471
SEL1-10E circ 1	45	55.97	28.08	0.0938	0.0067	9.69	6.14	0.4119	0.003	100.395	52.8741	41.993	SEL1-10E circ 1		2.51166	1.48527	0.00352033	0.000254678	0.465932	0.534261	0.0235819	0.000106449	0.455112	0.521854	0.0230342
SEL1-10E circ 1	46	56.51	27.79	0.1049	0.0013	9.48	6.28	0.361	0	100.527	52.8741	41.8915	SEL1-10E circ 1		2.52955	1.46625	0.00392707	4.93e-05	0.454695	0.545078	0.0206161	0	0.44561	0.534186	0.0202042
SEL1-10E circ 1	47	56.68	27.48	0.0819	0.01	9.05	6.52	0.321	0	100.143	52.8741	41.6692	SEL1-10E circ 1		2.5439	1.45375	0.00307418	0.000380173	0.435224	0.567412	0.0183805	0	0.426266	0.555732	0.0180021
SEL1-10E circ 1	48	57.4	27.2	0.1028	0	8.59	6.75	0.2972	0	100.34	52.8741	41.3232	SEL1-10E circ 1		2.56658	1.43356	0.00384425	0	0.411558	0.585232	0.0169541	0	0.405978	0.577298	0.0167242
SEL1-10E circ 1	49	57.05	26.96	0.1348	0	8.65	6.74	0.3081	0	99.8429	52.8741	40.8105	SEL1-10E circ 1		2.56579	1.42918	0.00507027	0	0.416846	0.587769	0.0176782	0	0.407756	0.574951	0.0172927
SEL1-10E circ 1	50	56.73	26.95	0.0599	0	8.7	6.82	0.3014	0.0028	99.5641	52.8741	40.374	SEL1-10E circ 1		2.55989	1.43341	0.00226054	0	0.420652	0.596725	0.0173514	9.99e-05	0.406534	0.576697	0.016769
SEL1-10E circ 1	51	55.86	27.11	0.1327	0.0285	8.94	6.65	0.2852	0	99.0064	52.8741	39.8103	SEL1-10E circ 1		2.53916	1.45252	0.0050447	0.00109735	0.435432	0.586126	0.0165394	0	0.419452	0.564616	0.0159324
SEL1-10E circ 2	52	56.05	27.37	0.4653	0.0142	9.41	6.32	0.5308	0	100.16	56.5331	52.347	SEL1-10E circ 2		2.52703	1.4545	0.0175446	0.000542294	0.454589	0.552501	0.0305314	0	0.438107	0.532469	0.0294245
SEL1-10E circ 2	53	53.71	30.09	0.7751	0.0147	12.6	4.42	0.233	0.0003	101.843	56.7816	50.9945	SEL1-10E circ 2		2.39755	1.5832	0.0289365	0.000555828	0.602667	0.382574	0.0132693	1.06e-05	0.603566	0.383145	0.0132892
SEL1-10E circ 2	54	59.04	27.02	0.2883	0	8.56	6.58	0.6961	0	102.184	56.7321	50.8772	SEL1-10E circ 2		2.59389	1.39924	0.0105932	0	0.402971	0.560547	0.0390174	0	0.401952	0.55913	0.0389187
SEL1-10E circ 3	55	56.86	27.26	0.3197	0	8.96	6.45	0.5906	0.0016	100.442	61.9776	47.1302	SEL1-10E circ 3		2.54953	1.44073	0.0119887	0	0.430483	0.560782	0.0337854	5.67e-05	0.419963	0.547078	0.0329597
SEL1-10E c3 core	57	57.56	26.91	0.1367	0.0105	8.27	6.78	0.6517	0	100.319	61.5958	47.1555	SEL1-10E c3 core		2.57724	1.4202	0.00511892	0.000398231	0.396766	0.588633	0.0372275	0	0.387987	0.575609	0.0364038
SEL1-10E c3 rim no sieve	58	57.39	26.6	0.2094	0	8.21	6.56	0.6682	0.004	99.6416	61.5958	47.1012	SEL1-10E c3 rim no sieve		2.58553	1.41253	0.00788978	0	0.396324	0.573056	0.0384061	0.000142492	0.393262	0.568629	0.0381094
SEL1-10E c4	59	56.77	28.07	0.0968	0.0138	9.51	6.28	0.3862	0.0016	101.128	68.9713	42.9448	SEL1-10E c4		2.52608	1.47222	0.00360229	0.000520138	0.453422	0.541837	0.0219241	5.63e-05	0.445763	0.532684	0.0215537
SEL1-10E c4	60	50.28	31.4	0.662	0.0196	14.23	3.39	0.2062	0	100.188	69.1623	42.7638	SEL1-10E c4		2.29442	1.68892	0.0252645	0.000757607	0.695787	0.299956	0.0120046	0	0.690438	0.29765	0.0119123
SEL1-10E c4	61	48.95	31.95	0.2981	0	15.73	2.576	0.1524	0.0042	99.6607	69.3823	42.3198	SEL1-10E c4		2.24937	1.73054	0.0114564	0	0.774519	0.229528	0.00893461	0.000152607	0.764593	0.226587	0.00882011
SEL1-10E c4	62	51.9	29.75	1.1012	0	10.33	4.09	0.3858	0.0108	97.5678	69.3538	42.2695	SEL1-10E c4		2.40538	1.62519	0.0426833	0	0.512992	0.367553	0.0228118	0.000395783	0.567873	0.406875	0.0252523
SEL1-10E circ 5	63	58.31	25.8	0.4817	0.0114	8.51	6.35	0.7351	0	100.198	69.0678	35.5842	SEL1-10E circ 5		2.61492	1.36376	0.0180662	0.000433043	0.40892	0.552165	0.0420574	0	0.407639	0.550435	0.0419256
SEL1-10E circ 5	64	55.56	27.44	0.7613	0	7.86	5.53	0.6974	0.0071	97.8558	68.9843	35.6002	SEL1-10E circ 5		2.54704	1.48272	0.029188	0	0.386091	0.491563	0.0407884	0.000257365	0.420376	0.535213	0.0444104
SEL1-10E circ 5	65	55.88	27.17	0.0983	0.0079	9.85	5.82	0.5229	0	99.3491	68.8943	35.6215	SEL1-10E circ 5		2.53399	1.45225	0.00372802	0.00030345	0.478608	0.511744	0.0302517	0	0.468946	0.501413	0.029641
SEL1-10E circ 5	66	56.29	27.18	0.0113	0	9.7	5.89	0.492	0	99.5633	68.7931	35.683	SEL1-10E circ 5		2.54328	1.44749	0.000426989	0	0.469601	0.516011	0.0283602	0	0.46313	0.508901	0.0279694
SEL1-10E circ 5	67	56.7	26.76	0.1716	0.0195	9.36	6.08	0.5492	0	99.6403	68.6886	35.7722	SEL1-10E circ 5		2.56058	1.42444	0.0064811	0.000745936	0.452925	0.532402	0.0316423	0	0.445367	0.523519	0.0311143
SEL1-10E circ 5	68	55.78	26.74	0.0858	0	9.47	5.9	0.525	0.0099	98.5107	68.5013	35.8392	SEL1-10E circ 5		2.54815	1.43983	0.003278	0	0.463544	0.522611	0.0305976	0.000357601	0.455906	0.514001	0.0300934
SEL1-10E circ 5	69	55.16	26.76	0.1321	0	9.61	5.91	0.5285	0.001	98.1016	68.4171	35.9132	SEL1-10E circ 5		2.53451	1.4493	0.00507631	0	0.473137	0.526548	0.030981	3.63e-05	0.45906	0.510881	0.0300592
SEL1-10E circ 5	70	56.1	27.26	0.1843	0.0412	9.88	5.73	0.5543	0.0105	99.7603	68.2936	35.947	SEL1-10E circ 5		2.53425	1.45149	0.00696286	0.0015765	0.478231	0.501906	0.0319457	0.000375053	0.472522	0.495914	0.0315644
SEL1-10E circ 5	71	56.04	27.12	0.1438	0.0157	9.7	5.82	0.5731	0.0061	99.4187	68.1333	35.9492	SEL1-10E circ 5		2.53902	1.44831	0.00544882	0.00060253	0.470906	0.511295	0.0331268	0.000218532	0.463797	0.503576	0.0326267
SEL1-10E circ 5	72	59.18	24.99	0.478	0.0216	7.72	6.75	0.8382	0.0118	99.9896	68.0353	36.04	SEL1-10E circ 5		2.65491	1.32143	0.017934	0.000820803	0.371096	0.587163	0.0479737	0.000418575	0.368797	0.583526	0.0476766
SEL1-10E circ 5	73	58	25.37	0.2627	0.0213	7.82	6.66	0.8922	0	99.0262	67.9211	36.0775	SEL1-10E circ 5		2.62892	1.35542	0.0099583	0.000817787	0.379796	0.585335	0.0515933	0	0.373549	0.575707	0.0507446
SEL1-10E circ 5	75	56.94	25.78	0.4083	0.0052	8.56	6.35	0.6777	0.004	98.7252	60.8241	29.6345	SEL1-10E circ 5		2.5945	1.38459	0.0155593	0.000200701	0.41793	0.561035	0.0393962	0.000144116	0.410395	0.550919	0.0386859
SEL1 13E circ 1 clear core	86	55.96	25.92	0.3252	0.0104	17.9	5.89	0.7882	0	106.794	12.1763	74.4442	SEL1 13E circ 1 clear core		2.44071	1.33253	0.0118622	0.000384223	0.83654	0.498121	0.0438588	0	0.606839	0.361345	0.0318159
SEL1 13E in poly xt region	88	48.71	31.38	0.5795	0	15.36	2.7355	0.213	0.0094	98.9874	12.3751	73.9532	SEL1 13E in poly xt region		2.25714	1.71394	0.0224579	0	0.76265	0.245786	0.0125922	0.000344417	0.746943	0.240724	0.0123328
SEL1 13E inclued in cpx	89	53.13	28.25	0.5929	0.0014	11.92	4.58	0.4817	0.0016	98.9576	11.3273	73.9488	SEL1 13E inclued in cpx		2.43959	1.52896	0.0227684	5.45e-05	0.586472	0.407777	0.0282185	5.81e-05	0.573585	0.398817	0.0275985
SEL1 13E sieve rim next to cpx	92	49.64	29.29	1.2897	0.0081	14.65	3.3	0.2201	0	98.3979	17.0378	70.0465	SEL1 13E sieve rim next to cpx		2.31978	1.61338	0.0504056	0.000320635	0.733578	0.299026	0.0131225	0	0.701501	0.285951	0.0125487
SEL 1-10i circ 1	94	57.12	25.24	0.1335	0	8.51	6.59	0.3961	0.0075	97.9971	25.4031	35.1705	SEL 1-10i circ 1		2.61499	1.36199	0.00511139	0	0.417451	0.58499	0.0231349	0.000271494	0.407041	0.570401	0.022558
SEL 1-10i circ 1	95	57.22	25.98	0.1203	0	8.95	6.29	0.3571	0	98.9174	25.2218	35.4828	SEL 1-10i circ 1		2.59515	1.38885	0.00456306	0	0.434943	0.553154	0.0206627	0	0.431166	0.548351	0.0204832
SEL 1-10i circ 1	95	57.2	25.8	0.561	0	9.37	5.54	0.8115	0.0026	99.2851	22.3741	66.0298	SEL 1-13E sieve rim		2.59386	1.37903	0.0212759	0	0.455286	0.487126	0.0469484	9.32e-05	0.460182	0.492364	0.0474533
SEL 1-10i circ 1	96	56.93	25.72	0.5353	0	9.15	6.15	0.3967	0.0059	98.8879	25.1478	35.772	SEL 1-10i circ 1		2.59054	1.3795	0.0203715	0	0.446134	0.542632	0.02303	0.000212285	0.440933	0.536306	0.0227615
SEL 1-10i circ 2	97	56.97	26.26	0.0984	0.0404	9.24	6.18	0.34	0.0005	99.1293	20.2956	38.7875	SEL 1-10i circ 2		2.58082	1.40219	0.00372805	0.00155026	0.448515	0.542851	0.0196504	1.79e-05	0.443628	0.536935	0.0194363
SEL 1-10i circ 2	98	57.04	26.06	0.0621	0.011	9.18	6.27	0.3493	0	98.9724	20.0933	38.7875	SEL 1-10i circ 2		2.58751	1.39341	0.00235597	0.000422675	0.446211	0.551507	0.0202154	0	0.43835	0.541791	0.0198593
SEL 1-10i circ 2	99	57.05	25.87	0.1085	0.018	8.98	6.31	0.3527	0	98.6892	19.9348	38.7875	SEL 1-10i circ 2		2.59451	1.38675	0.00412672	0.000693399	0.437593	0.556428	0.0204638	0	0.431345	0.548484	0.0201716
SEL 1-10i circ 2	100	57.19	25.57	0.12	0	9.02	6.36	0.3735	0	98.6335	19.7798	38.7875	SEL 1-10i circ 2		2.60312	1.37185	0.00456804	0	0.43992	0.561321	0.0216893	0	0.430059	0.548738	0.0212031
SEL 1-10i circ 2	101	56.09	25.92	0.2656	0	9.37	6.07	0.3582	0	98.0738	19.6671	38.7792	SEL 1-10i circ 2		2.57318	1.40159	0.0101903	0	0.460595	0.539951	0.0209649	0	0.450896	0.528581	0.0205234
SEL 1-10i circ 3	103	55.87	26.22	0.3756	0	9.63	5.97	0.3376	0	98.4032	5.4293	36.2705	SEL 1-10i circ 3		2.55794	1.41497	0.0143818	0	0.472425	0.529989	0.0197195	0	0.462195	0.518513	0.0192925
SEL 1-10i circ 3	104	55.82	26.29	0.3433	0.022	9.64	5.9	0.3339	0.0005	98.3497	5.4538	36.2772	SEL 1-10i circ 3		2.55629	1.4191	0.0131483	0.000853403	0.473033	0.523905	0.0195082	1.81e-05	0.465379	0.515428	0.0191926
SEL 1-10i circ 3	105	56.1	26.24	0.3756	0	9.63	5.98	0.3245	0	98.6501	5.4778	36.2922	SEL 1-10i circ 3		2.56119	1.41204	0.014341	0	0.471086	0.529372	0.0189006	0	0.462139	0.519319	0.0185417
SEL 1-10i circ 3	107	57.95	25.47	0.461	0	9.19	5.87	0.3804	0	99.3214	6.3131	35.356	SEL 1-10i circ 3		2.61775	1.35615	0.0174161	0	0.444821	0.514155	0.0219228	0	0.453483	0.524167	0.0223498
SEL 1-10i circ 3	108	58.12	25.48	0.503	0.005	9.22	5.92	0.3031	0.0021	99.5532	6.3131	35.3038	SEL 1-10i circ 3		2.61906	1.35339	0.0189567	0.000190854	0.44519	0.517276	0.0174256	7.48e-05	0.454326	0.527891	0.0177832
SEL 1-10i circ 3	109	57.91	26.1	0.3569	0	9.23	5.97	0.3822	0	99.9491	6.3286	35.2818	SEL1-11L circ 4		2.59998	1.38121	0.013401	0	0.444029	0.519722	0.0218921	0	0.450497	0.527292	0.022211
SEL 1-10i circ 3	110	57.49	25.86	0.3715	0.0022	9.05	6.2	0.384	0	99.3577	6.3131	35.2622	SEL 1-10i circ 3		2.5989	1.37793	0.0140453	8.42e-05	0.438369	0.543462	0.0221467	0	0.436632	0.541309	0.022059
SEL 1-10i circ 3	111	56.82	26.27	0.1804	0.0298	9.42	6.04	0.3319	0	99.0921	6.3131	35.1948	SEL 1-10i circ 3		2.57652	1.40409	0.0068414	0.00114462	0.457697	0.531068	0.0192009	0	0.45408	0.526871	0.0190491
SEL 1-10i circ 3	112	56.88	26.3	0.0897	0.008	9.4	6.1	0.3355	0.0045	99.1177	6.3131	35.121	SEL 1-10i circ 3		2.57745	1.40471	0.00339937	0.000307065	0.456407	0.53597	0.0193956	0.000161235	0.451096	0.529734	0.01917
SEL 1-10i circ 3	113	56.93	26.21	0.1071	0	9.21	6.19	0.304	0	98.9511	6.3131	35.0855	SEL 1-10i circ 3		2.58254	1.40144	0.00406322	0	0.447671	0.544473	0.0175938	0	0.443354	0.539222	0.0174241
SEL 1-10i circ 3	114	57.69	25.96	0.117	0.0147	9.14	6.33	0.3707	0	99.6224	6.3131	35.062	SEL 1-10i circ 3		2.5993	1.37868	0.00440876	0.000561027	0.441261	0.553018	0.0213088	0	0.434488	0.54453	0.0209817
SEL 1-10i circ 3	115	56.94	26.25	0.0481	0	9.27	6.13	0.3438	0.0115	98.9934	6.3131	35.0458	SEL 1-10i circ 3		2.58172	1.40289	0.00182395	0	0.450367	0.538931	0.0198875	0.000412294	0.446268	0.534026	0.0197065
SEL 1-10i circ 3	116	57.1	26.27	0.082	0	9.39	6.11	0.3412	0	99.2932	6.3131	34.976	SEL 1-10i circ 3		2.58199	1.40017	0.00310104	0	0.454965	0.535723	0.0196838	0	0.450295	0.530223	0.0194817
SEL 1-10i circ 3	117	57.02	26.48	0.1055	0	9.33	6.16	0.3256	0.0037	99.4248	6.3131	34.9285	SEL 1-10i circ 3		2.57532	1.40969	0.00398503	0	0.451523	0.539468	0.0187616	0.000132137	0.447162	0.534257	0.0185804
SEL 1-10i circ 3	118	56.48	26.52	0.123	0	9.54	6.12	0.3439	0.0141	99.141	6.3131	34.8198	SEL 1-10i circ 3		2.56228	1.4181	0.00466672	0	0.46374	0.538349	0.0199042	0.000505787	0.45376	0.526764	0.0194759
SEL1-11L circ 1	119	56.34	26.29	0.1642	0.0037	9.16	6.23	0.5961	0.0234	98.8074	51.6113	39.3685	SEL1-11L circ 1		2.56725	1.41203	0.00625748	0.000142812	0.44724	0.550452	0.0346538	0.00084311	0.433227	0.533205	0.033568
SEL1-11L circ 1	120	57.5	25.4	0.4065	0	8.23	6.67	0.6003	0.0047	98.8115	51.6223	39.1428	SEL1-11L circ 1		2.6148	1.36146	0.0154599	0	0.401018	0.588134	0.0348273	0.000168999	0.391627	0.574361	0.0340117
SEL1-11L circ 1	121	57.44	25.82	0.0986	0	8.39	6.79	0.4811	0.0056	99.0253	52.0626	38.267	SEL1-11L circ 1		2.60352	1.37944	0.00373764	0	0.407476	0.596755	0.0278203	0.000200702	0.394821	0.578222	0.0269564
SEL1-11L circ 1	122	57.49	25.91	0.1029	0	8.53	6.76	0.4245	0.0003	99.2177	52.0626	38.1048	SEL1-11L circ 1		2.60075	1.38158	0.00389312	0	0.413476	0.592972	0.0245	1.07e-05	0.401064	0.575172	0.0237645
SEL1-11L circ 1	123	57.29	26.61	0.3813	0	9.09	6.39	0.4729	0.0049	100.239	52.0911	37.927	SEL1-11L circ 1		2.5721	1.40817	0.014317	0	0.437287	0.556276	0.0270869	0.000173949	0.42844	0.545021	0.0265389
SEL1-11L circ 1	124	57.05	26.55	0.3708	0.0142	9.15	6.35	0.5889	0	100.074	52.3551	36.6885	SEL1-11L circ 1		2.56837	1.40886	0.013961	0.000541504	0.441385	0.554315	0.033824	0	0.428727	0.538419	0.032854
SEL1-11L circ 1	125	57.22	26.53	0.2654	0.021	9.08	6.29	0.5354	0	99.9418	52.2893	36.6885	SEL1-11L circ 1		2.57523	1.40737	0.00998952	0.000800568	0.437873	0.548908	0.0307417	0	0.430333	0.539455	0.0302123
SEL1-11L circ 1	126	57.28	26.63	0.2871	0.0034	9.02	6.46	0.5416	0.0026	100.225	52.2421	36.6885	SEL1-11L circ 1		2.57203	1.40944	0.0107816	0.000129319	0.433984	0.562453	0.0310265	9.23e-05	0.422384	0.547419	0.0301972
SEL1-11L circ 4	127	56.21	26.51	0.6918	0.013	8.97	6.13	0.4733	0	98.9981	52.1876	36.7032	SEL1-11L circ 4		2.55883	1.42246	0.026338	0.000501281	0.437536	0.541088	0.0274881	0	0.434878	0.537801	0.0273211
SEL1-11L circ 1	128	57.49	26.63	0.1848	0.0334	9.05	6.52	0.5076	0.0073	100.423	52.0833	36.669	SEL1-11L circ 1		2.57519	1.40602	0.006923	0.00126728	0.43437	0.566298	0.0290081	0.000258557	0.421851	0.549977	0.0281721
SEL1-11L circ 1	129	57.06	26.58	0.2592	0.0068	9.08	6.41	0.5005	0	99.8965	52.0468	36.669	SEL1-11L circ 1		2.57027	1.41125	0.00976465	0.000259458	0.438255	0.559867	0.0287628	0	0.426781	0.545209	0.0280098
SEL1-11L circ 1	130	57.01	26.47	0.257	0	9	6.45	0.5043	0.0019	99.6932	52.0003	36.669	SEL1-11L circ 1		2.573	1.40814	0.00970058	0	0.435237	0.564455	0.0290375	6.78e-05	0.423082	0.548691	0.0282266
SEL1-11L circ 4	131	55.97	26.44	0.5842	0.0124	9.09	5.9	0.6122	0	98.6088	51.9531	36.673	SEL1-11L circ 4		2.55809	1.42438	0.0223305	0.000480058	0.445163	0.522869	0.0356973	0	0.443509	0.520927	0.0355647
SEL1-11L circ 2	133	57.87	26.41	0.0845	0	8.8	6.58	0.4676	0	100.212	61.7408	41.306	SEL1-11L circ 2		2.59199	1.39428	0.00316528	0	0.422335	0.571461	0.02672	0	0.413845	0.559973	0.0261828
SEL1-11L circ 2	134	57.33	26.32	0.2546	0.0096	8.82	6.5	0.6044	0	99.8386	62.0096	41.2862	SEL1-11L circ 2		2.5831	1.39781	0.00959386	0.000366388	0.425816	0.567876	0.0347428	0	0.414043	0.552175	0.0337822
SEL1-11L circ 3	135	58.15	26.86	0.1698	0.0131	8.94	6.45	0.5174	0	101.1	68.8731	46.8308	SEL1-11L circ 3		2.58293	1.40628	0.00630778	0.000492885	0.425495	0.555525	0.0293205	0	0.421141	0.549839	0.0290204
SEL1-11L circ 3	136	56.67	26.15	0.1162	0	8.61	6.7	0.4717	0	98.7179	68.8731	46.327	SEL1-11L circ 3		2.5804	1.40348	0.00442502	0	0.420079	0.591546	0.0274019	0	0.4043	0.569327	0.0263726
SEL1-11L circ 3	137	55.36	27.23	0.2687	0.0069	8.2	6.3	0.4642	0	97.8298	68.7498	46.0865	SEL1-11L circ 3		2.54113	1.47326	0.0103151	0.000268281	0.40331	0.560727	0.0271842	0	0.406882	0.565693	0.027425
SEL1-11L circ 3	138	57.68	26.47	0.0958	0.0235	8.8	6.58	0.4843	0	100.134	68.6156	45.924	SEL1-11L circ 3		2.58687	1.39928	0.00359327	0.000892747	0.422889	0.572211	0.0277105	0	0.413458	0.55945	0.0270926
SEL1-11L circ 3	139	58.31	26.62	0.1467	0	8.72	6.52	0.6135	0	100.93	68.6156	45.6335	SEL1-11L circ 3		2.59351	1.39558	0.00545696	0	0.415581	0.562307	0.034813	0	0.410369	0.555255	0.0343764
SEL1-11L circ 3	140	57.37	26.68	0.1414	0	8.91	6.46	0.5345	0	100.096	68.6348	45.4612	SEL1-11L circ 3		2.57581	1.41194	0.0053095	0	0.428648	0.562396	0.0306167	0	0.41956	0.550472	0.0299676
SEL1-11L circ 4	141	58.32	26.53	0.1108	0.007	8.86	6.53	0.4579	0	100.816	69.4206	37.727	SEL1-11L circ 4		2.59544	1.39166	0.00412391	0.000263878	0.422495	0.563492	0.0259983	0	0.417491	0.556818	0.0256904
SEL1-11L circ 4	142	57.81	26.74	0.0682	0	9.01	6.31	0.5169	0.0049	100.46	69.4206	37.567	SEL1-11L circ 4		2.58279	1.40815	0.00254828	0	0.431326	0.546634	0.0294628	0.000173101	0.428148	0.542606	0.0292457
SEL1-11L circ 4	143	58.27	26.66	0.1203	0	8.96	6.43	0.5341	0	100.974	69.5881	37.4372	SEL1-11L circ 4		2.59047	1.397	0.00447275	0	0.426811	0.554274	0.0302926	0	0.422009	0.548039	0.0299518
SEL1-11L circ 4	144	58.46	26.7	0.2507	0.007	8.83	6.46	0.6245	0	101.332	69.7003	37.252	SEL1-11L circ 4		2.59152	1.39512	0.0092945	0.000262849	0.419422	0.555277	0.0353192	0	0.415262	0.549769	0.0349688

## Sheet: Trace element analyses
Sample	Kcode	Mg	Si	Ca	Sc	Ti	V	Cr	Co	Ni	Rb	Sr	Y	Zr	Nb	La	Ce	Pr	Nd	Sm	Eu	Gd	Tb	Dy	Ho	Er	Tm	Yb	Lu	Hf
SEL-1-11-L-1-Plag - 4	1	131	264000	58300	1.16	197	23.4	6.4	0.84	8.9	1.82	1854	0.53	3.65	2.41	2.15	1.75	0.198	0.84	0.035	0.038	0.105	0	0.066	0.015	0.033	0	0.075	0.0018	0
SEL-1-11-L-1-Plag - 6	1	100	268000	59400	1.13	285	83	3.9	4.32	9.8	3.8	1977	0.76	2.89	7.8	2.96	2.14	0.221	1.08	0.14	0.115	0	0.012	0.141	0.018	0.077	0	0	0.031	0
SEL-1-11-L-1-Plag - 7	1	90	268000	59900	1.04	38	26.6	2.7	3.4	11.9	1.64	1997	0.59	0.094	0.087	1.96	2.55	0.264	1.16	0.087	0.064	0.097	0	0	0.017	0	0	0.051	0	0
SEL-1-13H-7-Plag - 19	5	169.1	240000	113000	0.58	46.2	0.25	2.3	0.41	-0.22	0.14	377.6	0.379	0.143	0	3.77	5.56	0.422	1.67	0.25	0.58	0	0	0	0	0	0	0	0	0
SEL-1-13H-2-Plag - 3	5	149.7	232000	112000	0.56	10.9	0.35	0.9	0.176	-0.19	-0.01	400.3	0.46	0.086	0	1.85	3.62	0.368	1.06	0.12	0.59	0	0	0.031	0	0	0	0	0	0
SEL-1-13H-5-Plag - 6	5	185.5	238000	103000	0.47	15.3	0.09	0.1	0.39	0.3	0.44	473.8	0.8	0	0	3.06	5.57	0.53	2.2	0.22	0.92	0.22	0.042	0.112	0.027	0	0	0	0	0
SEL-1-13H-1-Plag - 1	5	148.3	236000	114000	0.63	14	-0.09	1.5	0.24	0.55	-0.2	356.6	0.84	0	0	2.82	5.81	0.477	1.73	0.22	0.56	0.11	0.029	0	0.018	0.043	0	0	0	0
SEL-1-13H-6-Plag - 3	5	173.9	237000	108000	0.81	11.2	-0.18	-0.1	0.29	0.66	0.18	443.4	0.77	0	0	2.83	5.05	0.468	1.56	0.27	0.85	0.052	0.04	0.161	0.026	0	0	0	0	0
SEL-1-13H-5-Plag - 1	5	194.8	251000	102000	0.82	18.1	0.49	2.3	0.24	0.79	0.4	548.4	0.39	0.29	0.049	2.42	3.81	0.309	1.09	0.15	0.54	0	0	0	0	0	0	0	0	0
SEL-1-13H-7-Plag - 2	5	194.6	242000	105000	0.76	54.3	0.68	1.3	0.3	1.41	-0.04	490.6	0.301	0.83	0.53	1.92	2.87	0.311	0.73	0.058	0.49	0	0	0	0	0.034	0	0	0	0.011
SEL-1-13H-1-Plag - 2	5	158.1	235000	117000	0.68	40.6	0.58	1.1	0.196	2.37	0.15	313.9	0.4	0.66	0.123	4.05	7.33	0.64	2.27	0.25	0.77	0.15	0.008	0.051	0	0	0	0	0	0
SEL-1-10I-2-PX - 7	2	58.7	255000	57700	0.78	11	0.06	2.9	0.185	-0.21	0.28	785	0.067	0	0	0.97	1.47	0.117	0.39	0	0.103	0	0	0	0	0	0	0	0	0
SEL-1-10I-1-PX - 2	2	17.9	262000	57400	0.48	29.4	-0.021	-0.5	0.119	-0.18	0.33	800	0.074	0	0	2.47	3.64	0.315	1.15	0	0.143	0	0	0	0	0	0	0	0	0
SEL-1-10I-3-PX - 3	2	31.1	257000	61300	0.46	13.5	-0.17	1.7	0.156	0.05	0.46	747	0.029	0	0	0.78	1.08	0.094	0.29	0	0.156	0	0	0	0	0	0	0	0	0
SEL-1-10I-3-PX - 2	2	68.3	256000	61800	0.35	10.5	0.1	4.1	0.18	0.14	0.51	747	0.182	0	0	1.98	3.17	0.241	0.8	0	0.28	0	0	0	0.007	0	0	0	0	0
All values in ppm
