# Supplementary material for: New evidence for upper Permian crustal growth below Eifel, Germany, from mafic granulite xenoliths
Source: Copernicus journal article supplement (doi:10.5194/ejm-33-233-2021), 2021-04-29
Supplement: Supplementary file 3 [file Electronuic Appendix S1_ U-Pb analysis and interpretation of titanite.xls]

## Sheet: filtered
Sample	Zr (ppm)	U (ppm)	Th (ppm)	204PbCps	2σ int	%	206Pbcps/	%Pb*	207Pb/	2σ	206Pb/	2σ	err.	206Pb/	2σ
							204PbCps		235U		238U		corr.	238U Ma
Sample 13E
SEL-1-13-E - 4	962.1	301.56	251.8	121	23	19.0083	305.95	96.02	0.118	0.039	0.02665	0.00048	0.73621	169.5	3
SEL-1-13-E - 5	922.8	316.7	265.18	154	18	11.6883	258.052	93.98	0.141	0.031	0.02692	0.00044	0.74079	171.3	2.8
SEL-1-13-E - 6	963.4	241.54	355.8	99	17	17.1717	415.152	96.03	0.229	0.055	0.03668	0.0008	0.89237	232.2	5
SEL-1-13-E - 7	999.3	250.12	374.4	95	19	20	428.842	96.1	0.221	0.042	0.03573	0.0006	0.83975	226.3	3.8
SEL-1-13-E - 8	897.6	219.59	238.8	119	23	19.3277	352.521	96.49	0.205	0.053	0.04105	0.00079	0.91718	259.3	4.9
SEL-1-13-E - 9	1112.8	176.04	97.52	102	19	18.6275	327.157	95.27	0.231	0.054	0.03993	0.00074	0.85589	252.4	4.6
SEL-1-13-E - 10	1036.3	178.12	79.51	89	20	22.4719	367.753	95.68	0.25	0.055	0.03913	0.00081	0.80714	247.4	5
SEL-1-13-E - 11	1028.5	265.3	330.7	113	20	17.6991	379.469	96.42	0.187	0.038	0.03403	0.00052	0.78513	215.7	3.3
SEL-1-13-E - 12	934.8	241.23	244.1	116	18	15.5172	361.034	96.01	0.217	0.039	0.03727	0.00062	0.79519	235.9	3.8
SEL-1-13-E - 13	1201.1	315.6	326.7	114	21	18.4211	422.807	96.55	0.188	0.036	0.03245	0.00051	0.81516	205.9	3.2
SEL-1-13-E - 14	1298.4	323.7	359.8	121	17	14.0496	436.281	96.97	0.2	0.029	0.03545	0.00046	0.72617	224.5	2.9
SEL-1-13-E - 15	1156.1	344.1	369.6	120	17	14.1667	429.667	96.66	0.187	0.025	0.03275	0.00042	0.6457	207.8	2.6
SEL-1-13-E - 16	708.5	320.1	369.1	71	18	25.3521	364.93	94.79	0.12	0.028	0.01776	0.00041	0.89588	113.5	2.6
SEL-1-13-E - 17	1222.5	316.3	271.2	92	18	19.5652	463.043	96.4	0.184	0.031	0.02902	0.0005	0.81052	184.4	3.1
SEL-1-13-E - 18	935.9	206.17	113.02	94	22	23.4043	374.468	95.71	0.23	0.056	0.03625	0.00081	0.83405	229.5	5
SEL-1-13-E - 19	960.2	311	280.5	113	27	23.8938	304.336	95.16	0.123	0.037	0.02348	0.00046	0.88886	149.6	2.9
SEL-1-13-E - 20	808.8	311.2	340.6	114	22	19.2982	196.579	93.92	0.04	0.032	0.01464	0.00041	0.83291	93.7	2.6
SEL-1-13-E - 21	1175.1	340.6	356.6	110	16	14.5455	466.455	97.25	0.187	0.025	0.0329	0.00041	0.67162	208.7	2.6
SEL-1-13-E - 22	1026.1	313.4	312.6	114	21	18.4211	400.965	96.21	0.183	0.031	0.03115	0.00051	0.85098	197.7	3.2
SEL-1-13-E - 23	549.9	123.6	389.8	129	16	12.4031	161.705	92.93	0.044	0.072	0.03439	0.00083	0.76735	217.9	5.2
SEL-1-13-E - 24	1262.3	348.91	324.1	117	20	17.094	421.88	97.16	0.161	0.029	0.03087	0.00051	0.66451	196	3.2
SEL-1-13-E - 25	1135.9	253	259.5	119	21	17.6471	355.798	96.54	0.181	0.044	0.03597	0.00062	0.93238	227.8	3.9
SEL-1-13-E - 26	1016.3	212.06	127.79	88	18	20.4545	453.977	96.71	0.253	0.043	0.04078	0.00061	0.79984	257.6	3.8
SEL-1-13-E - 27	880.9	212.59	256.5	109	22	20.1835	376.972	96.51	0.23	0.05	0.04183	0.00074	0.95375	264.2	4.6
SEL-1-13-E - 28	1176	306.97	322.3	118	20	16.9492	421.356	97.15	0.192	0.037	0.03521	0.00054	0.20535	223.1	3.4
SEL-1-13-E - 29	912.5	266.4	151.56	97	19	19.5876	403.093	96.34	0.195	0.037	0.03252	0.00054	0.78451	206.3	3.4
SEL-1-13-E - 30	1069.2	206.73	181.6	127	18	14.1732	256.142	95.41	0.123	0.048	0.03383	0.00068	0.55501	214.4	4.2
SEL-1-13-E - 31	917	267.1	217.7	156	20	12.8205	271.346	96.08	0.129	0.034	0.03368	0.00055	0.82544	213.6	3.4
SEL-1-13-E - 32	1137.6	225.16	226.7	103	19	18.4466	335.243	95.96	0.178	0.045	0.03371	0.0007	0.8874	213.7	4.4
SEL-1-13-E - 33	1106.4	239.02	232.48	105	18	17.1429	351.714	96.43	0.167	0.039	0.03333	0.00068	0.91472	211.3	4.2
SEL-1-13-E - 34	1086.7	231.37	226.39	100	21	21	382.9	96.61	0.193	0.047	0.03595	0.00076	0.87447	227.7	4.7
SEL-1-13-E - 35	1053	224.08	228.2	109	22	20.1835	345.138	96.33	0.177	0.043	0.03586	0.00064	0.88668	227.1	4
SEL-1-13-E - 36	965.7	276.66	270.5	101	19	18.8119	323.762	96.23	0.115	0.036	0.02561	0.00051	0.73174	163	3.2				266.2	1.4		267.6	264.8
SEL-1-13-E - 37	1099.3	259.56	167.94	102	20	19.6078	401.471	96.66	0.184	0.04	0.03444	0.00062	0.86198	218.3	3.9				259.4	4.7		264.1	254.7
SEL-1-13-E - 38	1483	288.15	416.8	113	19	16.8142	397.345	97.06	0.167	0.036	0.03442	0.00056	0.73919	218.1	3.5
SEL-1-13-E - 39	813.5	290.33	393.5	93	17	18.2796	310.538	95.81	0.097	0.03	0.02111	0.00041	0.90933	134.7	2.6				253.7	2.6
SEL-1-13-E - 40	974.1	287.1	266	101	21	20.7921	289.901	93.92	0.143	0.032	0.02254	0.00045	0.87525	143.7	2.8
SEL-1-13-E - 41	1100.5	217.44	209.1	95	18	18.9474	388.842	96.38	0.227	0.05	0.03757	0.00066	0.8485	237.7	4.1
SEL-1-13-E - 42	1098.6	207.78	200.21	85	18	21.1765	456.353	97.13	0.226	0.049	0.04161	0.00071	0.83193	262.8	4.4
SEL-1-13-E - 43	1013.2	218.8	241.1	124	22	17.7419	249.355	95.3	0.129	0.045	0.03094	0.0006	0.85285	196.4	3.7
SEL-1-13-E - 44	1004.5	275.2	250.1	93	20	21.5054	436.989	96.56	0.194	0.033	0.0327	0.00047	0.83915	207.4	2.9
SEL-1-13-E - 45	792.8	277.93	456.6	114	17	14.9123	422.018	96.53	0.226	0.033	0.03871	0.00056	0.72784	244.8	3.5
Sample 11L
SEL-1-11-L - 1	685.8	24.02	100.86	104	17	16.3462	44.125	68.7	-0.4	0.39	0.0275	0.0032	0.87148	174	20
SEL-1-11-L - 2	663	22.83	162.2	121	20	16.5289	36.0909	66.99	-0.69	0.45	0.0237	0.0039	0.98616	153	24
SEL-1-11-L - 3	665	25.66	119.19	125	27	21.6	41.04	69.3	-0.48	0.45	0.0308	0.0034	0.96736	195	21
SEL-1-11-L - 4	675.1	20.79	172.3	119	35	29.4118	37.9412	64	-0.47	0.96	0.0298	0.0044	0.98732	188	25
SEL-1-11-L - 5	652.3	24.78	143.15	112	21	18.75	26.5089	51	-0.44	0.42	0.0111	0.0036	0.97544	71	23
SEL-1-11-L - 6	682	26.51	135	121	21	17.3554	42.5207	69.98	-0.45	0.42	0.0281	0.0037	0.98059	178	23
SEL-1-11-L - 7	584.7	21.32	82.11	110	17	15.4545	43.9727	68.74	-0.38	0.4	0.0336	0.0034	0.96961	213	21
SEL-1-11-L - 8	462.7	11.898	69.36	148	21	14.1892	23.2432	56.9	-2.43	0.93	0.0211	0.0074	0.98416	136	46
SEL-1-11-L - 9	701.4	26.87	128.37	126	20	15.873	39.6032	70.15	-0.64	0.39	0.0255	0.0036	0.97994	162	23
SEL-1-11-L - 10	680.4	20.267	160.26	124	17	13.7097	39.3629	67.63	-0.47	0.4	0.0338	0.0035	0.97213	216	21
SEL-1-11-L - 11	569.1	17.271	122.21	109	18	16.5138	38.7156	64	-0.39	0.55	0.0338	0.0044	0.96716	213	28
SEL-1-11-L - 12	769.1	22.66	169.9	128	20	15.625	45.1484	69.65	-0.43	0.44	0.038	0.0039	0.94958	240	24
SEL-1-11-L - 13	340.1	6.703	28.75	113	17	15.0442	23.7434	51.41	-1.1	1.2	0.0339	0.0098	0.97938	216	62
SEL-1-11-L - 14	390	9.25	41.86	111	27	24.3243	27.8378	52.7	-1.1	1	0.0327	0.0077	0.98309	204	48
SEL-1-11-L - 15	720.2	22.69	141.6	120	19	15.8333	35.875	67	-0.7	0.45	0.0248	0.004	0.76878	159	25
SEL-1-11-L - 16	761.5	23.7	199.4	109	34	31.1927	49.8165	71.2	-0.23	0.64	0.0355	0.0068	0.98799	224	38
SEL-1-11-L - 17	663.4	22.54	111.9	128	15	11.7188	36.9219	63.73	-0.49	0.37	0.0269	0.0034	0.97374	176	21
SEL-1-11-L - 18	572.1	19.62	71.46	84	19	22.619	57.4762	68.3	0.15	0.51	0.0405	0.0044	0.90242	255	27
SEL-1-11-L - 19	599.8	20.49	65.2	97	18	18.5567	46.2371	66.8	-0.12	0.46	0.0333	0.0039	0.97082	210	24
SEL-1-11-L - 20	532.9	18.8	55.64	125	19	15.2	33.792	65.2	-1.09	0.5	0.0252	0.0043	0.97378	160	27
SEL-1-11-L - 21	656.7	20.9	108.88	109	19	17.4312	36.3945	63.4	-0.55	0.49	0.0253	0.0042	0.98906	160	26
SEL-1-11-L - 22	514.5	17.93	57.18	126	38	30.1587	31.1111	53	-0.7	0.84	0.032	0.0063	0.95497	201	39
SEL-1-11-L - 23	706.3	26.39	119.3	108	18	16.6667	43.463	71.56	-0.47	0.38	0.0265	0.0034	0.98598	168	21
SEL-1-11-L - 24	602.2	19.8	125.95	121	19	15.7025	35.5041	65.3	-0.88	0.51	0.0277	0.0039	0.97573	175	25
SEL-1-11-L - 25	586.8	21.93	69.22	130	21	16.1538	35.2231	68.4	-0.89	0.49	0.0269	0.0044	0.97296	170	28
SEL-1-11-L - 26	603.4	20.69	120.5	128	19	14.8438	35.6328	67.1	-0.88	0.46	0.0283	0.0045	0.97312	179	28
SEL-1-11-L - 27	714.6	22.32	191.14	134	19	14.1791	21.6791	46	-0.7	0.45	0.0082	0.0035	0.98008	52	22
SEL-1-11-L - 28	804	21.97	132.7	136	20	14.7059	38.5662	67.4	-0.64	0.45	0.0327	0.0041	0.97694	207	25
SEL-1-11-L - 29	798.8	23.09	137.08	111	22	19.8198	40.8739	67.6	-0.35	0.49	0.028	0.004	0.97719	183	25
SEL-1-11-L - 30	691.9	25.5	124.95	108	18	16.6667	32.8519	60.9	-0.54	0.36	0.0151	0.0032	0.9868	101	20
SEL-1-11-L - 31	680.1	26.51	126.12	112	22	19.6429	30.3125	58.8	-0.52	0.39	0.0139	0.0033	0.97326	88	21
SEL-1-11-L - 32	663.6	21.12	129.8	138	22	15.942	32.5797	66.5	-1.13	0.57	0.0257	0.0048	0.9893	162	30
SEL-1-11-L - 33	715.6	25.24	145.1	100	16	16	49.49	70.92	-0.24	0.34	0.0311	0.0031	0.96878	197	20
SEL-1-11-L - 34	638.9	20.03	130.4	115	19	16.5217	37.913	66.1	-0.7	0.51	0.0291	0.0043	0.9681	184	27
SEL-1-11-L - 35	672.7	22.86	174.1	118	20	16.9492	27.7627	58.8	-0.84	0.42	0.0142	0.0032	0.97686	93	20
SEL-1-11-L - 36	618	24.52	133.63	120	19	15.8333	46.8917	70.44	-0.46	0.43	0.0361	0.0036	0.97693	228	23
SEL-1-11-L - 37	737.4	22.79	167.06	129	22	17.0543	41.1163	68.8	-0.67	0.49	0.0335	0.0043	0.9756	214	27
SEL-1-11-L - 38	628.8	22.92	97.4	119	20	16.8067	40.1429	69.7	-0.59	0.45	0.0303	0.0037	0.95883	197	23
SEL-1-11-L - 39	481.2	14.932	47.98	110	15	13.6364	33.1182	62.2	-0.85	0.51	0.0302	0.0042	0.96834	191	27
SEL-1-11-L - 40	571.1	18.852	66.04	126	21	16.6667	36.5873	67	-0.95	0.6	0.0324	0.0048	0.94156	204	30
SEL-1-11-L - 41	652.6	25.36	136.4	90	21	23.3333	41.0778	63.2	-0.22	0.39	0.0208	0.0031	0.97467	132	19
SEL-1-11-L - 42	702.6	24.33	118.83	100	18	18	42.58	67	-0.32	0.37	0.0264	0.0035	0.76499	167	22
SEL-1-11-L - 43	677.5	24.05	156.9	87	17	19.5402	42.7586	61.6	-0.04	0.39	0.0229	0.0033	0.95967	145	21
SEL-1-11-L - 44	671.5	20.7	129.7	132	20	15.1515	41.4394	63.5	-0.22	0.49	0.0382	0.0044	0.97468	241	27
SEL-1-11-L - 45	699.2	23.14	141.81	114	18	15.7895	40.5789	68.1	-0.51	0.42	0.0286	0.0036	0.93747	183	22
Sample 10E
SEL-1-10-E - 1	694.6	345.2	827.9	101	27	26.7327	455.149	96.25	0.207	0.032	0.03149	0.00047	0.73761	199.8	2.9
SEL-1-10-E - 2	715.2	354.1	803.3	94	16	17.0213	475.319	96.08	0.209	0.027	0.03031	0.00045	0.74807	192.5	2.8
SEL-1-10-E - 3	671.1	282.3	804.4	110	18	16.3636	407.091	96.03	0.241	0.04	0.03775	0.00057	0.756	238.9	3.6
SEL-1-10-E - 4	665.4	208.98	606.9	115	19	16.5217	307.043	94.93	0.236	0.053	0.03971	0.00071	0.85177	251	4.4
SEL-1-10-E - 5	1021.1	297.5	484.2	128	18	14.0625	330.938	95.97	0.172	0.034	0.03371	0.00059	0.79985	213.7	3.7
SEL-1-10-E - 6	591.5	381.3	657.2	99	15	15.1515	393.535	96.22	0.139	0.024	0.02484	0.00038	0.81256	158.2	2.4
SEL-1-10-E - 7	295.5	326.2	306	116	23	19.8276	121.034	89.08	0.002	0.031	0.00889	0.00071	0.69967	57.1	4.5
SEL-1-10-E - 8	675	350.9	589.3	134	20	14.9254	266.94	95.27	0.096	0.032	0.02387	0.00047	0.86374	152.1	3
SEL-1-10-E - 9	590.9	394.2	547.1	103	21	20.3883	523.398	96.72	0.211	0.031	0.03273	0.00052	0.8125	207.6	3.2
SEL-1-10-E - 10	309.5	36.35	71	114	17	14.9123	53.614	75.68	-0.34	0.27	0.0281	0.0025	0.96945	180	16
SEL-1-10-E - 11	719.5	226.4	391.4	134	19	14.1791	269.552	95	0.174	0.05	0.0369	0.00067	0.84073	233.6	4.2
SEL-1-10-E - 12	799	248.14	531.5	113	18	15.9292	305.044	95.17	0.17	0.043	0.03253	0.00061	0.82116	206.4	3.8
SEL-1-10-E - 13	230.4	46.19	51.82	73	21	28.7671	103.205	80.67	0.28	0.23	0.0334	0.002	0.96605	212	12
SEL-1-10-E - 14	347	32.37	108.09	121	18	14.876	43.3471	65.4	-0.18	0.32	0.0246	0.0027	0.91953	156	17
SEL-1-10-E - 15	373.9	26.73	221.8	102	20	19.6078	48.1569	65.7	-0.08	0.39	0.03	0.0032	0.87193	190	20
SEL-1-10-E - 16	355.7	63.62	265	113	20	17.6991	37.8761	67.3	-0.25	0.18	0.0092	0.0014	0.97419	60.1	8.9
SEL-1-10-E - 17	349.1	51.18	225.7	94	18	19.1489	60.0851	73.43	-0.03	0.18	0.0192	0.0019	0.96587	124	11
SEL-1-10-E - 18	323	14.46	10.5	98	18	18.3673	22.7755	47.7	-0.81	0.61	0.0119	0.0048	0.97953	74	31
SEL-1-10-E - 19	679.7	295.3	851	138	18	13.0435	306.739	95.76	0.162	0.037	0.03461	0.00058	0.80877	219.3	3.6
SEL-1-10-E - 20	743.7	293.5	876.7	136	18	13.2353	306.397	96.02	0.154	0.03	0.03401	0.00046	0.64464	215.6	2.9
SEL-1-10-E - 21	317.6	27.54	47.61	108	19	17.5926	44.1944	66.7	-0.37	0.48	0.0271	0.003	0.43789	172	19
SEL-1-10-E - 22	330.5	60.93	63.56	90	19	21.1111	65.7667	76.4	-0.03	0.16	0.0178	0.0015	0.93608	113.7	9.7
SEL-1-10-E - 23	255.6	17.52	39.73	112	19	16.9643	36.0089	62.3	-0.58	0.57	0.0306	0.0045	0.97684	193	29
SEL-1-10-E - 24	274.8	38	74.9	86	17	19.7674	18.7093	34.9	-0.25	0.25	0.0013	0.0019	0.98705	8	12
SEL-1-10-E - 25	381.1	144.09	67.55	99	19	19.1919	116.667	85.87	0.075	0.081	0.01848	0.00089	0.95936	118	5.7
SEL-1-10-E - 26	311.2	39.58	41.97	105	17	16.1905	30.1905	49	-0.14	0.21	0.009	0.0019	0.98044	58	11
SEL-1-10-E - 27	268.3	19.15	17.91	112	21	18.75	38.0446	62.51	-0.49	0.62	0.0321	0.0049	0.9836	202	31
SEL-1-10-E - 28	1005.1	272.59	539.2	130	20	15.3846	320.462	95.75	0.171	0.04	0.03563	0.00064	0.49135	225.6	4
SEL-1-10-E - 29	1002.4	333.3	578.6	114	18	15.7895	374.825	96.02	0.176	0.033	0.03063	0.00055	0.82039	194.5	3.5
SEL-1-10-E - 30	208.9	14.5	48.27	101	20	19.802	20.9604	48.6	-1.21	0.77	0.008	0.0059	0.99	54	38

## Sheet: PlotDat10
		0.0248	0.00348	0.0199169	0.00310732	0.020923	0.00326294	0.0219302	0.00341858	0.0229384	0.00357425	0.0191997	0.003	0.0192282	0.003	0.0191714	0.003	0.0188883	0.00295172	0.0289612	0.00348102	0.0283089	0.00326022	0.0258045	0.00328964	0.025094	0.00326615	0.0269164	0.00343928	0.025594	0.00323151	0.0260612	0.00339921	0.0256821	0.00338952	0.0258074	0.00329124	0.025794	0.00334937	0.0279731	0.00337159	0.0243925	0.00332957	0.0239373	0.00345008	0.0233972	0.00335303
		0.0217	0.00326	0.0199159	0.00310847	0.020922	0.00326414	0.0219291	0.00341984	0.0229373	0.00357557	0.0191997	0.003	0.0193554	0.00301969	0.0191997	0.0030044	0.0198923	0.00310732	0.0289207	0.00349702	0.0282807	0.00327716	0.0257723	0.00330587	0.0250571	0.00328651	0.0268782	0.00345764	0.025557	0.00325006	0.0260434	0.00341382	0.0256511	0.00340372	0.0257839	0.00330818	0.025757	0.00336797	0.0279527	0.00338618	0.0243662	0.00334536	0.0239087	0.00346881	0.0233797	0.00336055
		0.0225	0.003281	0.0199129	0.00310952	0.0209189	0.00326525	0.0219259	0.003421	0.0229339	0.00357678	0.0193554	0.00302413	0.0195111	0.00304379	0.0193554	0.00302857	0.0208972	0.00326294	0.0288	0.00351269	0.0281964	0.00329395	0.0256764	0.00332161	0.024947	0.00330636	0.0267645	0.00347526	0.0254469	0.00326803	0.0259903	0.00342824	0.0255587	0.00341749	0.0257136	0.00332496	0.0256469	0.00338602	0.0278918	0.00340055	0.0242881	0.0033606	0.0238235	0.00348718	0.0233278	0.00336778
		0.0213	0.00326	0.0199084	0.0031104	0.0209141	0.00326617	0.0219209	0.00342197	0.0229286	0.00357779	0.0195111	0.00304826	0.0196668	0.00306788	0.0195111	0.00305273	0.0219031	0.00341858	0.0286014	0.00352773	0.0280566	0.00331045	0.0255186	0.00333656	0.0247659	0.0033253	0.0265775	0.00349181	0.0252658	0.00328507	0.0259022	0.00344232	0.0254069	0.00343057	0.0255972	0.00334144	0.0254659	0.00340318	0.0277908	0.00341457	0.0241595	0.003375	0.0236834	0.00350483	0.0232429	0.00337453
		0.023	0.00342	0.0199025	0.00311102	0.0209079	0.00326683	0.0219144	0.00342266	0.0229218	0.00357851	0.0196668	0.00307239	0.0198226	0.00309198	0.0196668	0.0030769	0.02291	0.00357425	0.0283289	0.00354183	0.0278626	0.00332652	0.0253022	0.00335042	0.0245174	0.00334297	0.0263209	0.00350696	0.0250173	0.00330084	0.02578	0.00345597	0.0251984	0.00344271	0.0254355	0.00335748	0.0252173	0.00341911	0.0276506	0.00342813	0.0239831	0.00338826	0.023491	0.00352141	0.0231272	0.00338061
		0.0218	0.00322	0.0198958	0.00311135	0.0209009	0.00326717	0.021907	0.00342302	0.0229141	0.00357889	0.0198226	0.00309652	0.0199784	0.00311608	0.0198226	0.00310106	IsoLine	IsoLine	0.0279876	0.00355473	0.0276161	0.00334202	0.0250312	0.00336294	0.0242062	0.00335903	0.0259997	0.00352042	0.0247061	0.00331503	0.0256248	0.00346904	0.0249375	0.00345367	0.02523	0.00337294	0.0249062	0.0034335	0.0274725	0.00344111	0.0237622	0.00340014	0.0232501	0.0035366	0.022984	0.00338586
		0.0219	0.00339	0.0198888	0.00311135	0.0208935	0.00326717	0.0218993	0.00342302	0.022906	0.00357889	0.0199784	0.00312065	0.0201342	0.00314017	0.0199784	0.00312523			0.0275843	0.00356618	0.027319	0.00335683	0.0247109	0.00337386	0.0238385	0.00337316	0.0256201	0.00353192	0.0243384	0.00332738	0.0254377	0.00348145	0.024629	0.00346323	0.0249825	0.0033877	0.0245384	0.00344607	0.027258	0.00345339	0.0235013	0.00341039	0.0229654	0.0035501	0.0228171	0.00339014
		0.0225	0.003382	0.0198821	0.00311102	0.0208865	0.00326683	0.0218919	0.00342266	0.0228983	0.00357851	0.0201342	0.00314479	0.02029	0.00316427	0.0201342	0.0031494			0.0271269	0.00357594	0.026974	0.00337081	0.0243476	0.00338297	0.0234214	0.00338509	0.0251895	0.00354124	0.0239212	0.00333764	0.0252205	0.00349307	0.0242792	0.00347121	0.024695	0.00340162	0.0241213	0.00345658	0.0270088	0.00346488	0.0232052	0.00341883	0.0226425	0.00356165	0.0226311	0.00339333
		0.0203	0.00329	0.0198762	0.0031104	0.0208803	0.00326617	0.0218854	0.00342197	0.0228915	0.00357779	0.02029	0.00316892	0.0204458	0.00318837	0.02029	0.00317357			0.0266241	0.00358385	0.026584	0.00338384	0.0239483	0.0033901	0.022963	0.00339458	0.0247162	0.00354821	0.0234628	0.0033456	0.0249749	0.00350381	0.0238947	0.00347745	0.02437	0.00341459	0.0236629	0.00346481	0.0267271	0.00347547	0.0228798	0.00342529	0.0222876	0.00357104	0.0224311	0.00339534
		0.022	0.00334	0.0198716	0.00310952	0.0208755	0.00326525	0.0218803	0.003421	0.0228862	0.00357678	0.0204458	0.00319305	0.0206017	0.00321247	0.0204458	0.00319774			0.0260858	0.00358973	0.0261524	0.00339582	0.0235208	0.00339511	0.0224722	0.00340145	0.0242096	0.00355268	0.022972	0.00335112	0.0247031	0.00351359	0.0234831	0.00348184	0.0240103	0.0034265	0.0231721	0.00347062	0.0264153	0.00348508	0.0225315	0.00342964	0.0219077	0.00357806	0.0222225	0.00339612
		0.0232	0.00336	0.0198687	0.00310847	0.0208724	0.00326414	0.0218771	0.00341984	0.0228828	0.00357557	0.0206017	0.00321719	0.0207576	0.00323657	0.0206017	0.00322191			0.0255226	0.00359347	0.0256828	0.00340663	0.0230735	0.00339789	0.0219586	0.00340557	0.0236794	0.00355456	0.0224584	0.00335409	0.0244074	0.0035223	0.0230523	0.00348428	0.0236189	0.00343725	0.0226585	0.00347389	0.0260761	0.00349362	0.022167	0.0034318	0.0215101	0.00358259	0.0220111	0.00339564
		0.0217	0.003317	0.0198677	0.00310732	0.0208714	0.00326294	0.021876	0.00341858	0.0228817	0.00357425	0.0207576	0.00324132	0.0209135	0.00326067	0.0207576	0.00324608			0.0249452	0.00359501	0.0251791	0.0034162	0.022615	0.0033984	0.0214322	0.00340686	0.023136	0.00355383	0.021932	0.00335445	0.0240903	0.00352989	0.0226108	0.00348473	0.0231993	0.00344674	0.0221321	0.00347454	0.0257124	0.00350102	0.0217934	0.00343172	0.0211025	0.00358455	0.0218025	0.00339392
		0.021	0.00345	0.0198687	0.00310617	0.0208724	0.00326173	0.0218771	0.00341732	0.0228828	0.00357293	0.0209135	0.00326546	0.0210694	0.00328477	0.0209135	0.00327025			0.024365	0.0035943	0.0246458	0.00342443	0.0221543	0.00339663	0.0209032	0.00340529	0.02259	0.00355049	0.021403	0.0033522	0.0237545	0.00353629	0.0221671	0.00348318	0.0227548	0.00345489	0.0216031	0.00347258	0.0253272	0.00350721	0.021418	0.00342941	0.020693	0.00358388	0.0216025	0.00339101
		IsoLine	IsoLine	0.0198716	0.00310511	0.0208755	0.00326062	0.0218803	0.00341616	0.0228862	0.00357171	0.0210694	0.0032896	0.0212254	0.00330887	0.0210694	0.00329442			0.0237933	0.00359137	0.0240874	0.00343126	0.0217003	0.0033926	0.0203819	0.00340089	0.0220519	0.00354461	0.0208818	0.00334737	0.0234029	0.00354144	0.02173	0.00347966	0.0222895	0.00346163	0.0210818	0.00346804	0.0249239	0.00351215	0.0210481	0.00342492	0.0202894	0.00358061	0.0214166	0.00338698
				0.0198762	0.00310424	0.0208803	0.0032597	0.0218854	0.00341519	0.0228915	0.0035707	0.0212254	0.00331373	0.0213814	0.00333297	0.0212254	0.00331859			0.0232412	0.00358628	0.0235086	0.00343663	0.0212618	0.0033864	0.0198785	0.00339375	0.0215323	0.00353631	0.0203784	0.00334006	0.0230384	0.00354529	0.0213078	0.00347425	0.0218071	0.00346691	0.0205784	0.00346101	0.0245059	0.0035158	0.0206909	0.00341832	0.0198997	0.00357479	0.0212497	0.00338195
				0.0198821	0.00310361	0.0208865	0.00325904	0.0218919	0.0034145	0.0228983	0.00356998	0.0213814	0.00333787	0.0215374	0.00335708	0.0213814	0.00334277			0.0227194	0.00357912	0.0229144	0.0034405	0.0208475	0.00337815	0.0194028	0.003384	0.0210412	0.00352574	0.0199026	0.00333041	0.0226643	0.00354782	0.0209088	0.00346703	0.0213119	0.00347068	0.0201027	0.00345162	0.0240767	0.00351811	0.0203533	0.00340975	0.0195313	0.00356655	0.0211065	0.00337605
				0.0198888	0.00310328	0.0208935	0.0032587	0.0218993	0.00341414	0.022906	0.00356961	0.0215374	0.00336201	0.0216934	0.00338118	0.0215374	0.00336694			0.0222381	0.00357002	0.0223098	0.00344282	0.0204653	0.00336801	0.018964	0.00337184	0.0205883	0.00351312	0.0194639	0.00331861	0.0222836	0.00354901	0.0205407	0.00345816	0.0208081	0.00347291	0.0196639	0.00344006	0.02364	0.00351907	0.0200419	0.00339937	0.0191916	0.00355604	0.0209909	0.00336944
				0.0198958	0.00310328	0.0209009	0.0032587	0.021907	0.00341414	0.0229141	0.00356961	0.0216934	0.00338615	0.0218495	0.00340528	0.0216934	0.00339111			0.0218067	0.00355918	0.0217	0.00344358	0.0201228	0.00335618	0.0185707	0.00335751	0.0201823	0.00349868	0.0190705	0.0033049	0.0218996	0.00354884	0.0202108	0.00344781	0.0203	0.00347358	0.0192706	0.00342655	0.0231996	0.00351868	0.0197628	0.0033874	0.0188871	0.00354346	0.020906	0.00336231
				0.0199025	0.00310361	0.0209079	0.00325904	0.0219144	0.0034145	0.0229218	0.00356998	0.0218495	0.00341029	0.0220056	0.00342939	0.0218495	0.00341529			0.0214335	0.00354679	0.0210902	0.00344278	0.0198265	0.00334288	0.0182304	0.00334127	0.0198312	0.00348271	0.0187303	0.00328953	0.0215157	0.00354731	0.0199255	0.00343618	0.0197918	0.00347268	0.0189304	0.00341136	0.0227592	0.00351693	0.0195214	0.00337405	0.0186237	0.00352907	0.0208541	0.00335485
				0.0199084	0.00310424	0.0209141	0.0032597	0.0219209	0.00341519	0.0229286	0.0035707	0.0220056	0.00343443	0.0221617	0.00345349	0.0220056	0.00343946			0.0211259	0.0035331	0.0204856	0.00344041	0.0195822	0.00332838	0.01795	0.00332346	0.0195417	0.00346552	0.0184499	0.00327281	0.021135	0.00354444	0.0196903	0.00342349	0.019288	0.00347022	0.0186499	0.00339478	0.0223226	0.00351385	0.0193224	0.00335959	0.0184065	0.00351313	0.0208366	0.00334726
				0.0199129	0.00310511	0.0209189	0.00326062	0.0219259	0.00341616	0.0229339	0.00357171	0.0221617	0.00345857	0.0223178	0.0034776	0.0221617	0.00346364			0.0208898	0.00351838	0.0198914	0.00343651	0.0193947	0.00331295	0.0177347	0.00330441	0.0193196	0.00344745	0.0182347	0.00325506	0.0207609	0.00354025	0.0195097	0.00341	0.0187928	0.00346623	0.0184347	0.00337713	0.0218934	0.00350945	0.0191697	0.0033443	0.0182398	0.00349597	0.0208541	0.00333974
				0.0199159	0.00310617	0.020922	0.00326173	0.0219291	0.00341732	0.0229373	0.00357293	0.0223178	0.00348271	0.022474	0.0035017	0.0223178	0.00348782			0.0207298	0.00350292	0.0193126	0.00343111	0.0192677	0.00329691	0.0175889	0.00328449	0.0191691	0.00342884	0.0180888	0.00323663	0.0203965	0.00353478	0.0193874	0.00339596	0.0183104	0.00346073	0.0182888	0.00335876	0.0214754	0.00350378	0.0190662	0.00332848	0.0181269	0.00347791	0.020906	0.00333251
				0.0199169	0.00310732	0.020923	0.00326294	0.0219302	0.00341858	0.0229384	0.00357425	0.022474	0.00350685	0.0226302	0.00352581	0.022474	0.00351199			0.020649	0.003487	0.0187541	0.00342424	0.0192036	0.00328055	0.0175152	0.0032641	0.0190931	0.00341006	0.0180152	0.00321788	0.0200449	0.00352808	0.0193257	0.00338165	0.0178451	0.00345378	0.0182152	0.00334002	0.0210721	0.00349688	0.019014	0.00331244	0.0180699	0.00345931	0.020991	0.00332576
				ConcTikEll	ConcTikEll	ConcTikEll	ConcTikEll	ConcTikEll	ConcTikEll	ConcTikEll	ConcTikEll	0.0226302	0.00353099	0.0227864	0.00354992	0.0226302	0.00353617			0.020649	0.00347095	0.0182208	0.00341597	0.0192036	0.0032642	0.0175153	0.00324363	0.0190932	0.00339147	0.0180153	0.00319916	0.0197091	0.0035202	0.0193257	0.00336734	0.0174007	0.00344542	0.0182153	0.00332129	0.020687	0.00348881	0.0190141	0.00329648	0.0180699	0.00344053	0.0211067	0.00331968
												0.0227864	0.00355513	0.0229426	0.00357402	0.0227864	0.00356035			0.0207298	0.00345508	0.0177172	0.00340637	0.0192678	0.00324818	0.017589	0.00322348	0.0191693	0.00337344	0.018089	0.00318086	0.0193921	0.00351121	0.0193875	0.00335333	0.016981	0.00343575	0.018289	0.00330291	0.0203233	0.00347964	0.0190664	0.00328093	0.0181269	0.00342193	0.0212499	0.00331443
												0.0229426	0.00357928	0.0230988	0.00359813	0.0229426	0.00358453			0.0208898	0.00343969	0.0172476	0.00339552	0.0193949	0.0032328	0.0177349	0.00320403	0.01932	0.00335631	0.0182349	0.00316331	0.0190964	0.00350118	0.0195099	0.00333987	0.0165896	0.00342483	0.0184349	0.00328526	0.0199841	0.00346946	0.01917	0.00326608	0.0182398	0.00340388	0.0214168	0.00331015
												0.0230988	0.00360342	0.0232551	0.00362224	0.0230988	0.00360871			0.0211259	0.00342509	0.0168159	0.00338352	0.0195825	0.00321836	0.0179502	0.00318568	0.0195423	0.00334042	0.0184503	0.00314687	0.0188246	0.0034902	0.0196905	0.00332722	0.0162299	0.00341275	0.0186502	0.00326868	0.0196724	0.00345834	0.0193229	0.00325221	0.0184065	0.00338673	0.0216027	0.00330696
												0.0232551	0.00362756	0.0234114	0.00364635	0.0232551	0.00363289			0.0214336	0.00341155	0.016426	0.00337046	0.0198268	0.00320513	0.0182307	0.00316877	0.019832	0.00332608	0.0187308	0.00313185	0.0185791	0.00347837	0.0199258	0.00331565	0.015905	0.00339964	0.0189308	0.00325348	0.0193907	0.00344638	0.019522	0.00323961	0.0186237	0.00337081	0.0218027	0.00330495
												0.0234114	0.00365171	0.0235677	0.00367046	0.0234114	0.00365707			0.0218067	0.00339935	0.016081	0.00335646	0.0201232	0.00319339	0.018571	0.00315364	0.0201832	0.00331357	0.0190711	0.00311855	0.0183619	0.00346579	0.0202112	0.00330537	0.0156175	0.00338558	0.019271	0.00323997	0.0191416	0.00343368	0.0197635	0.00322852	0.0188871	0.00335642	0.0220113	0.00330417
												0.0235677	0.00367585	0.0237241	0.00369457	0.0235677	0.00368125			0.0222382	0.00338872	0.0157839	0.00334163	0.0204658	0.00318334	0.0189644	0.00314058	0.0205893	0.00330313	0.0194645	0.00310722	0.0181749	0.00345256	0.0205411	0.00329657	0.0153699	0.00337071	0.0196644	0.0032284	0.0189271	0.00342035	0.0200427	0.00321915	0.0191916	0.00334386	0.0222228	0.00330465
												0.0237241	0.0037	0.0237593	0.0037	0.023689	0.0037			0.0227194	0.00337986	0.0155374	0.00332611	0.020848	0.0031752	0.0194032	0.00312985	0.0210424	0.00329497	0.0199033	0.00309808	0.0180197	0.00343879	0.0209092	0.00328945	0.0151645	0.00335515	0.0201033	0.00321901	0.0187491	0.00340651	0.0203542	0.00321168	0.0195314	0.00333337	0.0224313	0.00330637
												0.0237241	0.0037	ConcBand	ConcBand	ConcBand	ConcBand			0.0232412	0.00337295	0.0153434	0.00331003	0.0212624	0.00316912	0.019879	0.00312164	0.0215335	0.00328924	0.0203791	0.00309132	0.0178976	0.00342461	0.0213082	0.00328412	0.0150028	0.00333904	0.020579	0.00321197	0.018609	0.00339228	0.0206919	0.00320626	0.0198997	0.00332515	0.0226313	0.00330928
												IsoLine	IsoLine							0.0237933	0.00336813	0.0152036	0.00329352	0.0217009	0.00316522	0.0203824	0.00311613	0.0220532	0.00328605	0.0208825	0.00308707	0.0178096	0.00341013	0.0217304	0.0032807	0.0148863	0.00332251	0.0210825	0.00320742	0.0185081	0.00337776	0.0210491	0.003203	0.0202894	0.00331935	0.0228173	0.00331331
																				0.0243651	0.00336548	0.0151193	0.00327672	0.0221549	0.00316356	0.0209037	0.00311342	0.0225913	0.00328548	0.0214038	0.0030854	0.0177565	0.00339549	0.0221676	0.00327925	0.0148161	0.0033057	0.0216037	0.00320546	0.0184472	0.0033631	0.0214191	0.00320196	0.020693	0.0033161	0.0229841	0.00331834
																				0.0249453	0.00336507	0.0150911	0.00325978	0.0226156	0.0031642	0.0214326	0.00311357	0.0231373	0.00328752	0.0219328	0.00308635	0.0177388	0.00338079	0.0226113	0.0032798	0.0147926	0.00328876	0.0221327	0.00320611	0.0184269	0.00334841	0.0217945	0.00320315	0.0211025	0.00331546	0.0231273	0.00332424
																				0.0255226	0.00336689	0.0151193	0.00324284	0.0230741	0.00316711	0.0219591	0.00311656	0.0236807	0.00329214	0.0224592	0.0030899	0.0177566	0.00336618	0.0230528	0.00328233	0.0148161	0.00327182	0.0226591	0.00320937	0.0184473	0.00333382	0.0221681	0.00320656	0.0215101	0.00331743	0.023243	0.00333085
																				0.0260859	0.00337091	0.0152036	0.00322605	0.0235214	0.00317223	0.0224726	0.00312235	0.0242109	0.00329924	0.0229728	0.00309599	0.0178097	0.00335176	0.0234835	0.00328681	0.0148864	0.00325504	0.0231727	0.00321517	0.0185082	0.00331945	0.0225325	0.00321213	0.0219077	0.00332199	0.0233279	0.00333798
																				0.0266242	0.00337705	0.0153434	0.00320955	0.0239489	0.00317947	0.0229634	0.00313081	0.0247174	0.0033087	0.0234635	0.00310449	0.0178978	0.00333768	0.0238951	0.00329314	0.0150028	0.00323856	0.0236635	0.0032234	0.0186092	0.00330543	0.0228808	0.00321973	0.0222876	0.00332903	0.0233798	0.00334544
																				0.0271269	0.0033852	0.0155374	0.00319348	0.0243481	0.00318869	0.0234218	0.00314179	0.0251906	0.00332032	0.0239219	0.00311523	0.01802	0.00332403	0.0242796	0.0033012	0.0151645	0.00322252	0.0241219	0.0032339	0.0187494	0.00329187	0.0232061	0.00322922	0.0226425	0.00333843	0.0233972	0.00335303
																				0.0275844	0.00339519	0.0157839	0.00317798	0.0247113	0.00319971	0.0238389	0.00315507	0.0256211	0.00333389	0.024339	0.00312802	0.0181752	0.00331096	0.0246294	0.00331084	0.01537	0.00320706	0.0245389	0.00324646	0.0189275	0.00327889	0.023502	0.00324043	0.0229654	0.00335001
																				0.0279877	0.00340684	0.016081	0.00316317	0.0250316	0.0032123	0.0242065	0.00317039	0.0260006	0.00334913	0.0247066	0.0031426	0.0183623	0.00329855	0.0249378	0.00332186	0.0156175	0.0031923	0.0249066	0.00326085	0.019142	0.00326661	0.0237629	0.00325312	0.0232501	0.00336352
																				0.0283289	0.00341991	0.016426	0.00314919	0.0253025	0.00322624	0.0245176	0.00318746	0.0263216	0.00336575	0.0250177	0.00315868	0.0185795	0.00328693	0.0251987	0.00333405	0.015905	0.00317838	0.0252177	0.00327678	0.0193912	0.00325512	0.0239837	0.00326706	0.023491	0.00337873
																				0.0286014	0.00343414	0.016816	0.00313616	0.0255189	0.00324124	0.0247661	0.00320594	0.0265781	0.00338342	0.0252662	0.00317596	0.0188251	0.00327619	0.0254071	0.00334717	0.01623	0.00316541	0.0254661	0.00329393	0.0196729	0.00324453	0.02416	0.00328197	0.0236834	0.00339531
																				0.0288	0.00344927	0.0172476	0.00312418	0.0256765	0.00325701	0.0249471	0.00322547	0.0267649	0.00340181	0.0254471	0.00319409	0.0190969	0.00326641	0.0255589	0.00336097	0.0165897	0.0031535	0.0256471	0.00331199	0.0199847	0.00323492	0.0242884	0.00329756	0.0238235	0.00341297
																				0.0289207	0.003465	0.0177172	0.00311337	0.0257723	0.00327325	0.0250571	0.00324567	0.0268784	0.00342055	0.0255571	0.00321273	0.0193926	0.0032577	0.0256511	0.00337518	0.0169811	0.00314275	0.0257571	0.00333059	0.0203239	0.00322638	0.0243664	0.00331353	0.0239087	0.00343134
																				0.0289612	0.00348102	0.0182209	0.0031038	0.0258045	0.00328964	0.025094	0.00326615	0.0269164	0.00343928	0.025594	0.00323151	0.0197097	0.00325011	0.0256821	0.00338952	0.0174007	0.00313326	0.025794	0.00334937	0.0206876	0.00321898	0.0243925	0.00332957	0.0239373	0.00345008
																						0.0187542	0.00309557									0.0200455	0.00324371			0.0178452	0.00312511			0.0210728	0.00321279
																						0.0193126	0.00308874									0.0203971	0.00323856			0.0183105	0.00311837			0.0214761	0.00320785
																						0.0198914	0.00308337									0.0207616	0.00323471			0.0187929	0.00311309			0.0218941	0.0032042
																						0.0204856	0.0030795									0.0211357	0.00323218			0.0192881	0.00310932			0.0223233	0.00320189
																						0.0210902	0.00307718									0.0215164	0.00323099			0.0197919	0.00310709			0.02276	0.00320093
																						0.0217	0.00307642									0.0219004	0.00323116			0.0203	0.00310642			0.0232004	0.00320132
																						0.0223098	0.00307722									0.0222843	0.00323269			0.0208082	0.00310732			0.0236408	0.00320307
																						0.0229144	0.00307959									0.022665	0.00323556			0.021312	0.00310978			0.0240774	0.00320615
																						0.0235086	0.00308349									0.0230391	0.00323975			0.0218072	0.00311377			0.0245066	0.00321055
																						0.0240874	0.00308889									0.0234035	0.00324522			0.0222896	0.00311927			0.0249246	0.00321622
																						0.0246459	0.00309576									0.0237551	0.00325192			0.0227549	0.00312622			0.0253279	0.00322312
																						0.0251792	0.00310403									0.0240909	0.0032598			0.0231993	0.00313458			0.025713	0.00323119
																						0.0256828	0.00311363									0.0244079	0.00326879			0.023619	0.00314425			0.0260767	0.00324036
																						0.0261524	0.00312448									0.0247036	0.00327882			0.0240104	0.00315517			0.0264159	0.00325054
																						0.0265841	0.00313648									0.0249754	0.0032898			0.0243701	0.00316725			0.0267276	0.00326166
																						0.026974	0.00314954									0.0252209	0.00330163			0.024695	0.00318036			0.0270093	0.00327362
																						0.027319	0.00316354									0.0254381	0.00331421			0.0249825	0.00319442			0.0272584	0.00328632
																						0.0276161	0.00317837									0.0256251	0.00332744			0.0252301	0.00320929			0.0274729	0.00329965
																						0.0278626	0.00319389									0.0257803	0.00334121			0.0254355	0.00322485			0.0276509	0.00331349
																						0.0280566	0.00320997									0.0259024	0.00335539			0.0255972	0.00324096			0.027791	0.00332772
																						0.0281964	0.00322648									0.0259904	0.00336987			0.0257137	0.00325749			0.0278919	0.00334224
																						0.0282807	0.00324328									0.0260435	0.00338451			0.0257839	0.0032743			0.0279528	0.0033569
																						0.0283089	0.00326022									0.0260612	0.00339921			0.0258074	0.00329124			0.0279731	0.00337159

## Sheet: PlotDat11
		0.0248	0.00348	0.0199169	0.00310732	0.020923	0.00326294	0.0219302	0.00341858	0.0229384	0.00357425	0.0191997	0.003	0.0192282	0.003	0.0191714	0.003	0.0188883	0.00295172	0.0289612	0.00348102	0.0283089	0.00326022	0.0258045	0.00328964	0.025094	0.00326615	0.0269164	0.00343928	0.025594	0.00323151	0.0260612	0.00339921	0.0256821	0.00338952	0.0258074	0.00329124	0.025794	0.00334937	0.0279731	0.00337159	0.0243925	0.00332957	0.0239373	0.00345008	0.0233972	0.00335303
		0.0217	0.00326	0.0199159	0.00310847	0.020922	0.00326414	0.0219291	0.00341984	0.0229373	0.00357557	0.0191997	0.003	0.0193554	0.00301969	0.0191997	0.0030044	0.0198923	0.00310732	0.0289207	0.00349702	0.0282807	0.00327716	0.0257723	0.00330587	0.0250571	0.00328651	0.0268782	0.00345764	0.025557	0.00325006	0.0260434	0.00341382	0.0256511	0.00340372	0.0257839	0.00330818	0.025757	0.00336797	0.0279527	0.00338618	0.0243662	0.00334536	0.0239087	0.00346881	0.0233797	0.00336055
		0.0225	0.003281	0.0199129	0.00310952	0.0209189	0.00326525	0.0219259	0.003421	0.0229339	0.00357678	0.0193554	0.00302413	0.0195111	0.00304379	0.0193554	0.00302857	0.0208972	0.00326294	0.0288	0.00351269	0.0281964	0.00329395	0.0256764	0.00332161	0.024947	0.00330636	0.0267645	0.00347526	0.0254469	0.00326803	0.0259903	0.00342824	0.0255587	0.00341749	0.0257136	0.00332496	0.0256469	0.00338602	0.0278918	0.00340055	0.0242881	0.0033606	0.0238235	0.00348718	0.0233278	0.00336778
		0.0213	0.00326	0.0199084	0.0031104	0.0209141	0.00326617	0.0219209	0.00342197	0.0229286	0.00357779	0.0195111	0.00304826	0.0196668	0.00306788	0.0195111	0.00305273	0.0219031	0.00341858	0.0286014	0.00352773	0.0280566	0.00331045	0.0255186	0.00333656	0.0247659	0.0033253	0.0265775	0.00349181	0.0252658	0.00328507	0.0259022	0.00344232	0.0254069	0.00343057	0.0255972	0.00334144	0.0254659	0.00340318	0.0277908	0.00341457	0.0241595	0.003375	0.0236834	0.00350483	0.0232429	0.00337453
		0.023	0.00342	0.0199025	0.00311102	0.0209079	0.00326683	0.0219144	0.00342266	0.0229218	0.00357851	0.0196668	0.00307239	0.0198226	0.00309198	0.0196668	0.0030769	0.02291	0.00357425	0.0283289	0.00354183	0.0278626	0.00332652	0.0253022	0.00335042	0.0245174	0.00334297	0.0263209	0.00350696	0.0250173	0.00330084	0.02578	0.00345597	0.0251984	0.00344271	0.0254355	0.00335748	0.0252173	0.00341911	0.0276506	0.00342813	0.0239831	0.00338826	0.023491	0.00352141	0.0231272	0.00338061
		0.0218	0.00322	0.0198958	0.00311135	0.0209009	0.00326717	0.021907	0.00342302	0.0229141	0.00357889	0.0198226	0.00309652	0.0199784	0.00311608	0.0198226	0.00310106	IsoLine	IsoLine	0.0279876	0.00355473	0.0276161	0.00334202	0.0250312	0.00336294	0.0242062	0.00335903	0.0259997	0.00352042	0.0247061	0.00331503	0.0256248	0.00346904	0.0249375	0.00345367	0.02523	0.00337294	0.0249062	0.0034335	0.0274725	0.00344111	0.0237622	0.00340014	0.0232501	0.0035366	0.022984	0.00338586
		0.0219	0.00339	0.0198888	0.00311135	0.0208935	0.00326717	0.0218993	0.00342302	0.022906	0.00357889	0.0199784	0.00312065	0.0201342	0.00314017	0.0199784	0.00312523			0.0275843	0.00356618	0.027319	0.00335683	0.0247109	0.00337386	0.0238385	0.00337316	0.0256201	0.00353192	0.0243384	0.00332738	0.0254377	0.00348145	0.024629	0.00346323	0.0249825	0.0033877	0.0245384	0.00344607	0.027258	0.00345339	0.0235013	0.00341039	0.0229654	0.0035501	0.0228171	0.00339014
		0.0225	0.003382	0.0198821	0.00311102	0.0208865	0.00326683	0.0218919	0.00342266	0.0228983	0.00357851	0.0201342	0.00314479	0.02029	0.00316427	0.0201342	0.0031494			0.0271269	0.00357594	0.026974	0.00337081	0.0243476	0.00338297	0.0234214	0.00338509	0.0251895	0.00354124	0.0239212	0.00333764	0.0252205	0.00349307	0.0242792	0.00347121	0.024695	0.00340162	0.0241213	0.00345658	0.0270088	0.00346488	0.0232052	0.00341883	0.0226425	0.00356165	0.0226311	0.00339333
		0.0203	0.00329	0.0198762	0.0031104	0.0208803	0.00326617	0.0218854	0.00342197	0.0228915	0.00357779	0.02029	0.00316892	0.0204458	0.00318837	0.02029	0.00317357			0.0266241	0.00358385	0.026584	0.00338384	0.0239483	0.0033901	0.022963	0.00339458	0.0247162	0.00354821	0.0234628	0.0033456	0.0249749	0.00350381	0.0238947	0.00347745	0.02437	0.00341459	0.0236629	0.00346481	0.0267271	0.00347547	0.0228798	0.00342529	0.0222876	0.00357104	0.0224311	0.00339534
		0.022	0.00334	0.0198716	0.00310952	0.0208755	0.00326525	0.0218803	0.003421	0.0228862	0.00357678	0.0204458	0.00319305	0.0206017	0.00321247	0.0204458	0.00319774			0.0260858	0.00358973	0.0261524	0.00339582	0.0235208	0.00339511	0.0224722	0.00340145	0.0242096	0.00355268	0.022972	0.00335112	0.0247031	0.00351359	0.0234831	0.00348184	0.0240103	0.0034265	0.0231721	0.00347062	0.0264153	0.00348508	0.0225315	0.00342964	0.0219077	0.00357806	0.0222225	0.00339612
		0.0232	0.00336	0.0198687	0.00310847	0.0208724	0.00326414	0.0218771	0.00341984	0.0228828	0.00357557	0.0206017	0.00321719	0.0207576	0.00323657	0.0206017	0.00322191			0.0255226	0.00359347	0.0256828	0.00340663	0.0230735	0.00339789	0.0219586	0.00340557	0.0236794	0.00355456	0.0224584	0.00335409	0.0244074	0.0035223	0.0230523	0.00348428	0.0236189	0.00343725	0.0226585	0.00347389	0.0260761	0.00349362	0.022167	0.0034318	0.0215101	0.00358259	0.0220111	0.00339564
		0.0217	0.003317	0.0198677	0.00310732	0.0208714	0.00326294	0.021876	0.00341858	0.0228817	0.00357425	0.0207576	0.00324132	0.0209135	0.00326067	0.0207576	0.00324608			0.0249452	0.00359501	0.0251791	0.0034162	0.022615	0.0033984	0.0214322	0.00340686	0.023136	0.00355383	0.021932	0.00335445	0.0240903	0.00352989	0.0226108	0.00348473	0.0231993	0.00344674	0.0221321	0.00347454	0.0257124	0.00350102	0.0217934	0.00343172	0.0211025	0.00358455	0.0218025	0.00339392
		0.021	0.00345	0.0198687	0.00310617	0.0208724	0.00326173	0.0218771	0.00341732	0.0228828	0.00357293	0.0209135	0.00326546	0.0210694	0.00328477	0.0209135	0.00327025			0.024365	0.0035943	0.0246458	0.00342443	0.0221543	0.00339663	0.0209032	0.00340529	0.02259	0.00355049	0.021403	0.0033522	0.0237545	0.00353629	0.0221671	0.00348318	0.0227548	0.00345489	0.0216031	0.00347258	0.0253272	0.00350721	0.021418	0.00342941	0.020693	0.00358388	0.0216025	0.00339101
		IsoLine	IsoLine	0.0198716	0.00310511	0.0208755	0.00326062	0.0218803	0.00341616	0.0228862	0.00357171	0.0210694	0.0032896	0.0212254	0.00330887	0.0210694	0.00329442			0.0237933	0.00359137	0.0240874	0.00343126	0.0217003	0.0033926	0.0203819	0.00340089	0.0220519	0.00354461	0.0208818	0.00334737	0.0234029	0.00354144	0.02173	0.00347966	0.0222895	0.00346163	0.0210818	0.00346804	0.0249239	0.00351215	0.0210481	0.00342492	0.0202894	0.00358061	0.0214166	0.00338698
				0.0198762	0.00310424	0.0208803	0.0032597	0.0218854	0.00341519	0.0228915	0.0035707	0.0212254	0.00331373	0.0213814	0.00333297	0.0212254	0.00331859			0.0232412	0.00358628	0.0235086	0.00343663	0.0212618	0.0033864	0.0198785	0.00339375	0.0215323	0.00353631	0.0203784	0.00334006	0.0230384	0.00354529	0.0213078	0.00347425	0.0218071	0.00346691	0.0205784	0.00346101	0.0245059	0.0035158	0.0206909	0.00341832	0.0198997	0.00357479	0.0212497	0.00338195
				0.0198821	0.00310361	0.0208865	0.00325904	0.0218919	0.0034145	0.0228983	0.00356998	0.0213814	0.00333787	0.0215374	0.00335708	0.0213814	0.00334277			0.0227194	0.00357912	0.0229144	0.0034405	0.0208475	0.00337815	0.0194028	0.003384	0.0210412	0.00352574	0.0199026	0.00333041	0.0226643	0.00354782	0.0209088	0.00346703	0.0213119	0.00347068	0.0201027	0.00345162	0.0240767	0.00351811	0.0203533	0.00340975	0.0195313	0.00356655	0.0211065	0.00337605
				0.0198888	0.00310328	0.0208935	0.0032587	0.0218993	0.00341414	0.022906	0.00356961	0.0215374	0.00336201	0.0216934	0.00338118	0.0215374	0.00336694			0.0222381	0.00357002	0.0223098	0.00344282	0.0204653	0.00336801	0.018964	0.00337184	0.0205883	0.00351312	0.0194639	0.00331861	0.0222836	0.00354901	0.0205407	0.00345816	0.0208081	0.00347291	0.0196639	0.00344006	0.02364	0.00351907	0.0200419	0.00339937	0.0191916	0.00355604	0.0209909	0.00336944
				0.0198958	0.00310328	0.0209009	0.0032587	0.021907	0.00341414	0.0229141	0.00356961	0.0216934	0.00338615	0.0218495	0.00340528	0.0216934	0.00339111			0.0218067	0.00355918	0.0217	0.00344358	0.0201228	0.00335618	0.0185707	0.00335751	0.0201823	0.00349868	0.0190705	0.0033049	0.0218996	0.00354884	0.0202108	0.00344781	0.0203	0.00347358	0.0192706	0.00342655	0.0231996	0.00351868	0.0197628	0.0033874	0.0188871	0.00354346	0.020906	0.00336231
				0.0199025	0.00310361	0.0209079	0.00325904	0.0219144	0.0034145	0.0229218	0.00356998	0.0218495	0.00341029	0.0220056	0.00342939	0.0218495	0.00341529			0.0214335	0.00354679	0.0210902	0.00344278	0.0198265	0.00334288	0.0182304	0.00334127	0.0198312	0.00348271	0.0187303	0.00328953	0.0215157	0.00354731	0.0199255	0.00343618	0.0197918	0.00347268	0.0189304	0.00341136	0.0227592	0.00351693	0.0195214	0.00337405	0.0186237	0.00352907	0.0208541	0.00335485
				0.0199084	0.00310424	0.0209141	0.0032597	0.0219209	0.00341519	0.0229286	0.0035707	0.0220056	0.00343443	0.0221617	0.00345349	0.0220056	0.00343946			0.0211259	0.0035331	0.0204856	0.00344041	0.0195822	0.00332838	0.01795	0.00332346	0.0195417	0.00346552	0.0184499	0.00327281	0.021135	0.00354444	0.0196903	0.00342349	0.019288	0.00347022	0.0186499	0.00339478	0.0223226	0.00351385	0.0193224	0.00335959	0.0184065	0.00351313	0.0208366	0.00334726
				0.0199129	0.00310511	0.0209189	0.00326062	0.0219259	0.00341616	0.0229339	0.00357171	0.0221617	0.00345857	0.0223178	0.0034776	0.0221617	0.00346364			0.0208898	0.00351838	0.0198914	0.00343651	0.0193947	0.00331295	0.0177347	0.00330441	0.0193196	0.00344745	0.0182347	0.00325506	0.0207609	0.00354025	0.0195097	0.00341	0.0187928	0.00346623	0.0184347	0.00337713	0.0218934	0.00350945	0.0191697	0.0033443	0.0182398	0.00349597	0.0208541	0.00333974
				0.0199159	0.00310617	0.020922	0.00326173	0.0219291	0.00341732	0.0229373	0.00357293	0.0223178	0.00348271	0.022474	0.0035017	0.0223178	0.00348782			0.0207298	0.00350292	0.0193126	0.00343111	0.0192677	0.00329691	0.0175889	0.00328449	0.0191691	0.00342884	0.0180888	0.00323663	0.0203965	0.00353478	0.0193874	0.00339596	0.0183104	0.00346073	0.0182888	0.00335876	0.0214754	0.00350378	0.0190662	0.00332848	0.0181269	0.00347791	0.020906	0.00333251
				0.0199169	0.00310732	0.020923	0.00326294	0.0219302	0.00341858	0.0229384	0.00357425	0.022474	0.00350685	0.0226302	0.00352581	0.022474	0.00351199			0.020649	0.003487	0.0187541	0.00342424	0.0192036	0.00328055	0.0175152	0.0032641	0.0190931	0.00341006	0.0180152	0.00321788	0.0200449	0.00352808	0.0193257	0.00338165	0.0178451	0.00345378	0.0182152	0.00334002	0.0210721	0.00349688	0.019014	0.00331244	0.0180699	0.00345931	0.020991	0.00332576
				ConcTikEll	ConcTikEll	ConcTikEll	ConcTikEll	ConcTikEll	ConcTikEll	ConcTikEll	ConcTikEll	0.0226302	0.00353099	0.0227864	0.00354992	0.0226302	0.00353617			0.020649	0.00347095	0.0182208	0.00341597	0.0192036	0.0032642	0.0175153	0.00324363	0.0190932	0.00339147	0.0180153	0.00319916	0.0197091	0.0035202	0.0193257	0.00336734	0.0174007	0.00344542	0.0182153	0.00332129	0.020687	0.00348881	0.0190141	0.00329648	0.0180699	0.00344053	0.0211067	0.00331968
												0.0227864	0.00355513	0.0229426	0.00357402	0.0227864	0.00356035			0.0207298	0.00345508	0.0177172	0.00340637	0.0192678	0.00324818	0.017589	0.00322348	0.0191693	0.00337344	0.018089	0.00318086	0.0193921	0.00351121	0.0193875	0.00335333	0.016981	0.00343575	0.018289	0.00330291	0.0203233	0.00347964	0.0190664	0.00328093	0.0181269	0.00342193	0.0212499	0.00331443
												0.0229426	0.00357928	0.0230988	0.00359813	0.0229426	0.00358453			0.0208898	0.00343969	0.0172476	0.00339552	0.0193949	0.0032328	0.0177349	0.00320403	0.01932	0.00335631	0.0182349	0.00316331	0.0190964	0.00350118	0.0195099	0.00333987	0.0165896	0.00342483	0.0184349	0.00328526	0.0199841	0.00346946	0.01917	0.00326608	0.0182398	0.00340388	0.0214168	0.00331015
												0.0230988	0.00360342	0.0232551	0.00362224	0.0230988	0.00360871			0.0211259	0.00342509	0.0168159	0.00338352	0.0195825	0.00321836	0.0179502	0.00318568	0.0195423	0.00334042	0.0184503	0.00314687	0.0188246	0.0034902	0.0196905	0.00332722	0.0162299	0.00341275	0.0186502	0.00326868	0.0196724	0.00345834	0.0193229	0.00325221	0.0184065	0.00338673	0.0216027	0.00330696
												0.0232551	0.00362756	0.0234114	0.00364635	0.0232551	0.00363289			0.0214336	0.00341155	0.016426	0.00337046	0.0198268	0.00320513	0.0182307	0.00316877	0.019832	0.00332608	0.0187308	0.00313185	0.0185791	0.00347837	0.0199258	0.00331565	0.015905	0.00339964	0.0189308	0.00325348	0.0193907	0.00344638	0.019522	0.00323961	0.0186237	0.00337081	0.0218027	0.00330495
												0.0234114	0.00365171	0.0235677	0.00367046	0.0234114	0.00365707			0.0218067	0.00339935	0.016081	0.00335646	0.0201232	0.00319339	0.018571	0.00315364	0.0201832	0.00331357	0.0190711	0.00311855	0.0183619	0.00346579	0.0202112	0.00330537	0.0156175	0.00338558	0.019271	0.00323997	0.0191416	0.00343368	0.0197635	0.00322852	0.0188871	0.00335642	0.0220113	0.00330417
												0.0235677	0.00367585	0.0237241	0.00369457	0.0235677	0.00368125			0.0222382	0.00338872	0.0157839	0.00334163	0.0204658	0.00318334	0.0189644	0.00314058	0.0205893	0.00330313	0.0194645	0.00310722	0.0181749	0.00345256	0.0205411	0.00329657	0.0153699	0.00337071	0.0196644	0.0032284	0.0189271	0.00342035	0.0200427	0.00321915	0.0191916	0.00334386	0.0222228	0.00330465
												0.0237241	0.0037	0.0237593	0.0037	0.023689	0.0037			0.0227194	0.00337986	0.0155374	0.00332611	0.020848	0.0031752	0.0194032	0.00312985	0.0210424	0.00329497	0.0199033	0.00309808	0.0180197	0.00343879	0.0209092	0.00328945	0.0151645	0.00335515	0.0201033	0.00321901	0.0187491	0.00340651	0.0203542	0.00321168	0.0195314	0.00333337	0.0224313	0.00330637
												0.0237241	0.0037	ConcBand	ConcBand	ConcBand	ConcBand			0.0232412	0.00337295	0.0153434	0.00331003	0.0212624	0.00316912	0.019879	0.00312164	0.0215335	0.00328924	0.0203791	0.00309132	0.0178976	0.00342461	0.0213082	0.00328412	0.0150028	0.00333904	0.020579	0.00321197	0.018609	0.00339228	0.0206919	0.00320626	0.0198997	0.00332515	0.0226313	0.00330928
												IsoLine	IsoLine							0.0237933	0.00336813	0.0152036	0.00329352	0.0217009	0.00316522	0.0203824	0.00311613	0.0220532	0.00328605	0.0208825	0.00308707	0.0178096	0.00341013	0.0217304	0.0032807	0.0148863	0.00332251	0.0210825	0.00320742	0.0185081	0.00337776	0.0210491	0.003203	0.0202894	0.00331935	0.0228173	0.00331331
																				0.0243651	0.00336548	0.0151193	0.00327672	0.0221549	0.00316356	0.0209037	0.00311342	0.0225913	0.00328548	0.0214038	0.0030854	0.0177565	0.00339549	0.0221676	0.00327925	0.0148161	0.0033057	0.0216037	0.00320546	0.0184472	0.0033631	0.0214191	0.00320196	0.020693	0.0033161	0.0229841	0.00331834
																				0.0249453	0.00336507	0.0150911	0.00325978	0.0226156	0.0031642	0.0214326	0.00311357	0.0231373	0.00328752	0.0219328	0.00308635	0.0177388	0.00338079	0.0226113	0.0032798	0.0147926	0.00328876	0.0221327	0.00320611	0.0184269	0.00334841	0.0217945	0.00320315	0.0211025	0.00331546	0.0231273	0.00332424
																				0.0255226	0.00336689	0.0151193	0.00324284	0.0230741	0.00316711	0.0219591	0.00311656	0.0236807	0.00329214	0.0224592	0.0030899	0.0177566	0.00336618	0.0230528	0.00328233	0.0148161	0.00327182	0.0226591	0.00320937	0.0184473	0.00333382	0.0221681	0.00320656	0.0215101	0.00331743	0.023243	0.00333085
																				0.0260859	0.00337091	0.0152036	0.00322605	0.0235214	0.00317223	0.0224726	0.00312235	0.0242109	0.00329924	0.0229728	0.00309599	0.0178097	0.00335176	0.0234835	0.00328681	0.0148864	0.00325504	0.0231727	0.00321517	0.0185082	0.00331945	0.0225325	0.00321213	0.0219077	0.00332199	0.0233279	0.00333798
																				0.0266242	0.00337705	0.0153434	0.00320955	0.0239489	0.00317947	0.0229634	0.00313081	0.0247174	0.0033087	0.0234635	0.00310449	0.0178978	0.00333768	0.0238951	0.00329314	0.0150028	0.00323856	0.0236635	0.0032234	0.0186092	0.00330543	0.0228808	0.00321973	0.0222876	0.00332903	0.0233798	0.00334544
																				0.0271269	0.0033852	0.0155374	0.00319348	0.0243481	0.00318869	0.0234218	0.00314179	0.0251906	0.00332032	0.0239219	0.00311523	0.01802	0.00332403	0.0242796	0.0033012	0.0151645	0.00322252	0.0241219	0.0032339	0.0187494	0.00329187	0.0232061	0.00322922	0.0226425	0.00333843	0.0233972	0.00335303
																				0.0275844	0.00339519	0.0157839	0.00317798	0.0247113	0.00319971	0.0238389	0.00315507	0.0256211	0.00333389	0.024339	0.00312802	0.0181752	0.00331096	0.0246294	0.00331084	0.01537	0.00320706	0.0245389	0.00324646	0.0189275	0.00327889	0.023502	0.00324043	0.0229654	0.00335001
																				0.0279877	0.00340684	0.016081	0.00316317	0.0250316	0.0032123	0.0242065	0.00317039	0.0260006	0.00334913	0.0247066	0.0031426	0.0183623	0.00329855	0.0249378	0.00332186	0.0156175	0.0031923	0.0249066	0.00326085	0.019142	0.00326661	0.0237629	0.00325312	0.0232501	0.00336352
																				0.0283289	0.00341991	0.016426	0.00314919	0.0253025	0.00322624	0.0245176	0.00318746	0.0263216	0.00336575	0.0250177	0.00315868	0.0185795	0.00328693	0.0251987	0.00333405	0.015905	0.00317838	0.0252177	0.00327678	0.0193912	0.00325512	0.0239837	0.00326706	0.023491	0.00337873
																				0.0286014	0.00343414	0.016816	0.00313616	0.0255189	0.00324124	0.0247661	0.00320594	0.0265781	0.00338342	0.0252662	0.00317596	0.0188251	0.00327619	0.0254071	0.00334717	0.01623	0.00316541	0.0254661	0.00329393	0.0196729	0.00324453	0.02416	0.00328197	0.0236834	0.00339531
																				0.0288	0.00344927	0.0172476	0.00312418	0.0256765	0.00325701	0.0249471	0.00322547	0.0267649	0.00340181	0.0254471	0.00319409	0.0190969	0.00326641	0.0255589	0.00336097	0.0165897	0.0031535	0.0256471	0.00331199	0.0199847	0.00323492	0.0242884	0.00329756	0.0238235	0.00341297
																				0.0289207	0.003465	0.0177172	0.00311337	0.0257723	0.00327325	0.0250571	0.00324567	0.0268784	0.00342055	0.0255571	0.00321273	0.0193926	0.0032577	0.0256511	0.00337518	0.0169811	0.00314275	0.0257571	0.00333059	0.0203239	0.00322638	0.0243664	0.00331353	0.0239087	0.00343134
																				0.0289612	0.00348102	0.0182209	0.0031038	0.0258045	0.00328964	0.025094	0.00326615	0.0269164	0.00343928	0.025594	0.00323151	0.0197097	0.00325011	0.0256821	0.00338952	0.0174007	0.00313326	0.025794	0.00334937	0.0206876	0.00321898	0.0243925	0.00332957	0.0239373	0.00345008
																						0.0187542	0.00309557									0.0200455	0.00324371			0.0178452	0.00312511			0.0210728	0.00321279
																						0.0193126	0.00308874									0.0203971	0.00323856			0.0183105	0.00311837			0.0214761	0.00320785
																						0.0198914	0.00308337									0.0207616	0.00323471			0.0187929	0.00311309			0.0218941	0.0032042
																						0.0204856	0.0030795									0.0211357	0.00323218			0.0192881	0.00310932			0.0223233	0.00320189
																						0.0210902	0.00307718									0.0215164	0.00323099			0.0197919	0.00310709			0.02276	0.00320093
																						0.0217	0.00307642									0.0219004	0.00323116			0.0203	0.00310642			0.0232004	0.00320132
																						0.0223098	0.00307722									0.0222843	0.00323269			0.0208082	0.00310732			0.0236408	0.00320307
																						0.0229144	0.00307959									0.022665	0.00323556			0.021312	0.00310978			0.0240774	0.00320615
																						0.0235086	0.00308349									0.0230391	0.00323975			0.0218072	0.00311377			0.0245066	0.00321055
																						0.0240874	0.00308889									0.0234035	0.00324522			0.0222896	0.00311927			0.0249246	0.00321622
																						0.0246459	0.00309576									0.0237551	0.00325192			0.0227549	0.00312622			0.0253279	0.00322312
																						0.0251792	0.00310403									0.0240909	0.0032598			0.0231993	0.00313458			0.025713	0.00323119
																						0.0256828	0.00311363									0.0244079	0.00326879			0.023619	0.00314425			0.0260767	0.00324036
																						0.0261524	0.00312448									0.0247036	0.00327882			0.0240104	0.00315517			0.0264159	0.00325054
																						0.0265841	0.00313648									0.0249754	0.0032898			0.0243701	0.00316725			0.0267276	0.00326166
																						0.026974	0.00314954									0.0252209	0.00330163			0.024695	0.00318036			0.0270093	0.00327362
																						0.027319	0.00316354									0.0254381	0.00331421			0.0249825	0.00319442			0.0272584	0.00328632
																						0.0276161	0.00317837									0.0256251	0.00332744			0.0252301	0.00320929			0.0274729	0.00329965
																						0.0278626	0.00319389									0.0257803	0.00334121			0.0254355	0.00322485			0.0276509	0.00331349
																						0.0280566	0.00320997									0.0259024	0.00335539			0.0255972	0.00324096			0.027791	0.00332772
																						0.0281964	0.00322648									0.0259904	0.00336987			0.0257137	0.00325749			0.0278919	0.00334224
																						0.0282807	0.00324328									0.0260435	0.00338451			0.0257839	0.0032743			0.0279528	0.0033569
																						0.0283089	0.00326022									0.0260612	0.00339921			0.0258074	0.00329124			0.0279731	0.00337159

## Sheet: Sheet5
552	0	0	563.667	0	557.532	0	557.532	0
552.667	0	0	563.667	4649.21	557.532	4649.21	557.532	4649.21
552.667	3
552	3
552	0
ErrBox	ErrBox
552.667	0
553.333	0
553.333	2
552.667	2
552.667	0
ErrBox	ErrBox
553.333	0
554	0
554	8
553.333	8
553.333	0
ErrBox	ErrBox
554	0
554.667	0
554.667	14
554	14
554	0
ErrBox	ErrBox
554.667	0
555.333	0
555.333	19
554.667	19
554.667	0
ErrBox	ErrBox
555.333	0
556	0
556	67
555.333	67
555.333	0
ErrBox	ErrBox
556	0
556.667	0
556.667	113
556	113
556	0
ErrBox	ErrBox
556.667	0
557.333	0
557.333	193
556.667	193
556.667	0
ErrBox	ErrBox
557.333	0
558	0
558	308
557.333	308
557.333	0
ErrBox	ErrBox
558	0
558.667	0
558.667	572
558	572
558	0
ErrBox	ErrBox
558.667	0
559.333	0
559.333	834
558.667	834
558.667	0
ErrBox	ErrBox
559.333	0
560	0
560	1256
559.333	1256
559.333	0
ErrBox	ErrBox
560	0
560.667	0
560.667	1590
560	1590
560	0
ErrBox	ErrBox
560.667	0
561.333	0
561.333	2144
560.667	2144
560.667	0
ErrBox	ErrBox
561.333	0
562	0
562	2658
561.333	2658
561.333	0
ErrBox	ErrBox
562	0
562.667	0
562.667	3123
562	3123
562	0
ErrBox	ErrBox
562.667	0
563.333	0
563.333	3474
562.667	3474
562.667	0
ErrBox	ErrBox
563.333	0
564	0
564	3687
563.333	3687
563.333	0
ErrBox	ErrBox
564	0
564.667	0
564.667	3635
564	3635
564	0
ErrBox	ErrBox
564.667	0
565.333	0
565.333	3547
564.667	3547
564.667	0
ErrBox	ErrBox
565.333	0
566	0
566	3148
565.333	3148
565.333	0
ErrBox	ErrBox
566	0
566.667	0
566.667	2724
566	2724
566	0
ErrBox	ErrBox
566.667	0
567.333	0
567.333	2131
566.667	2131
566.667	0
ErrBox	ErrBox
567.333	0
568	0
568	1667
567.333	1667
567.333	0
ErrBox	ErrBox
568	0
568.667	0
568.667	1159
568	1159
568	0
ErrBox	ErrBox
568.667	0
569.333	0
569.333	796
568.667	796
568.667	0
ErrBox	ErrBox
569.333	0
570	0
570	528
569.333	528
569.333	0
ErrBox	ErrBox
570	0
570.667	0
570.667	311
570	311
570	0
ErrBox	ErrBox
570.667	0
571.333	0
571.333	154
570.667	154
570.667	0
ErrBox	ErrBox
571.333	0
572	0
572	78
571.333	78
571.333	0
ErrBox	ErrBox
572	0
572.667	0
572.667	40
572	40
572	0
ErrBox	ErrBox
572.667	0
573.333	0
573.333	11
572.667	11
572.667	0
ErrBox	ErrBox
573.333	0
574	0
574	5
573.333	5
573.333	0
ErrBox	ErrBox
574	0
574.667	0
574.667	1
574	1
574	0
ErrBox	ErrBox

## Sheet: Sheet12
540	0	0	559.375	0	550.06	0	550.06	0
541.25	0	0	559.375	6286.57	550.06	6286.57	550.06	6286.57
541.25	1
540	1
540	0
ErrBox	ErrBox
542.5	0
543.75	0
543.75	5
542.5	5
542.5	0
ErrBox	ErrBox
543.75	0
545	0
545	4
543.75	4
543.75	0
ErrBox	ErrBox
545	0
546.25	0
546.25	21
545	21
545	0
ErrBox	ErrBox
546.25	0
547.5	0
547.5	65
546.25	65
546.25	0
ErrBox	ErrBox
547.5	0
548.75	0
548.75	119
547.5	119
547.5	0
ErrBox	ErrBox
548.75	0
550	0
550	273
548.75	273
548.75	0
ErrBox	ErrBox
550	0
551.25	0
551.25	530
550	530
550	0
ErrBox	ErrBox
551.25	0
552.5	0
552.5	954
551.25	954
551.25	0
ErrBox	ErrBox
552.5	0
553.75	0
553.75	1497
552.5	1497
552.5	0
ErrBox	ErrBox
553.75	0
555	0
555	2348
553.75	2348
553.75	0
ErrBox	ErrBox
555	0
556.25	0
556.25	3204
555	3204
555	0
ErrBox	ErrBox
556.25	0
557.5	0
557.5	4079
556.25	4079
556.25	0
ErrBox	ErrBox
557.5	0
558.75	0
558.75	4664
557.5	4664
557.5	0
ErrBox	ErrBox
558.75	0
560	0
560	4986
558.75	4986
558.75	0
ErrBox	ErrBox
560	0
561.25	0
561.25	4889
560	4889
560	0
ErrBox	ErrBox
561.25	0
562.5	0
562.5	4281
561.25	4281
561.25	0
ErrBox	ErrBox
562.5	0
563.75	0
563.75	3241
562.5	3241
562.5	0
ErrBox	ErrBox
563.75	0
565	0
565	2287
563.75	2287
563.75	0
ErrBox	ErrBox
565	0
566.25	0
566.25	1311
565	1311
565	0
ErrBox	ErrBox
566.25	0
567.5	0
567.5	716
566.25	716
566.25	0
ErrBox	ErrBox
567.5	0
568.75	0
568.75	323
567.5	323
567.5	0
ErrBox	ErrBox
568.75	0
570	0
570	136
568.75	136
568.75	0
ErrBox	ErrBox
570	0
571.25	0
571.25	44
570	44
570	0
ErrBox	ErrBox
571.25	0
572.5	0
572.5	20
571.25	20
571.25	0
ErrBox	ErrBox
572.5	0
573.75	0
573.75	2
572.5	2
572.5	0
ErrBox	ErrBox

## Sheet: PlotDat23
		0.503	0.06625	0.483784	0.0640155	0.491121	0.0648411	0.498494	0.0656674	0.505903	0.0664943	0.513349	0.0673218	0.520832	0.0681499	0.528352	0.0689787	0.482674	0.064	0.483687	0.064	0.481666	0.064	0.482812	0.0640155	0.526254	0.0670561	0.531806	0.0668983	0.520134	0.0672523	0.533834	0.0672034	0.538582	0.0675756	0.522234	0.0668412	0.51421	0.0661152	0.520806	0.0660738	0.514519	0.0667108
		0.511	0.06648	0.483744	0.0640399	0.491081	0.0648658	0.498453	0.0656924	0.505862	0.0665196	0.513307	0.0673474	0.520789	0.0681759	0.528309	0.0690051	0.482674	0.064	0.484197	0.0640575	0.482674	0.0641142	0.490131	0.0648411	0.526023	0.0671764	0.531715	0.0670015	0.519964	0.0673794	0.533666	0.0673333	0.538389	0.0677106	0.522067	0.0669629	0.514055	0.0662486	0.520717	0.0661837	0.514409	0.0667799
		0.503	0.06684	0.48363	0.0640623	0.490964	0.0648885	0.498334	0.0657154	0.505741	0.0665429	0.513184	0.067371	0.520664	0.0681998	0.528181	0.0690292	0.484197	0.064172	0.485721	0.0642292	0.484197	0.0642866	0.497487	0.0656674	0.525344	0.0672787	0.531447	0.0671001	0.519464	0.0674959	0.533168	0.067457	0.537819	0.0678362	0.521569	0.0670797	0.513593	0.066378	0.520451	0.0662919	0.514084	0.0668437
		0.5167	0.06701	0.483448	0.0640809	0.490779	0.0649074	0.498146	0.0657345	0.50555	0.0665622	0.51299	0.0673906	0.520467	0.0682196	0.527981	0.0690493	0.485721	0.0643441	0.487246	0.064401	0.485721	0.0644589	0.504879	0.0664943	0.52423	0.067361	0.531005	0.0671935	0.518644	0.0675997	0.532349	0.067572	0.536882	0.0679501	0.52075	0.0671893	0.512833	0.0665008	0.52001	0.0663974	0.513554	0.0669004
		0.519	0.06723	0.483215	0.0640942	0.490542	0.0649208	0.497905	0.0657481	0.505305	0.066576	0.512741	0.0674046	0.520213	0.0682338	0.527723	0.0690637	0.487246	0.0645162	0.488774	0.0645728	0.487246	0.0646313	0.512308	0.0673218	0.522703	0.0674216	0.530393	0.0672808	0.517519	0.0676887	0.531225	0.067676	0.535597	0.0680499	0.519627	0.0672896	0.51179	0.0666146	0.519399	0.0664994	0.512833	0.0669485
		0.5051	0.06671	0.48295	0.0641011	0.490272	0.0649279	0.49763	0.0657552	0.505025	0.0665833	0.512456	0.0674119	0.519924	0.0682412	0.527429	0.0690712	0.488774	0.0646883	0.490302	0.0647446	0.488774	0.0648037	0.519773	0.0681499	0.520793	0.0674595	0.529614	0.0673613	0.516111	0.0677612	0.529819	0.0677671	0.533989	0.0681338	0.518221	0.0673786	0.510485	0.0667172	0.518622	0.0665969	0.51194	0.0669865
		0.4983	0.06604	0.482673	0.0641011	0.489991	0.0649279	0.497344	0.0657552	0.504734	0.0665833	0.51216	0.0674119	0.519623	0.0682412	0.527122	0.0690712	0.490302	0.0648604	0.491833	0.0649164	0.490302	0.0649762	0.527276	0.0689787	0.518536	0.0674738	0.528677	0.0674343	0.514448	0.0678158	0.528157	0.0678434	0.53209	0.0682	0.51656	0.0674545	0.508943	0.0668067	0.517687	0.0666892	0.510899	0.0670136
		0.5	0.06598	0.482408	0.0640942	0.48972	0.0649208	0.497069	0.0657481	0.504454	0.066576	0.511876	0.0674046	0.519334	0.0682338	0.526828	0.0690637	0.491833	0.0650326	0.493365	0.0650883	0.491833	0.0651487	IsoLine	IsoLine	0.515977	0.0674642	0.52759	0.0674991	0.512563	0.0678513	0.526272	0.0679035	0.529936	0.0682475	0.514676	0.067516	0.507193	0.0668812	0.5166	0.0667754	0.50974	0.067029
		IsoLine	IsoLine	0.482175	0.0640809	0.489483	0.0649074	0.496828	0.0657345	0.504209	0.0665622	0.511626	0.0673906	0.51908	0.0682196	0.526571	0.0690493	0.493365	0.0652048	0.494898	0.0652602	0.493365	0.0653212			0.513165	0.0674311	0.52636	0.0675552	0.510491	0.0678672	0.524202	0.0679462	0.527568	0.0682751	0.512605	0.0675618	0.505271	0.0669393	0.515372	0.0668549	0.508494	0.0670321
				0.481994	0.0640623	0.489299	0.0648885	0.496641	0.0657154	0.504018	0.0665429	0.511432	0.067371	0.518883	0.0681998	0.52637	0.0690292	0.494898	0.065377	0.496433	0.0654321	0.494898	0.0654937			0.510155	0.0673749	0.525	0.0676022	0.508273	0.0678631	0.521985	0.0679707	0.525034	0.0682823	0.510388	0.067591	0.503212	0.06698	0.514013	0.0669268	0.507194	0.0670231
				0.481879	0.0640399	0.489182	0.0648658	0.496522	0.0656924	0.503897	0.0665196	0.511309	0.0673474	0.518757	0.0681759	0.526243	0.0690051	0.496433	0.0655492	0.49797	0.0656041	0.496433	0.0656663			0.507007	0.0672969	0.52352	0.0676395	0.505953	0.067839	0.519665	0.0679765	0.522383	0.0682691	0.508069	0.0676031	0.501058	0.0670023	0.512534	0.0669907	0.505877	0.067002
				0.481839	0.0640155	0.489142	0.0648411	0.496481	0.0656674	0.503856	0.0664943	0.511267	0.0673218	0.518715	0.0681499	0.526199	0.0689787	0.49797	0.0657215	0.499508	0.0657761	0.49797	0.0658389			0.50378	0.0671985	0.521933	0.067667	0.503575	0.0677956	0.517287	0.0679635	0.519666	0.0682356	0.505691	0.0675978	0.498851	0.067006	0.510948	0.067046	0.504578	0.0669696
				0.481879	0.0639912	0.489182	0.0648165	0.496522	0.0656424	0.503897	0.0664689	0.511309	0.0672961	0.518757	0.068124	0.526243	0.0689524	0.499508	0.0658938	0.501048	0.0659481	0.499508	0.0660115			0.500538	0.0670816	0.520253	0.0676844	0.501186	0.0677335	0.514898	0.0679319	0.516936	0.0681826	0.503302	0.0675752	0.496632	0.0669908	0.509269	0.0670922	0.503332	0.0669266
				0.481994	0.0639688	0.489299	0.0647938	0.496641	0.0656194	0.504018	0.0664456	0.511432	0.0672725	0.518883	0.0681001	0.52637	0.0689283	0.501048	0.0660661	0.502589	0.0661201	0.501048	0.0661841			0.497343	0.0669486	0.518495	0.0676915	0.498833	0.067654	0.512544	0.0678824	0.514246	0.0681111	0.500948	0.0675358	0.494447	0.0669571	0.507511	0.0671289	0.502174	0.0668742
				0.482175	0.0639502	0.489483	0.0647749	0.496828	0.0656003	0.504209	0.0664263	0.511626	0.067253	0.51908	0.0680802	0.526571	0.0689082	0.502589	0.0662385	0.504132	0.0662922	0.502589	0.0663568			0.494259	0.0668019	0.516672	0.0676882	0.49656	0.0675587	0.510271	0.0678159	0.511648	0.0680224	0.498675	0.0674803	0.492336	0.0669056	0.505689	0.0671557	0.501135	0.0668139
				0.482408	0.0639369	0.48972	0.0647615	0.497069	0.0655866	0.504454	0.0664125	0.511876	0.0672389	0.519334	0.0680661	0.526828	0.0688938	0.504132	0.0664109	0.505677	0.0664643	0.504132	0.0665295			0.491346	0.0666445	0.514801	0.0676746	0.494413	0.0674494	0.508124	0.0677337	0.509194	0.0679182	0.496527	0.0674098	0.490341	0.0668372	0.503818	0.0671726	0.500244	0.0667473
				0.482673	0.06393	0.489991	0.0647544	0.497344	0.0655795	0.504734	0.0664053	0.51216	0.0672316	0.519623	0.0680587	0.527122	0.0688863	0.505677	0.0665833	0.507223	0.0666364	0.505677	0.0667023			0.488659	0.0664794	0.512897	0.0676509	0.492433	0.0673282	0.506143	0.0676374	0.50693	0.0678007	0.494546	0.0673256	0.488501	0.0667533	0.501914	0.0671793	0.499524	0.0666762
				0.48295	0.06393	0.490272	0.0647544	0.49763	0.0655795	0.505025	0.0664053	0.512456	0.0672316	0.519924	0.0680587	0.527429	0.0688863	0.507223	0.0667557	0.508771	0.0668086	0.507223	0.066875			0.486251	0.0663099	0.510977	0.0676171	0.490659	0.0671976	0.504367	0.067529	0.504902	0.0676721	0.49277	0.0672295	0.486852	0.0666555	0.499995	0.0671757	0.498996	0.0666026
				0.483215	0.0639369	0.490542	0.0647615	0.497905	0.0655866	0.505305	0.0664125	0.512741	0.0672389	0.520213	0.0680661	0.527723	0.0688938	0.508771	0.0669282	0.51032	0.0669808	0.508771	0.0670478			0.484169	0.0661392	0.509058	0.0675737	0.489125	0.0670599	0.502832	0.0674104	0.503148	0.0675348	0.491234	0.0671233	0.485426	0.0665457	0.498075	0.067162	0.498674	0.0665285
				0.483448	0.0639502	0.490779	0.0647749	0.498146	0.0656003	0.50555	0.0664263	0.51299	0.067253	0.520467	0.0680802	0.527981	0.0689082	0.51032	0.0671007	0.511871	0.067153	0.51032	0.0672206			0.482453	0.0659706	0.507154	0.0675209	0.487861	0.066918	0.501566	0.067284	0.501702	0.0673916	0.489968	0.0670091	0.48425	0.0664261	0.496172	0.0671381	0.498566	0.0664559
				0.48363	0.0639688	0.490964	0.0647938	0.498334	0.0656194	0.505741	0.0664456	0.513184	0.0672725	0.520664	0.0681001	0.528181	0.0689283	0.511871	0.0672732	0.513424	0.0673252	0.511871	0.0673935			0.481138	0.0658075	0.505284	0.0674592	0.486891	0.0667746	0.500595	0.0671523	0.500593	0.0672453	0.488997	0.066889	0.483348	0.066299	0.494301	0.0671044	0.498676	0.0663867
				0.483744	0.0639912	0.491081	0.0648165	0.498453	0.0656424	0.505862	0.0664689	0.513307	0.0672961	0.520789	0.068124	0.528309	0.0689524	0.513424	0.0674458	0.514978	0.0674975	0.513424	0.0675663			0.480248	0.065653	0.503463	0.0673892	0.486235	0.0666325	0.499938	0.0670178	0.499842	0.0670987	0.488339	0.0667654	0.482736	0.0661668	0.492479	0.0670611	0.499001	0.066323
				0.483784	0.0640155	0.491121	0.0648411	0.498494	0.0656674	0.505903	0.0664943	0.513349	0.0673218	0.520832	0.0681499	0.528352	0.0689787	0.514978	0.0676183	0.516534	0.0676698	0.514978	0.0677392			0.479801	0.0655101	0.501706	0.0673115	0.485906	0.0664944	0.499607	0.0668832	0.499465	0.0669546	0.488007	0.0666408	0.482428	0.0660322	0.490721	0.0670086	0.499531	0.0662663
				ConcTikEll	ConcTikEll	ConcTikEll	ConcTikEll	ConcTikEll	ConcTikEll	ConcTikEll	ConcTikEll	ConcTikEll	ConcTikEll	ConcTikEll	ConcTikEll	ConcTikEll	ConcTikEll	0.516534	0.067791	0.518091	0.0678421	0.516534	0.0679122			0.479805	0.0653817	0.500028	0.0672266	0.485909	0.066363	0.499608	0.066751	0.499467	0.0668159	0.488008	0.0665175	0.482429	0.0658977	0.489043	0.0669472	0.500253	0.0662182
																		0.518091	0.0679636	0.51965	0.0680144	0.518091	0.0680851			0.480261	0.0652701	0.498443	0.0671354	0.486245	0.0662409	0.499942	0.0666239	0.49985	0.0666853	0.488342	0.0663979	0.482738	0.065766	0.487457	0.0668777	0.501146	0.0661802
																		0.51965	0.0681363	0.52121	0.0681868	0.51965	0.0682581			0.48116	0.0651776	0.496966	0.0670385	0.486907	0.0661304	0.500603	0.0665043	0.500605	0.0665653	0.489001	0.0662845	0.483351	0.0656396	0.485979	0.0668005	0.502186	0.0661531
																		0.52121	0.068309	0.522772	0.0683592	0.52121	0.0684311			0.482483	0.0651059	0.495609	0.0669369	0.487882	0.0660338	0.501576	0.0663945	0.501718	0.0664582	0.489975	0.0661793	0.484254	0.0655211	0.484621	0.0667162	0.503345	0.0661377
																		0.522772	0.0684817	0.524336	0.0685316	0.522772	0.0686041			0.484206	0.0650566	0.494383	0.0668314	0.489151	0.0659529	0.502844	0.0662967	0.503168	0.0663661	0.491242	0.0660844	0.485431	0.0654126	0.483393	0.0666257	0.504591	0.0661345
																		0.524336	0.0686544	0.525901	0.0687041	0.524336	0.0687772			0.486295	0.0650304	0.493298	0.066723	0.49069	0.0658892	0.504382	0.0662128	0.504926	0.0662908	0.492779	0.0660017	0.486858	0.0653163	0.482308	0.0665297	0.505891	0.0661436
																		0.525901	0.0688272	0.527468	0.0688766	0.525901	0.0689503			0.488709	0.065028	0.492365	0.0666124	0.492469	0.065844	0.50616	0.0661444	0.506958	0.0662338	0.494556	0.0659328	0.488508	0.0652341	0.481373	0.066429	0.507208	0.0661646
																		0.527468	0.069	0.528591	0.069	0.526351	0.069			0.491401	0.0650494	0.491591	0.0665007	0.494453	0.0658183	0.508142	0.0660929	0.509224	0.0661962	0.496539	0.0658791	0.490349	0.0651676	0.480597	0.0663245	0.508507	0.0661971
																		0.527468	0.069	ConcBand	ConcBand	ConcBand	ConcBand			0.494319	0.0650942	0.490982	0.0663888	0.496602	0.0658124	0.510291	0.0660592	0.511681	0.0661788	0.498688	0.0658415	0.492344	0.0651181	0.479987	0.066217	0.509753	0.0662401
																		IsoLine	IsoLine							0.497405	0.0651614	0.490544	0.0662778	0.498877	0.0658265	0.512565	0.066044	0.51428	0.0661817	0.500961	0.0658208	0.494455	0.0650865	0.479547	0.0661075	0.510911	0.0662925
																										0.500601	0.0652499	0.490281	0.0661684	0.501232	0.0658603	0.51492	0.0660477	0.516971	0.0662051	0.503316	0.0658174	0.496641	0.0650735	0.479282	0.0659969	0.51195	0.0663528
																										0.503843	0.0653578	0.490194	0.0660617	0.503621	0.0659132	0.517309	0.06607	0.519701	0.0662485	0.505705	0.0658314	0.49886	0.0650793	0.479194	0.0658862	0.512841	0.0664194
																										0.507069	0.065483	0.490285	0.0659585	0.505998	0.0659842	0.519686	0.0661106	0.522418	0.0663109	0.508082	0.0658625	0.501067	0.0651038	0.479283	0.0657763	0.513561	0.0664904
																										0.510216	0.0656232	0.490553	0.0658599	0.508316	0.0660718	0.522005	0.0661688	0.525068	0.0663913	0.510401	0.06591	0.503221	0.0651465	0.479549	0.0656681	0.514089	0.066564
																										0.513222	0.0657756	0.490995	0.0657665	0.510532	0.0661743	0.524221	0.0662433	0.5276	0.0664879	0.512617	0.0659732	0.505279	0.0652066	0.47999	0.0655626	0.514411	0.0666382
																										0.51603	0.0659373	0.491607	0.0656792	0.5126	0.0662898	0.52629	0.0663328	0.529965	0.066599	0.514687	0.0660507	0.507201	0.0652829	0.480601	0.0654606	0.514519	0.0667108
																										0.518583	0.066105	0.492386	0.0655987	0.514482	0.0664161	0.528173	0.0664354	0.532116	0.0667224	0.51657	0.066141	0.508949	0.065374	0.481378	0.0653631
																										0.520834	0.0662755	0.493323	0.0655257	0.51614	0.0665505	0.529832	0.0665492	0.534012	0.0668557	0.51823	0.0662424	0.510491	0.065478	0.482313	0.0652708
																										0.522737	0.0664456	0.49441	0.0654609	0.517543	0.0666906	0.531236	0.066672	0.535616	0.0669962	0.519634	0.0663529	0.511795	0.065593	0.4834	0.0651846
																										0.524256	0.0666118	0.49564	0.0654048	0.518662	0.0668337	0.532357	0.0668014	0.536896	0.0671413	0.520756	0.0664704	0.512837	0.0657166	0.484628	0.0651051
																										0.525362	0.066771	0.497	0.0653578	0.519477	0.0669768	0.533173	0.0669348	0.537828	0.0672881	0.521572	0.0665925	0.513595	0.0658466	0.485987	0.0650332
																										0.526032	0.0669201	0.49848	0.0653205	0.519971	0.0671173	0.533669	0.0670697	0.538394	0.0674338	0.522068	0.0667169	0.514056	0.0659803	0.487466	0.0649693
																										0.526254	0.0670561	0.500067	0.065293	0.520134	0.0672523	0.533834	0.0672034	0.538582	0.0675756	0.522234	0.0668412	0.51421	0.0661152	0.489052	0.064914
																												0.501747	0.0652756											0.490731	0.0648678
																												0.503505	0.0652685											0.492489	0.0648311
																												0.505328	0.0652718											0.494311	0.0648043
																												0.507199	0.0652854											0.496182	0.0647874
																												0.509103	0.0653091											0.498086	0.0647807
																												0.511023	0.0653429											0.500005	0.0647843
																												0.512942	0.0653863											0.501925	0.064798
																												0.514846	0.0654391											0.503828	0.0648219
																												0.516716	0.0655008											0.505699	0.0648556
																												0.518537	0.0655708											0.507521	0.0648989
																												0.520294	0.0656485											0.509279	0.0649514
																												0.521972	0.0657334											0.510957	0.0650128
																												0.523557	0.0658246											0.512543	0.0650823
																												0.525034	0.0659215											0.514021	0.0651595
																												0.526391	0.0660231											0.515379	0.0652438
																												0.527617	0.0661286											0.516607	0.0653343
																												0.528702	0.066237											0.517692	0.0654303
																												0.529635	0.0663476											0.518627	0.065531
																												0.530409	0.0664593											0.519403	0.0656355
																												0.531018	0.0665712											0.520013	0.065743
																												0.531456	0.0666822											0.520453	0.0658525
																												0.531719	0.0667916											0.520718	0.0659631
																												0.531806	0.0668983											0.520806	0.0660738

## Sheet: PlotDat7
		0.0196	0.00318	0.0179154	0.00279615	0.0189201	0.00295172	0.0199257	0.00310732	0.0209323	0.00326294	0.02194	0.00341858	0.0172659	0.0027	0.0172961	0.0027	0.0172358	0.0027	0.0168834	0.00264061	0.0230268	0.00319066	0.0243164	0.00306446	0.0262522	0.00303898	0.024594	0.00309661	0.0266746	0.00322913	0.024894	0.00317407	0.0242597	0.00313098	0.025094	0.00308797	0.0261507	0.00316405	0.0272074	0.00321203	0.027285	0.00324073	0.0256716	0.00327702	0.025794	0.00305766	0.0254045	0.00305082
		0.0204	0.00306	0.0179142	0.00279719	0.0189188	0.00295281	0.0199243	0.00310847	0.0209309	0.00326414	0.0219385	0.00341984	0.0172659	0.0027	0.0174435	0.00272285	0.0172659	0.00270468	0.0178854	0.00279615	0.0229934	0.00320924	0.0242783	0.00308655	0.0262276	0.00305473	0.024557	0.00311472	0.0266494	0.00324551	0.024857	0.00319599	0.0242298	0.00314649	0.0250571	0.00310669	0.0261054	0.00318614	0.0271839	0.00322783	0.027262	0.00325873	0.0256358	0.00329544	0.0257571	0.00307414	0.0253722	0.00306729
		0.0205	0.00303	0.0179106	0.00279813	0.018915	0.00295382	0.0199204	0.00310952	0.0209268	0.00326525	0.0219341	0.003421	0.0174435	0.00272758	0.0176212	0.00275038	0.0174435	0.0027323	0.0188883	0.00295172	0.022894	0.00322724	0.0241646	0.00310812	0.0261542	0.00307027	0.0244468	0.00313196	0.0265743	0.00326142	0.0247469	0.00321721	0.0241409	0.00316126	0.024947	0.003125	0.0259705	0.00320773	0.0271136	0.00324348	0.0271933	0.00327648	0.0255292	0.00331317	0.025647	0.00309022	0.0252763	0.00308319
		0.0208	0.00307	0.017905	0.00279892	0.0189091	0.00295465	0.0199142	0.0031104	0.0209202	0.00326617	0.0219273	0.00342197	0.0176212	0.00275515	0.0177989	0.00277791	0.0176212	0.00275993	0.0198923	0.00310732	0.0227304	0.00324433	0.0239777	0.00312876	0.0260325	0.00308547	0.0242656	0.00314799	0.02645	0.00327672	0.0245658	0.00323731	0.0239948	0.00317501	0.024766	0.00314255	0.0257486	0.00322839	0.0269972	0.00325884	0.0270794	0.00329383	0.0253539	0.00332986	0.025466	0.0031056	0.0251186	0.00309821
		0.0208	0.00319	0.0178978	0.00279949	0.0189015	0.00295524	0.0199062	0.00311102	0.0209118	0.00326683	0.0219184	0.00342266	0.0177989	0.00278273	0.0179766	0.00280544	0.0177989	0.00278755	0.0208972	0.00326294	0.0225059	0.00326016	0.0237212	0.00314806	0.0258637	0.00310019	0.024017	0.0031625	0.0262775	0.00329128	0.0243172	0.00325592	0.0237943	0.00318748	0.0245175	0.00315901	0.025444	0.00324772	0.0268355	0.00327378	0.0269213	0.00331064	0.0251134	0.0033452	0.0252174	0.00311998	0.0249021	0.00311206
		0.0211	0.00316	0.0178896	0.00279978	0.0188928	0.00295555	0.019897	0.00311135	0.0209022	0.00326717	0.0219084	0.00342302	0.0179766	0.00281031	0.0181543	0.00283297	0.0179766	0.00281518	0.0219031	0.00341858	0.0222248	0.00327443	0.0234	0.00316565	0.025649	0.00311431	0.0237058	0.00317521	0.0260582	0.00330497	0.024006	0.00327265	0.0235433	0.00319843	0.0242063	0.00317404	0.0250626	0.00326534	0.02663	0.00328818	0.0267203	0.00332676	0.0248122	0.00335888	0.0249063	0.00313307	0.0246311	0.00312447
		0.0212	0.003109	0.0178811	0.00279978	0.0188838	0.00295555	0.0198875	0.00311135	0.0208922	0.00326717	0.0218979	0.00342302	0.0181543	0.00283789	0.0183321	0.0028605	0.0181543	0.0028428	IsoLine	IsoLine	0.0218927	0.00328687	0.0230204	0.00318117	0.0253905	0.00312771	0.023338	0.00318588	0.0257941	0.00331769	0.0236382	0.00328719	0.0232467	0.00320763	0.0238386	0.00318736	0.0246118	0.00328091	0.0263825	0.00330192	0.0264783	0.00334206	0.0244563	0.00337063	0.0245386	0.00314463	0.0243108	0.0031352
		0.0213	0.003086	0.0178729	0.00279949	0.0188751	0.00295524	0.0198784	0.00311102	0.0208826	0.00326683	0.0218878	0.00342266	0.0183321	0.00286546	0.0185099	0.00288803	0.0183321	0.00287043			0.0215159	0.00329722	0.0225899	0.00319434	0.0250902	0.00314028	0.0229208	0.00319429	0.0254873	0.00332931	0.0232211	0.00329925	0.0229103	0.00321491	0.0234215	0.0031987	0.0241005	0.00329412	0.026095	0.00331487	0.0261971	0.0033564	0.0240526	0.00338023	0.0241215	0.00315442	0.0239474	0.00314403
		0.0215	0.00316	0.0178657	0.00279892	0.0188675	0.00295465	0.0198704	0.0031104	0.0208742	0.00326617	0.021879	0.00342197	0.0185099	0.00289305	0.0186878	0.00291556	0.0185099	0.00289806			0.0211019	0.0033053	0.0221167	0.0032049	0.0247508	0.00315191	0.0224624	0.00320028	0.0251406	0.00333975	0.0227627	0.00330861	0.0225405	0.00322013	0.0229631	0.00320785	0.0235386	0.00330473	0.02577	0.00332692	0.0258793	0.00336966	0.023609	0.00338749	0.0236631	0.00316225	0.0235482	0.0031508
		0.0217	0.00321	0.0178601	0.00279813	0.0188616	0.00295382	0.0198641	0.00310952	0.0208676	0.00326525	0.0218721	0.003421	0.0186878	0.00292063	0.0188656	0.0029431	0.0186878	0.00292569			0.0206586	0.00331093	0.0216101	0.00321263	0.024375	0.0031625	0.0219715	0.00320373	0.0247568	0.00334891	0.0222719	0.00331507	0.0221447	0.00322319	0.0224723	0.00321463	0.022937	0.00331252	0.0254103	0.00333798	0.0255276	0.00338173	0.023134	0.00339227	0.0231723	0.00316798	0.0231207	0.00315538
		0.0219	0.00323	0.0178565	0.00279719	0.0188579	0.00295281	0.0198602	0.00310847	0.0208635	0.00326414	0.0218678	0.00341984	0.0188656	0.00294821	0.0190436	0.00297063	0.0188656	0.00295332			0.0201947	0.00331402	0.0210799	0.0032174	0.0239663	0.00317196	0.0214579	0.00320459	0.0243393	0.00335671	0.0217582	0.00331852	0.0217305	0.00322403	0.0219588	0.00321891	0.0223075	0.00331734	0.0250189	0.00334795	0.0251449	0.0033925	0.022637	0.00339447	0.0226587	0.00317149	0.0226734	0.00315767
		0.022	0.00326	0.0178553	0.00279615	0.0188566	0.00295172	0.0198588	0.00310732	0.0208621	0.00326294	0.0218663	0.00341858	0.0190436	0.00297579	0.0192215	0.00299817	0.0190436	0.00298095			0.0197192	0.00331449	0.0205365	0.0032191	0.0235279	0.00318021	0.0209315	0.00320282	0.0238916	0.00336309	0.0212318	0.00331887	0.021306	0.00322262	0.0214323	0.0032206	0.0216622	0.0033191	0.0245992	0.00335674	0.0247345	0.00340189	0.0221275	0.00339406	0.0221323	0.00317271	0.0222149	0.00315763
		0.022	0.003054	0.0178565	0.00279512	0.0188579	0.00295063	0.0198602	0.00310617	0.0208635	0.00326173	0.0218678	0.00341732	0.0192215	0.00300337	0.0193995	0.0030257	0.0192215	0.00300858			0.0192414	0.00331235	0.0199904	0.0032177	0.0230637	0.00318717	0.0204025	0.00319846	0.0234175	0.003368	0.0207028	0.00331614	0.0208794	0.00321901	0.0209033	0.00321967	0.0210137	0.00331776	0.0241548	0.00336427	0.0243	0.00340981	0.0216156	0.00339104	0.0216033	0.00317163	0.0217541	0.00315526
		0.0221	0.003038	0.0178601	0.00279417	0.0188616	0.00294963	0.0198641	0.00310511	0.0208676	0.00326062	0.0218721	0.00341616	0.0193995	0.00303096	0.0195775	0.00305324	0.0193995	0.00303621			0.0187706	0.00330764	0.0194524	0.00321324	0.0225777	0.0031928	0.0198812	0.00319161	0.022921	0.00337139	0.0201816	0.00331037	0.020459	0.00321325	0.0203821	0.00321614	0.0203748	0.00331335	0.0236895	0.00337049	0.0238449	0.0034162	0.0211112	0.00338546	0.021082	0.00316825	0.0213001	0.00315061
		IsoLine	IsoLine	0.0178657	0.00279338	0.0188675	0.0029488	0.0198704	0.00310424	0.0208742	0.0032597	0.021879	0.00341519	0.0195775	0.00305854	0.0197555	0.00308078	0.0195775	0.00306384			0.0183159	0.00330044	0.0189327	0.00320579	0.0220739	0.00319703	0.0193779	0.00318239	0.0224065	0.00337322	0.0196782	0.00330167	0.0200531	0.00320547	0.0198787	0.00321007	0.0197577	0.00330595	0.0232071	0.00337535	0.0233733	0.003421	0.020624	0.00337745	0.0205786	0.00316265	0.0208617	0.00314377
				0.0178729	0.00279282	0.0188751	0.0029482	0.0198784	0.00310361	0.0208826	0.00325904	0.0218878	0.0034145	0.0197555	0.00308613	0.0199336	0.00310832	0.0197555	0.00309148			0.0178862	0.00329089	0.0184416	0.0031955	0.0215567	0.00319984	0.0189022	0.00317098	0.0218783	0.0033735	0.0192025	0.00329021	0.0196695	0.0031958	0.0194029	0.00320159	0.0191745	0.00329572	0.0227119	0.00337879	0.0228891	0.00342417	0.0201637	0.00336715	0.0201029	0.00315493	0.0204474	0.00313487
				0.0178811	0.00279252	0.0188838	0.00294789	0.0198875	0.00310328	0.0208922	0.0032587	0.0218979	0.00341414	0.0199336	0.00311371	0.0201116	0.00313586	0.0199336	0.00311911			0.0174899	0.00327919	0.0179887	0.00318258	0.0210305	0.00320121	0.0184634	0.00315761	0.0213408	0.00337221	0.0187637	0.00327622	0.0193156	0.00318445	0.0189641	0.00319086	0.0186366	0.00328284	0.0222081	0.00338079	0.0223965	0.00342568	0.019739	0.00335476	0.0196641	0.00314525	0.0200652	0.00312408
				0.0178896	0.00279252	0.0188928	0.00294789	0.019897	0.00310328	0.0209022	0.0032587	0.0219084	0.00341414	0.0201116	0.0031413	0.0202898	0.0031634	0.0201116	0.00314674			0.0171346	0.00326556	0.0175827	0.00316727	0.0204997	0.00320111	0.0180702	0.00314253	0.0207988	0.00336936	0.0183704	0.00325997	0.0189985	0.00317163	0.0185708	0.00317809	0.0181545	0.00326758	0.0216999	0.00338133	0.0218996	0.00342553	0.0193584	0.00334053	0.0192707	0.0031338	0.0197227	0.00311162
				0.0178978	0.00279282	0.0189015	0.0029482	0.0199062	0.00310361	0.0209118	0.00325904	0.0219184	0.0034145	0.0202898	0.00316889	0.0204679	0.00319094	0.0202898	0.00317438			0.0168274	0.00325026	0.0172315	0.00314987	0.019969	0.00319955	0.01773	0.00312604	0.0202568	0.00336499	0.0180302	0.00324177	0.0187242	0.00315759	0.0182305	0.00316353	0.0177374	0.00325021	0.0211918	0.00338041	0.0214027	0.0034237	0.0190292	0.00332473	0.0189305	0.00312079	0.0194264	0.00309773
				0.017905	0.00279338	0.0189091	0.0029488	0.0199142	0.00310424	0.0209202	0.0032597	0.0219273	0.00341519	0.0204679	0.00319648	0.0206461	0.00321848	0.0204679	0.00320202			0.0165741	0.00323359	0.0169419	0.00313073	0.0194428	0.00319654	0.0174497	0.00310846	0.0197194	0.00335912	0.0177498	0.00322198	0.0184981	0.0031426	0.0179501	0.00314745	0.0173936	0.0032311	0.020688	0.00337804	0.0209101	0.00342022	0.0187579	0.00330767	0.01865	0.00310648	0.0191821	0.00308267
				0.0179106	0.00279417	0.018915	0.00294963	0.0199204	0.00310511	0.0209268	0.00326062	0.0219341	0.00341616	0.0206461	0.00322407	0.0208243	0.00324602	0.0206461	0.00322965			0.0163797	0.00321588	0.0167197	0.00311021	0.0189256	0.00319212	0.0172345	0.00309013	0.0191912	0.00335181	0.0175346	0.00320098	0.0183246	0.00312696	0.0177348	0.00313019	0.0171297	0.0032106	0.0201928	0.00337423	0.0204259	0.00341512	0.0185496	0.00328969	0.0184348	0.00309115	0.0189947	0.00306674
				0.0179142	0.00279512	0.0189188	0.00295063	0.0199243	0.00310617	0.0209309	0.00326173	0.0219385	0.00341732	0.0208243	0.00325166	0.0210026	0.00327356	0.0208243	0.00325729			0.016248	0.00319747	0.0165692	0.00308871	0.0184218	0.00318631	0.0170887	0.00307141	0.0186767	0.00334312	0.0173888	0.00317919	0.018207	0.00311097	0.0175889	0.00311206	0.0169509	0.00318911	0.0197104	0.00336903	0.0199543	0.00340844	0.0184085	0.00327112	0.0182889	0.00307509	0.0188677	0.00305026
				0.0179154	0.00279615	0.0189201	0.00295172	0.0199257	0.00310732	0.0209323	0.00326294	0.02194	0.00341858	0.0210026	0.00327925	0.0211809	0.00330111	0.0210026	0.00328493			0.0161815	0.00317872	0.0164931	0.00306665	0.0179358	0.00317916	0.0170152	0.00305266	0.0181804	0.00333312	0.0173152	0.00315702	0.0181477	0.00309495	0.0175152	0.00309342	0.0168606	0.00316706	0.0192451	0.00336246	0.0194993	0.00340024	0.0183373	0.00325234	0.0182152	0.00305863	0.0188036	0.00303353
				ConcTikEll	ConcTikEll	ConcTikEll	ConcTikEll	ConcTikEll	ConcTikEll	ConcTikEll	ConcTikEll	ConcTikEll	ConcTikEll	0.0211809	0.00330684	0.0213592	0.00332865	0.0211809	0.00331257			0.0161815	0.00316	0.0164932	0.00304446	0.0174716	0.00317075	0.0170153	0.00303425	0.0177064	0.0033219	0.0173153	0.00313491	0.0181478	0.00307919	0.0175152	0.00307464	0.0168606	0.00314487	0.0188007	0.0033546	0.0190648	0.00339059	0.0183374	0.00323371	0.0182152	0.00304207	0.0188036	0.0030169
														0.0213592	0.00333443	0.0215375	0.0033562	0.0213592	0.00334021			0.0162481	0.00314167	0.0165692	0.00302257	0.0170333	0.00316113	0.0170891	0.00301653	0.0172588	0.00330956	0.017389	0.00311329	0.0182073	0.00306402	0.0175889	0.00305608	0.0169509	0.00312297	0.018381	0.0033455	0.0186545	0.00337956	0.0184087	0.00321559	0.0182889	0.00302575	0.0188678	0.00300067
														0.0215375	0.00336202	0.0217159	0.00338374	0.0215375	0.00336785			0.01638	0.00312408	0.0167199	0.00300141	0.0166246	0.0031504	0.0172351	0.00299986	0.0168414	0.00329619	0.017535	0.00309257	0.0183251	0.00304972	0.0177348	0.00303811	0.0171298	0.0031018	0.0179896	0.00333525	0.0182718	0.00336726	0.01855	0.00319834	0.0184348	0.00300998	0.018995	0.00298517
														0.0217159	0.00338962	0.0218943	0.00341129	0.0217159	0.00339549			0.0165745	0.00310758	0.0169421	0.0029814	0.0162489	0.00313863	0.0174505	0.00298455	0.0164578	0.00328192	0.0177504	0.00307317	0.0184988	0.00303657	0.0179501	0.00302106	0.0173937	0.00308176	0.0176299	0.00332392	0.0179201	0.00335379	0.0187584	0.00318228	0.0186501	0.00299506	0.0191826	0.0029707
														0.0218943	0.00341721	0.0220727	0.00343884	0.0218943	0.00342314			0.0168279	0.00309249	0.0172317	0.00296291	0.0159095	0.00312594	0.0177311	0.0029709	0.0161113	0.00326687	0.0180309	0.00305546	0.0187251	0.00302484	0.0182306	0.00300528	0.0177376	0.00306324	0.0173049	0.00331163	0.0176024	0.00333926	0.01903	0.00316774	0.0189307	0.00298129	0.0194269	0.00295754
														0.0220727	0.00344481	0.0222512	0.00346638	0.0220727	0.00345078			0.0171352	0.0030791	0.0175829	0.00294631	0.0156092	0.00311244	0.0180715	0.00295918	0.0158047	0.00325116	0.0183712	0.00303979	0.0189996	0.00301474	0.0185709	0.00299107	0.0181546	0.0030466	0.0170175	0.00329847	0.0173213	0.0033238	0.0193593	0.00315499	0.0192709	0.00296894	0.0197233	0.00294594
														0.0222512	0.0034724	0.0224297	0.00349393	0.0222512	0.00347842			0.0174906	0.00306768	0.017989	0.00293193	0.0153507	0.00309823	0.0184649	0.00294962	0.0155407	0.00323492	0.0187646	0.00302645	0.0193169	0.00300648	0.0189642	0.00297871	0.0186368	0.00303217	0.0167699	0.00328455	0.0170793	0.00330754	0.01974	0.00314429	0.0196643	0.00295824	0.0200659	0.00293614
														0.0224297	0.0035	0.022469	0.0035	0.0223905	0.0035			0.0178869	0.00305845	0.018442	0.00292004	0.0151361	0.00308343	0.0189038	0.0029424	0.0153217	0.00321831	0.0192035	0.00301572	0.0196709	0.00300021	0.0194031	0.00296844	0.0191748	0.00302023	0.0165645	0.00327	0.0168785	0.00329062	0.0201647	0.00313584	0.0201031	0.00294941	0.0204482	0.00292832
														0.0224297	0.0035	ConcBand	ConcBand	ConcBand	ConcBand			0.0183167	0.00305157	0.0189331	0.00291087	0.0149673	0.00306818	0.0193796	0.00293767	0.0151493	0.00320145	0.0196793	0.00300779	0.0200546	0.00299606	0.0198788	0.00296045	0.0197579	0.00301101	0.0164028	0.00325494	0.0167204	0.00327318	0.0206252	0.0031298	0.0205788	0.00294261	0.0208626	0.00292263
														IsoLine	IsoLine							0.0187714	0.0030472	0.0194527	0.0029046	0.0148457	0.00305261	0.019883	0.00293551	0.0150252	0.0031845	0.0201827	0.00300282	0.0204606	0.00299411	0.0203822	0.00295491	0.020375	0.00300469	0.0162863	0.00323949	0.0166066	0.00325538	0.0211124	0.0031263	0.0210823	0.00293798	0.021301	0.00291919
																						0.0192422	0.00304542	0.0199908	0.00290136	0.0147723	0.00303684	0.0204043	0.00293597	0.0149504	0.00316759	0.020704	0.00300092	0.020881	0.0029944	0.0209035	0.00295192	0.021014	0.0030014	0.0162161	0.00322379	0.0165379	0.00323735	0.0216168	0.00312541	0.0216035	0.00293561	0.0217551	0.00291806
																						0.01972	0.00304625	0.0205369	0.00290121	0.0147478	0.00302102	0.0209333	0.00293904	0.0149254	0.00315087	0.021233	0.00300211	0.0213076	0.00299691	0.0214325	0.00295154	0.0216624	0.00300119	0.0161926	0.00320797	0.016515	0.00321927	0.0221288	0.00312713	0.0221325	0.00293554	0.0222158	0.00291927
																						0.0201955	0.00304969	0.0210803	0.00290415	0.0147724	0.00300527	0.0214597	0.00294466	0.0149506	0.00313449	0.0217594	0.00300637	0.0217321	0.00300161	0.0219589	0.00295378	0.0223077	0.00300407	0.0162161	0.00319217	0.016538	0.00320127	0.0226382	0.00313144	0.0226589	0.00293778	0.0226743	0.00292278
																						0.0206594	0.00305566	0.0216104	0.00291012	0.0148458	0.00298973	0.0219733	0.00295271	0.0150257	0.00311858	0.022273	0.00301362	0.0221463	0.0030084	0.0224725	0.00295859	0.0229373	0.00300998	0.0162864	0.00317652	0.0166067	0.00318352	0.0231352	0.00313825	0.0231725	0.00294228	0.0231216	0.00292854
																						0.0211026	0.00306405	0.022117	0.00291901	0.0149675	0.00297453	0.022464	0.00296305	0.01515	0.00310328	0.0227637	0.00302373	0.022542	0.00301714	0.0229632	0.00296588	0.0235389	0.00301882	0.0164028	0.00316116	0.0167206	0.00316617	0.0236101	0.00314743	0.0236633	0.00294895	0.023549	0.00293643
																						0.0215166	0.0030747	0.0225902	0.00293064	0.0151363	0.00295981	0.0229223	0.00297547	0.0153225	0.00308872	0.0232221	0.00303648	0.0229116	0.00302767	0.0234216	0.0029755	0.0241008	0.0030304	0.0165645	0.00314622	0.0168787	0.00314936	0.0240537	0.0031588	0.0241217	0.00295767	0.0239482	0.0029463
																						0.0218933	0.0030874	0.0230207	0.00294479	0.015351	0.00294569	0.0233394	0.00298973	0.0155418	0.00307503	0.0236391	0.00305164	0.0232479	0.00303979	0.0238387	0.00298728	0.024612	0.00304451	0.01677	0.00313182	0.0170797	0.00313324	0.0244573	0.00317214	0.0245388	0.00296827	0.0243115	0.00295795
																						0.0222254	0.0031019	0.0234002	0.00296119	0.0156095	0.00293229	0.023707	0.00300556	0.0158059	0.00306231	0.0240068	0.00306891	0.0235444	0.00305325	0.0242064	0.00300098	0.0250627	0.00306086	0.0170175	0.00311808	0.0173217	0.00311794	0.024813	0.00318719	0.0249065	0.00298053	0.0246317	0.00297116
																						0.0225064	0.00311793	0.0237214	0.0029795	0.0159098	0.00291972	0.024018	0.00302264	0.0161127	0.00305069	0.0243178	0.00308795	0.0237952	0.0030678	0.0245175	0.00301634	0.0254441	0.00307915	0.017305	0.00310513	0.0176029	0.0031036	0.025114	0.00320366	0.0252176	0.00299422	0.0249026	0.00298567
																						0.0227307	0.00313516	0.0239779	0.00299939	0.0162492	0.00290809	0.0242664	0.00304064	0.0164594	0.00304025	0.0245662	0.0031084	0.0239955	0.00308315	0.024766	0.00303305	0.0257487	0.003099	0.01763	0.00309308	0.0179207	0.00309034	0.0253544	0.00322123	0.025466	0.00300908	0.025119	0.0030012
																						0.0228942	0.00315326	0.0241647	0.00302045	0.016625	0.0028975	0.0244473	0.00305921	0.0168432	0.00303109	0.0247472	0.00312984	0.0241414	0.00309901	0.0249471	0.00305079	0.0259706	0.00312005	0.0179897	0.00308202	0.0182724	0.00307827	0.0255296	0.00323955	0.0256471	0.00302481	0.0252766	0.00301745
																						0.0229936	0.00317188	0.0242783	0.00304228	0.0170337	0.00288804	0.0245572	0.00307799	0.0172607	0.00302329	0.0248572	0.00315188	0.02423	0.00311505	0.0250571	0.00306922	0.0261055	0.00314187	0.0183811	0.00307205	0.0186551	0.0030675	0.025636	0.00325826	0.0257571	0.00304111	0.0253724	0.0030341
																						0.0230268	0.00319066	0.0243164	0.00306446	0.0174721	0.00287979	0.024594	0.00309661	0.0177084	0.00301691	0.024894	0.00317407	0.0242597	0.00313098	0.025094	0.00308797	0.0261507	0.00316405	0.0188008	0.00306326	0.0190655	0.00305811	0.0256716	0.00327702	0.025794	0.00305766	0.0254045	0.00305082
																						Red	Red	Red	Red	0.0179363	0.00287283	Red	Red	0.0181825	0.003012	Red	Red	Red	Red	Red	Red	Red	Red	0.0192452	0.00305573	0.0195	0.00305019	Red	Red	Red	Red	Red	Red
																										0.0184223	0.0028672			0.018679	0.00300861									0.0197105	0.00304951	0.0199551	0.0030438
																										0.0189261	0.00286297			0.0191935	0.00300678									0.0201929	0.00304465	0.0204267	0.003039
																										0.0194433	0.00286016			0.0197217	0.0030065									0.0206881	0.00304121	0.0209109	0.00303583
																										0.0199695	0.00285879			0.0202592	0.00300779									0.0211919	0.00303921	0.0214035	0.00303432
																										0.0205003	0.00285889			0.0208012	0.00301064									0.0217001	0.00303867	0.0219004	0.00303447
																										0.021031	0.00286045			0.0213432	0.00301501									0.0222082	0.00303959	0.0223973	0.0030363
																										0.0215572	0.00286346			0.0218806	0.00302088									0.022712	0.00304196	0.0228899	0.00303978
																										0.0220744	0.00286788			0.0224088	0.00302819									0.0232072	0.00304577	0.0233741	0.00304488
																										0.0225782	0.00287369			0.0229233	0.00303688									0.0236896	0.00305097	0.0238457	0.00305156
																										0.0230642	0.00288084			0.0234196	0.00304688									0.0241549	0.00305754	0.0243007	0.00305976
																										0.0235284	0.00288925			0.0238936	0.0030581									0.0245993	0.0030654	0.0247352	0.00306941
																										0.0239667	0.00289887			0.0243412	0.00307044									0.025019	0.0030745	0.0251455	0.00308044
																										0.0243754	0.0029096			0.0247586	0.00308381									0.0254104	0.00308475	0.0255282	0.00309274
																										0.0247511	0.00292137			0.0251422	0.00309808									0.0257701	0.00309608	0.0258799	0.00310621
																										0.0250905	0.00293406			0.0254887	0.00311313									0.0260951	0.00310837	0.0261976	0.00312074
																										0.0253908	0.00294756			0.0257953	0.00312884									0.0263825	0.00312153	0.0264787	0.0031362
																										0.0256493	0.00296177			0.0260593	0.00314508									0.0266301	0.00313545	0.0267207	0.00315246
																										0.0258639	0.00297657			0.0262783	0.00316169									0.0268355	0.00315	0.0269215	0.00316938
																										0.0260327	0.00299182			0.0264507	0.00317855									0.0269972	0.00316506	0.0270796	0.00318682
																										0.0261543	0.00300739			0.0265748	0.0031955									0.0271137	0.00318051	0.0271934	0.00320462
																										0.0262277	0.00302316			0.0266496	0.00321241									0.0271839	0.00319621	0.0272621	0.00322265
																										0.0262522	0.00303898			0.0266746	0.00322913									0.0272074	0.00321203	0.027285	0.00324073
																										Red	Red			Red	Red									Red	Red	Red	Red
[truncated: 2 more columns]

## Sheet: PlotDat12
		0.0127	0.00195	0.0108421	0.0017	0.00989716	0.00155245	0.0178403	0.00196996	0.0143686	0.0019914	0.0148134	0.00215632	0.0146686	0.00202188	0.015391	0.00200171	0.0152686	0.00201572	0.016003	0.00206194	0.0166925	0.00225136	0.016303	0.00205519	0.0159358	0.00206553	0.0161582	0.00204661	0.0161134	0.00197699	0.0163582	0.00201197	0.0165806	0.00200592	0.016703	0.00205152	0.0145985	0.00203297
		0.0129	0.001989	0.0108421	0.0017	0.0103946	0.00163014	0.0177902	0.00199001	0.0143486	0.00200103	0.01479	0.00216782	0.0146486	0.00203145	0.0153693	0.00201252	0.0152486	0.00202616	0.0159729	0.0020739	0.0166661	0.00226765	0.0162815	0.00206778	0.0159107	0.00207765	0.0161314	0.0020583	0.01609	0.0019892	0.0163315	0.00202282	0.0165603	0.00201732	0.0166729	0.00206307	0.0145799	0.00203985
		0.0131	0.002143	0.0110187	0.00172758	0.0108922	0.00170783	0.017641	0.00200929	0.014289	0.00201033	0.0147204	0.00217864	0.014589	0.00204062	0.0153048	0.00202293	0.015189	0.00203628	0.0158835	0.00208538	0.0165879	0.00228308	0.0162175	0.00207994	0.0158362	0.00208924	0.016052	0.00206942	0.0160204	0.00200077	0.0162521	0.00203331	0.0164999	0.00202831	0.0165835	0.00207412	0.0145248	0.0020463
		0.0132	0.002017	0.0111955	0.00175515	0.0113902	0.00178553	0.0173956	0.00202741	0.0141916	0.00201905	0.0146066	0.00218849	0.0144915	0.00204915	0.0151992	0.00203267	0.0150916	0.00204579	0.0157374	0.00209606	0.0164592	0.00229733	0.0161123	0.00209141	0.0157144	0.00209997	0.015922	0.0020797	0.0159067	0.0020114	0.0161222	0.00204317	0.0164005	0.00203867	0.0164374	0.00208438	0.0144358	0.00205202
		0.0138	0.001998	0.0113722	0.00178273	0.0118883	0.00186323	0.0170589	0.00204403	0.0140589	0.00202694	0.0144518	0.0021971	0.0143589	0.00205681	0.0150555	0.00204146	0.0149589	0.00205443	0.0155383	0.00210564	0.0162827	0.00231014	0.015968	0.00210198	0.0155485	0.00210956	0.0157451	0.00208883	0.0157518	0.00202079	0.0159453	0.00205213	0.0162642	0.0020482	0.0162383	0.00209356	0.0143166	0.00205679
		0.0138	0.002014	0.011549	0.00181031	0.0123867	0.00194094	0.0166373	0.00205882	0.0138946	0.00203381	0.0142601	0.00220424	0.0141945	0.00206338	0.0148775	0.00204906	0.0147946	0.00206197	0.0152919	0.00211387	0.0160618	0.00232125	0.0157873	0.00211144	0.0153431	0.00211775	0.015526	0.00209658	0.0155601	0.00202868	0.0157262	0.00205994	0.0160936	0.00205671	0.0159919	0.00210142	0.0141726	0.00206038
		0.0138	0.002056	0.0117258	0.00183789	0.0128854	0.00201866	0.0161391	0.00207148	0.0137032	0.00203945	0.0140367	0.0022097	0.0140031	0.00206868	0.0146701	0.00205527	0.0146032	0.0020682	0.0150047	0.00212052	0.0158007	0.00233045	0.0155738	0.00211961	0.0151038	0.0021243	0.0152708	0.00210273	0.0153368	0.00203486	0.015471	0.00206638	0.0158919	0.00206404	0.0157047	0.00210774	0.0140099	0.00206263
		0.014	0.002223	0.0119026	0.00186546	0.0133843	0.00209638	0.0155739	0.00208179	0.0134899	0.00204372	0.0137878	0.00221334	0.0137898	0.00207257	0.014439	0.00205992	0.0143899	0.00207295	0.0146847	0.00212541	0.0155046	0.00233756	0.0153315	0.00212632	0.0148372	0.00212904	0.0149863	0.00210711	0.0150878	0.00203917	0.0151865	0.00207129	0.0156631	0.00207005	0.0153847	0.00211235	0.0138358	0.00206346
		0.0141	0.002045	0.0120795	0.00189304	0.0138834	0.00217411	0.0149528	0.00208953	0.0132604	0.00204649	0.0135201	0.00221507	0.0135603	0.00207495	0.0141904	0.00206288	0.0141605	0.00207609	0.0143406	0.00212841	0.0151792	0.00234244	0.0150653	0.00213146	0.0145504	0.00213185	0.0146804	0.00210961	0.0148202	0.00204148	0.0148806	0.00207452	0.0154117	0.00207462	0.0150406	0.00211512	0.0136578	0.00206283
		0.0141	0.002058	0.0122564	0.00192063	0.0143828	0.00225184	0.0142879	0.00209455	0.0130212	0.00204769	0.0132409	0.00221483	0.0133211	0.00207575	0.0139312	0.00206407	0.0139212	0.00207754	0.0139817	0.00212943	0.0148308	0.00234499	0.0147804	0.00213491	0.0142513	0.00213264	0.0143614	0.00211016	0.014541	0.00204173	0.0145616	0.002076	0.0151426	0.00207765	0.0146817	0.00211598	0.0134836	0.00206075
		0.0142	0.002038	0.0124333	0.00194821	0.0148824	0.00232958	0.013592	0.00209676	0.0127786	0.0020473	0.012958	0.00221263	0.0130785	0.00207494	0.0136685	0.00206345	0.0136786	0.00207726	0.0136179	0.00212845	0.0144663	0.00234517	0.0144821	0.00213661	0.0139481	0.0021314	0.014038	0.00210874	0.014258	0.00203992	0.0142382	0.00207567	0.0148609	0.0020791	0.0143179	0.0021149	0.013321	0.00205733
		0.0144	0.001966	0.0126103	0.00197579	0.0153823	0.00240733	0.0128788	0.00209611	0.0125394	0.00204531	0.0126788	0.00220853	0.0128393	0.00207255	0.0134093	0.00206106	0.0134394	0.00207525	0.013259	0.00212549	0.0140927	0.00234297	0.0141765	0.00213652	0.013649	0.00212815	0.013719	0.00210539	0.0139789	0.00203609	0.0139192	0.00207355	0.0145722	0.00207893	0.013959	0.00211192	0.013177	0.00205271
		0.0144	0.00201	0.0127873	0.00200337	0.0158824	0.00248508	0.0121621	0.00209262	0.01231	0.00204179	0.0124112	0.00220264	0.0126099	0.00206865	0.0131607	0.00205694	0.01321	0.00207157	0.0129149	0.00212064	0.0137173	0.00233844	0.0138693	0.00213466	0.0133623	0.00212299	0.0134131	0.0021002	0.0137113	0.00203034	0.0136133	0.0020697	0.0142821	0.00207714	0.0136149	0.00210711	0.0130579	0.0020471
		0.0145	0.001996	0.0129643	0.00203096	IsoLine	IsoLine	0.0114559	0.00208635	0.0120966	0.00203683	0.0121624	0.00219513	0.0123966	0.00206334	0.0129297	0.00205121	0.0129967	0.00206632	0.0125949	0.00211403	0.0133474	0.00233166	0.0135666	0.00213105	0.0130957	0.00211606	0.0131287	0.00209331	0.0134624	0.00202284	0.0133289	0.00206423	0.0139963	0.00207378	0.0132949	0.00210061	0.0129689	0.00204073
		0.0145	0.002045	0.0131413	0.00205854			0.0107739	0.00207743	0.0119052	0.00203056	0.0119391	0.00218619	0.0122052	0.00205677	0.0127223	0.00204403	0.0128053	0.00205964	0.0123078	0.00210583	0.0129902	0.00232276	0.0132744	0.00212577	0.0128564	0.00210755	0.0128735	0.00208491	0.0132392	0.0020138	0.0130737	0.00205727	0.0137202	0.0020689	0.0130078	0.00209259	0.0129139	0.00203389
		IsoLine	IsoLine	0.0133184	0.00208613			0.0101294	0.00206603	0.011741	0.00202316	0.0117475	0.00217608	0.0120409	0.00204911	0.0125444	0.0020356	0.012641	0.00205172	0.0120614	0.00209627	0.0126527	0.00231193	0.0129981	0.00211891	0.0126511	0.00209768	0.0126545	0.00207524	0.0130476	0.00200344	0.0128547	0.00204902	0.0134594	0.0020626	0.0127614	0.00208327	0.0128953	0.00202688
				0.0134955	0.00211371			0.00953489	0.00205237	0.0116083	0.00201483	0.0115928	0.00216506	0.0119083	0.00204057	0.0124007	0.00202614	0.0125083	0.00204277	0.0118624	0.00208561	0.0123413	0.00229936	0.0127434	0.00211061	0.0124853	0.00208673	0.0124777	0.00206455	0.0128929	0.00199207	0.0126778	0.00203971	0.0132188	0.00205501	0.0125624	0.00207291	0.012914	0.00202001
				0.0136727	0.0021413			0.00900201	0.00203672	0.0115109	0.00200579	0.0114792	0.00215344	0.0118109	0.00203139	0.0122951	0.00201592	0.0124109	0.00203303	0.0117163	0.00207415	0.0120623	0.0022853	0.012515	0.00210104	0.0123636	0.00207499	0.0123478	0.00205313	0.0127793	0.00197999	0.0125479	0.00202959	0.0130031	0.00204626	0.0124163	0.00206178	0.012969	0.00201356
				0.0138499	0.00216889			0.0085411	0.00201938	0.0114514	0.0019963	0.0114099	0.00214154	0.0117514	0.00202182	0.0122306	0.0020052	0.0123514	0.00202278	0.011627	0.00206219	0.011821	0.00227004	0.0123175	0.00209038	0.0122892	0.0020628	0.0122685	0.00204131	0.0127099	0.00196752	0.0124685	0.00201893	0.0128165	0.00203654	0.012327	0.0020502	0.013058	0.00200783
				0.0140271	0.00219648			0.00816115	0.00200069	0.0114314	0.0019866	0.0113866	0.00212968	0.0117314	0.00201212	0.012209	0.00199429	0.0123314	0.00201228	0.011597	0.00205006	0.0116221	0.00225385	0.0121547	0.00207883	0.0122642	0.00205047	0.0122418	0.00202939	0.0126866	0.00195501	0.0124418	0.00200803	0.0126628	0.00202603	0.012297	0.00203848	0.0131772	0.00200307
				0.0142043	0.00222407			0.00786953	0.00198101	0.0114514	0.00197697	0.01141	0.00211818	0.0117514	0.00200255	0.0122307	0.00198348	0.0123514	0.00200184	0.0116271	0.0020381	0.0114694	0.00223707	0.0120297	0.00206663	0.0122893	0.00203835	0.0122686	0.0020177	0.01271	0.0019428	0.0124685	0.00199718	0.0125448	0.00201494	0.0123271	0.00202693	0.0133212	0.00199948
				0.0143816	0.00225166			0.00767194	0.00196073	0.011511	0.00196767	0.0114796	0.00210736	0.011811	0.00199338	0.0122952	0.00197307	0.012411	0.00199172	0.0117165	0.00202662	0.0113661	0.00222001	0.0119451	0.002054	0.0123638	0.00202676	0.012348	0.00200658	0.0127796	0.00193123	0.0125479	0.00198669	0.0124648	0.00200348	0.0124165	0.00201588	0.0134839	0.00199722
				0.0145589	0.00227925			0.00757221	0.00194024	0.0116084	0.00195895	0.0115934	0.00209751	0.0119085	0.00198485	0.0124008	0.00196333	0.0125084	0.00198221	0.0118626	0.00201594	0.011314	0.00220302	0.0119024	0.0020412	0.0124856	0.00201603	0.012478	0.0019963	0.0128933	0.0019206	0.0126778	0.00197683	0.0124245	0.00199187	0.0125626	0.00200562	0.013658	0.00199639
				0.0147362	0.00230684			0.00757229	0.00191994	0.0117411	0.00195106	0.0117482	0.0020889	0.0120411	0.00197719	0.0125445	0.00195454	0.0126411	0.00197357	0.0120617	0.00200636	0.0113141	0.00218641	0.0119024	0.00202848	0.0126515	0.00200644	0.0126549	0.00198717	0.0130482	0.00191121	0.0128547	0.00196787	0.0124245	0.00198034	0.0127617	0.00199644	0.013836	0.00199703
				0.0149136	0.00233443			0.00767218	0.00190023	0.0119054	0.00194419	0.0119399	0.00208176	0.0122055	0.00197062	0.0127225	0.00194694	0.0128054	0.00196603	0.0123081	0.00199813	0.0113666	0.00217051	0.0119453	0.00201607	0.0128569	0.00199825	0.012874	0.00197942	0.0132399	0.00190332	0.0130738	0.00196006	0.012465	0.00196912	0.0130081	0.00198858	0.0140102	0.0019991
				0.015091	0.00236202			0.00786992	0.00188148	0.0120968	0.00193855	0.0121633	0.0020763	0.0123969	0.00196532	0.0129299	0.00194073	0.0129968	0.0019598	0.0125953	0.00199148	0.0114703	0.00215563	0.01203	0.00200423	0.0130962	0.0019917	0.0131292	0.00197327	0.0134632	0.00189714	0.013329	0.00195362	0.012545	0.00195842	0.0132953	0.00198226	0.0141728	0.00200253
				0.0152684	0.00238962			0.00816168	0.00186407	0.0123101	0.00193428	0.0124122	0.00207266	0.0126102	0.00196143	0.013161	0.00193608	0.0132101	0.00195505	0.0129153	0.00198659	0.0116232	0.00214207	0.0121551	0.00199318	0.0133628	0.00198696	0.0134137	0.00196889	0.0137122	0.00189283	0.0136135	0.00194871	0.0126631	0.00194845	0.0136153	0.00197765	0.0143168	0.00200715
				0.0154458	0.00241721			0.00854177	0.00184833	0.0125396	0.00193151	0.0126799	0.00207093	0.0128397	0.00195905	0.0134096	0.00193312	0.0134395	0.00195191	0.0132594	0.00198359	0.0118224	0.00213008	0.012318	0.00198314	0.0136496	0.00198415	0.0137196	0.00196639	0.0139798	0.00189052	0.0139194	0.00194548	0.012817	0.00193941	0.0139594	0.00197488	0.0144359	0.00201276
				0.0156233	0.00244481			0.00900279	0.00183457	0.0127788	0.00193031	0.0129591	0.00207117	0.0130789	0.00195825	0.0136688	0.00193193	0.0136788	0.00195046	0.0136183	0.00198257	0.012064	0.0021199	0.0125156	0.0019743	0.0139487	0.00198336	0.0140386	0.00196584	0.014259	0.00189027	0.0142384	0.001944	0.0130036	0.00193146	0.0143183	0.00197402	0.0145249	0.00201913
				0.0158008	0.0024724			0.00953578	0.00182305	0.0130214	0.0019307	0.013242	0.00207337	0.0133215	0.00195906	0.0139315	0.00193255	0.0139214	0.00195074	0.0139821	0.00198355	0.0123433	0.00211172	0.012744	0.00196684	0.0142519	0.0019846	0.014362	0.00196726	0.014542	0.00189208	0.0145618	0.00194433	0.0132194	0.00192478	0.0146821	0.0019751	0.0145799	0.00202596
				0.0159784	0.0025			0.0101304	0.00181401	0.0132606	0.00193269	0.0135212	0.00207747	0.0135607	0.00196145	0.0141907	0.00193494	0.0141606	0.00195275	0.014341	0.00198651	0.0126548	0.00210571	0.0129989	0.00196091	0.014551	0.00198785	0.014681	0.00197061	0.0148211	0.00189591	0.0148808	0.00194645	0.01346	0.00191948	0.015041	0.00197808	0.0145985	0.00203297
				0.0159784	0.0025			0.0107749	0.00180762	0.01349	0.00193621	0.0137888	0.00208336	0.0137901	0.00196535	0.0144393	0.00193906	0.01439	0.00195643	0.0146851	0.00199136	0.0129925	0.00210199	0.0132751	0.0019566	0.0148377	0.00199301	0.0149869	0.0019758	0.0150887	0.00190166	0.0151867	0.0019503	0.013721	0.00191567	0.0153851	0.00198289
				IsoLine	IsoLine			0.011457	0.00180399	0.0137034	0.00194117	0.0140376	0.00209087	0.0140034	0.00197066	0.0146703	0.00194479	0.0146033	0.00196168	0.0150051	0.00199797	0.0133498	0.00210062	0.0135675	0.00195402	0.0151043	0.00199994	0.0152713	0.00198269	0.0153376	0.00190916	0.0154711	0.00195577	0.013997	0.00191342	0.0157051	0.00198939
								0.0121633	0.00180321	0.0138948	0.00194744	0.0142609	0.00209981	0.0141948	0.00197723	0.0148777	0.00195197	0.0147947	0.00196836	0.0152922	0.00200617	0.0137198	0.00210163	0.0138701	0.00195321	0.0153436	0.00200845	0.0155265	0.00199109	0.0155608	0.0019182	0.0157263	0.00196273	0.0142829	0.00191279	0.0159922	0.00199741
								0.01288	0.00180528	0.014059	0.00195484	0.0144525	0.00210992	0.0143591	0.00198489	0.0150556	0.0019604	0.014959	0.00197628	0.0155386	0.00201573	0.0140952	0.00210501	0.0141773	0.00195419	0.0155489	0.00201832	0.0157455	0.00200076	0.0157524	0.00192856	0.0159453	0.00197098	0.014573	0.00191377	0.0162386	0.00200673
								0.0135932	0.00181017	0.0141917	0.00196317	0.0146072	0.00212094	0.0144917	0.00199343	0.0151993	0.00196986	0.0150917	0.00198523	0.0157376	0.00202639	0.0144688	0.00211068	0.014483	0.00195693	0.0157147	0.00202927	0.0159223	0.00201145	0.0159071	0.00193993	0.0161222	0.00198029	0.0148617	0.00191635	0.0164376	0.00201709
								0.014289	0.00181779	0.0142891	0.00197221	0.0147208	0.00213256	0.0145891	0.00200261	0.0153049	0.00198008	0.0151891	0.00199497	0.0158837	0.00203785	0.0148332	0.00211853	0.0147812	0.00196139	0.0158364	0.00204101	0.0160522	0.00202287	0.0160207	0.00195201	0.0162521	0.00199041	0.0151433	0.00192048	0.0165837	0.00202822
								0.0149539	0.00182797	0.0143486	0.0019817	0.0147901	0.00214446	0.0146486	0.00201218	0.0153694	0.0019908	0.0152486	0.00200522	0.015973	0.00204981	0.0151815	0.00212842	0.0150661	0.00196747	0.0159108	0.0020532	0.0161315	0.00203469	0.0160901	0.00196448	0.0163315	0.00200107	0.0154124	0.00192608	0.016673	0.0020398
								0.0155749	0.00184053	0.0143686	0.0019914	0.0148134	0.00215632	0.0146686	0.00202188	0.015391	0.00200171	0.0152686	0.00201572	0.016003	0.00206194	0.0155067	0.00214016	0.0153322	0.00197507	0.0159358	0.00206553	0.0161582	0.00204661	0.0161134	0.00197699	0.0163582	0.00201197	0.0156638	0.00193304	0.016703	0.00205152
								0.0161399	0.00185523													0.0158026	0.0021535	0.0155744	0.00198402									0.0158925	0.00194123
								0.016638	0.00187176													0.0160634	0.0021682	0.0157878	0.00199416									0.0160941	0.00195048
								0.0170595	0.00188982													0.0162841	0.00218396	0.0159684	0.0020053									0.0162646	0.00196062
								0.0173961	0.00190905													0.0164603	0.00220048	0.0161127	0.0020172									0.0164009	0.00197145
								0.0176413	0.00192908													0.0165886	0.00221744	0.0162177	0.00202965									0.0165001	0.00198276
								0.0177903	0.00194951													0.0166665	0.00223451	0.0162816	0.00204239									0.0165604	0.00199432
								0.0178403	0.00196996													0.0166925	0.00225136	0.016303	0.00205519									0.0165806	0.00200592

## Sheet: PlotDat13
		0.0127	0.00195	0.0114092	0.00178553	0.0119082	0.00186323	0.0124075	0.00194094	0.0129069	0.00201866	0.0134067	0.00209638	0.0139067	0.00217411	0.0111624	0.00175	0.0111819	0.00175	0.0111431	0.00175	0.0108922	0.00170783	0.0178403	0.00196996	0.0143686	0.0019914	0.0146686	0.00202188	0.015391	0.00200171	0.0152686	0.00201572	0.016003	0.00206194	0.016303	0.00205519	0.0159358	0.00206553	0.0161582	0.00204661	0.0161134	0.00197699	0.0163582	0.00201197	0.0165806	0.00200592	0.016703	0.00205152
		0.0129	0.001989	0.0114084	0.00178619	0.0119074	0.00186392	0.0124066	0.00194166	0.0129061	0.00201941	0.0134058	0.00209716	0.0139057	0.00217491	0.0111624	0.00175	0.0112619	0.00176246	0.0111624	0.00175303	0.0113902	0.00178553	0.0178183	0.0019833	0.0143543	0.00199954	0.0146543	0.00202998	0.0153755	0.00201086	0.0152543	0.00202455	0.0159815	0.00207207	0.0162815	0.00206778	0.0159179	0.00207579	0.0161391	0.00205651	0.0160967	0.00198733	0.0163391	0.00202114	0.0165603	0.00201732	0.0166815	0.0020613
		0.0132	0.002017	0.0114062	0.00178679	0.0119051	0.00186455	0.0124042	0.00194232	0.0129035	0.00202009	0.0134031	0.00209787	0.013903	0.00217565	0.0112619	0.00176551	0.0113613	0.00177794	0.0112619	0.00176857	0.0118883	0.00186323	0.0177526	0.00199635	0.0143117	0.00200748	0.0146117	0.00203783	0.0153294	0.00201975	0.0152117	0.00203318	0.0159176	0.00208188	0.0162175	0.00207994	0.0158646	0.00208571	0.0160823	0.00206604	0.0160469	0.00199726	0.0162823	0.0020301	0.0164999	0.00202831	0.0166176	0.00207075
		0.0138	0.001998	0.0114026	0.0017873	0.0119013	0.00186508	0.0124003	0.00194287	0.0128995	0.00202066	0.0133989	0.00209846	0.0138986	0.00217626	0.0113613	0.00178103	0.0114607	0.00179343	0.0113613	0.00178411	0.0123867	0.00194094	0.0176439	0.00200902	0.0142416	0.00201506	0.0145416	0.00204527	0.0152534	0.00202823	0.0151416	0.00204144	0.0158124	0.00209119	0.0161123	0.00209141	0.015777	0.00209509	0.0159888	0.00207503	0.0159651	0.00200658	0.0161889	0.00203867	0.0164005	0.00203867	0.0165124	0.00207971
		0.0138	0.002014	0.0113981	0.00178766	0.0118966	0.00186546	0.0123953	0.00194326	0.0128943	0.00202107	0.0133936	0.00209888	0.0138931	0.0021767	0.0114607	0.00179654	0.0115602	0.00180892	0.0114607	0.00179965	0.0128854	0.00201866	0.017493	0.00202117	0.0141454	0.00202214	0.0144454	0.00205216	0.0151492	0.00203611	0.0150454	0.00204917	0.0156681	0.00209982	0.015968	0.00210198	0.0156567	0.00210375	0.0158605	0.0020833	0.0158528	0.0020151	0.0160606	0.00204668	0.0162642	0.0020482	0.0163681	0.00208799
		0.0138	0.002056	0.0113929	0.00178785	0.0118911	0.00186565	0.0123897	0.00194346	0.0128884	0.00202128	0.0133874	0.0020991	0.0138867	0.00217693	0.0115602	0.00181206	0.0116597	0.00182441	0.0115602	0.0018152	0.0133843	0.00209638	0.0173011	0.00203272	0.014025	0.00202857	0.0143249	0.00205837	0.0150187	0.00204326	0.014925	0.00205621	0.0154874	0.0021076	0.0157873	0.00211144	0.0155061	0.00211151	0.0156999	0.00209068	0.0157122	0.00202268	0.0159	0.00205397	0.0160936	0.00205671	0.0161874	0.00209543
		0.0141	0.002045	0.0113874	0.00178785	0.0118855	0.00186565	0.0123838	0.00194346	0.0128823	0.00202128	0.0133811	0.0020991	0.0138801	0.00217693	0.0116597	0.00182757	0.0117591	0.00183989	0.0116597	0.00183074	0.0138834	0.00217411	0.01707	0.00204357	0.0138826	0.00203422	0.0141826	0.00206377	0.0148645	0.00204952	0.0147827	0.00206243	0.0152739	0.00211437	0.0155738	0.00211961	0.0153282	0.00211824	0.0155101	0.00209704	0.0155461	0.00202915	0.0157102	0.00206041	0.0158919	0.00206404	0.0159739	0.00210189
		0.0141	0.002058	0.0113822	0.00178766	0.01188	0.00186546	0.0123781	0.00194326	0.0128764	0.00202107	0.0133749	0.00209888	0.0138737	0.0021767	0.0117591	0.00184309	0.0118586	0.00185538	0.0117591	0.00184628	IsoLine	IsoLine	0.0168017	0.00205361	0.0137212	0.002039	0.0140211	0.00206826	0.0146896	0.00205478	0.0146212	0.0020677	0.0150317	0.00212	0.0153315	0.00212632	0.0151263	0.00212379	0.0152947	0.00210225	0.0153577	0.00203439	0.015495	0.00206587	0.0156631	0.00207005	0.0157317	0.00210725
		0.0142	0.002038	0.0113777	0.0017873	0.0118753	0.00186508	0.0123731	0.00194287	0.0128712	0.00202066	0.0133696	0.00209846	0.0138682	0.00217626	0.0118586	0.0018586	0.0119581	0.00187087	0.0118586	0.00186182			0.0164983	0.00206277	0.0135437	0.00204281	0.0138436	0.00207176	0.0144973	0.00205893	0.0144437	0.00207193	0.0147655	0.00212439	0.0150653	0.00213146	0.0149045	0.00212806	0.0150581	0.00210621	0.0151507	0.0020383	0.0152584	0.00207024	0.0154117	0.00207462	0.0154655	0.00211139
		0.0144	0.001966	0.0113741	0.00178679	0.0118716	0.00186455	0.0123693	0.00194232	0.0128672	0.00202009	0.0133654	0.00209787	0.0138638	0.00217565	0.0119581	0.00187412	0.0120576	0.00188636	0.0119581	0.00187736			0.0161626	0.00207097	0.0133537	0.00204557	0.0136537	0.00207419	0.0142915	0.0020619	0.0142538	0.00207503	0.0144806	0.00212744	0.0147804	0.00213491	0.014667	0.00213097	0.0148048	0.00210885	0.014929	0.0020408	0.0150051	0.00207344	0.0151426	0.00207765	0.0151806	0.00211424
		0.0144	0.00201	0.0113719	0.00178619	0.0118692	0.00186392	0.0123668	0.00194166	0.0128646	0.00201941	0.0133627	0.00209716	0.0138611	0.00217491	0.0120576	0.00188963	0.0121571	0.00190185	0.0120576	0.00189291			0.0157973	0.00207814	0.0131549	0.00204722	0.0134548	0.0020755	0.0140761	0.00206363	0.014055	0.00207695	0.0141823	0.00212911	0.0144821	0.00213661	0.0144185	0.00213245	0.0145397	0.0021101	0.0146971	0.00204185	0.01474	0.0020754	0.0148609	0.0020791	0.0148823	0.00211574
		0.0145	0.001996	0.0113711	0.00178553	0.0118684	0.00186323	0.012366	0.00194094	0.0128638	0.00201866	0.0133618	0.00209638	0.0138601	0.00217411	0.0121571	0.00190515	0.0122566	0.00191734	0.0121571	0.00190845			0.0154055	0.00208422	0.0129512	0.00204774	0.0132511	0.00207568	0.0138554	0.00206407	0.0138512	0.00207764	0.0138767	0.00212935	0.0141765	0.00213652	0.0141638	0.00213249	0.014268	0.00210995	0.0144593	0.00204142	0.0144683	0.00207609	0.0145722	0.00207893	0.0145767	0.00211587
		0.0145	0.002045	0.0113719	0.00178487	0.0118692	0.00186255	0.0123668	0.00194023	0.0128646	0.00201791	0.0133627	0.00209561	0.0138611	0.00217331	0.0122566	0.00192067	0.0123562	0.00193283	0.0122566	0.00192399			0.0149907	0.00208914	0.0127464	0.00204712	0.0130463	0.00207471	0.0136335	0.00206324	0.0136464	0.00207709	0.0135695	0.00212817	0.0138693	0.00213466	0.0139078	0.00213108	0.013995	0.0021084	0.0142204	0.00203952	0.0141952	0.00207549	0.0142821	0.00207714	0.0142695	0.00211462
		0.0146	0.002003	0.0113741	0.00178426	0.0118716	0.00186191	0.0123693	0.00193957	0.0128672	0.00201723	0.0133654	0.0020949	0.0138638	0.00217257	0.0123562	0.00193618	0.0124557	0.00194832	0.0123562	0.00193954			0.0145564	0.00209289	0.0125446	0.00204537	0.0128445	0.00207262	0.0134149	0.00206113	0.0134446	0.00207531	0.0132669	0.00212558	0.0135666	0.00213105	0.0136556	0.00212825	0.013726	0.00210548	0.013985	0.00203619	0.0139262	0.00207362	0.0139963	0.00207378	0.0139668	0.00211201
		IsoLine	IsoLine	0.0113777	0.00178376	0.0118753	0.00186139	0.0123731	0.00193902	0.0128712	0.00201666	0.0133696	0.0020943	0.0138682	0.00217196	0.0124557	0.0019517	0.0125553	0.00196381	0.0124557	0.00195508			0.0141062	0.00209541	0.0123497	0.00204252	0.0126497	0.00206945	0.0132038	0.00205779	0.0132498	0.00207234	0.0129746	0.00212164	0.0132744	0.00212577	0.013412	0.00212405	0.0134662	0.00210125	0.0137577	0.0020315	0.0136664	0.00207051	0.0137202	0.0020689	0.0136746	0.00210809
				0.0113822	0.0017834	0.01188	0.00186101	0.0123781	0.00193863	0.0128764	0.00201625	0.0133749	0.00209388	0.0138737	0.00217152	0.0125553	0.00196722	0.0126548	0.0019793	0.0125553	0.00197062			0.013644	0.00209669	0.0121656	0.00203863	0.0124655	0.00206526	0.0130043	0.00205329	0.0130656	0.00206824	0.0126983	0.00211642	0.0129981	0.00211891	0.0131818	0.00211856	0.0132206	0.00209578	0.0135429	0.00202553	0.0134208	0.00206622	0.0134594	0.0020626	0.0133983	0.00210295
				0.0113874	0.00178321	0.0118855	0.00186082	0.0123838	0.00193843	0.0128823	0.00201604	0.0133811	0.00209366	0.0138801	0.00217129	0.0126548	0.00198273	0.0127544	0.00199479	0.0126548	0.00198617			0.0131737	0.00209672	0.0119957	0.00203378	0.0122957	0.00206013	0.0128203	0.00204771	0.0128958	0.00206308	0.0124436	0.00211002	0.0127434	0.00211061	0.0129695	0.00211189	0.0129942	0.00208919	0.0133447	0.0020184	0.0131944	0.00206084	0.0132188	0.00205501	0.0131436	0.00209668
				0.0113929	0.00178321	0.0118911	0.00186082	0.0123897	0.00193843	0.0128884	0.00201604	0.0133874	0.00209366	0.0138867	0.00217129	0.0127544	0.00199825	0.012854	0.00201028	0.0127544	0.00200171			0.0126994	0.0020955	0.0118435	0.00202805	0.0121434	0.00205416	0.0126554	0.00204117	0.0127435	0.00205696	0.0122152	0.00210257	0.012515	0.00210104	0.0127792	0.00210418	0.0127912	0.00208161	0.0131671	0.00201025	0.0129913	0.00205447	0.0130031	0.00204626	0.0129152	0.00208941
				0.0113981	0.0017834	0.0118966	0.00186101	0.0123953	0.00193863	0.0128943	0.00201625	0.0133936	0.00209388	0.0138931	0.00217152	0.012854	0.00201377	0.0129536	0.00202577	0.012854	0.00201726			0.0122252	0.00209304	0.0117118	0.00202156	0.0120117	0.00204746	0.0125127	0.00203378	0.0126118	0.00205001	0.0120176	0.00209422	0.0123175	0.00209038	0.0126146	0.00209557	0.0126156	0.00207317	0.0130135	0.00200124	0.0128157	0.00204724	0.0128165	0.00203654	0.0127176	0.00208127
				0.0114026	0.00178376	0.0119013	0.00186139	0.0124003	0.00193902	0.0128995	0.00201666	0.0133989	0.0020943	0.0138986	0.00217196	0.0129536	0.00202929	0.0130532	0.00204126	0.0129536	0.0020328			0.0117549	0.00208936	0.0116032	0.00201444	0.0119032	0.00204018	0.0123951	0.0020257	0.0125032	0.00204235	0.0118548	0.00208512	0.0121547	0.00207883	0.0124789	0.00208622	0.0124709	0.00206405	0.0128869	0.00199155	0.012671	0.00203927	0.0126628	0.00202603	0.0125548	0.00207243
				0.0114062	0.00178426	0.0119051	0.00186191	0.0124042	0.00193957	0.0129035	0.00201723	0.0134031	0.0020949	0.013903	0.00217257	0.0130532	0.0020448	0.0131528	0.00205675	0.0130532	0.00204835			0.0112928	0.00208449	0.0115199	0.00200682	0.0118199	0.00203244	0.0123049	0.00201708	0.0124199	0.00203415	0.0117298	0.00207545	0.0120297	0.00206663	0.0123748	0.00207633	0.0123598	0.00205443	0.0127897	0.00198135	0.0125599	0.00203074	0.0125448	0.00201494	0.0124298	0.00206305
				0.0114084	0.00178487	0.0119074	0.00186255	0.0124066	0.00194023	0.0129061	0.00201791	0.0134058	0.00209561	0.0139057	0.00217331	0.0131528	0.00206032	0.0132524	0.00207225	0.0131528	0.00206389			0.0108426	0.00207847	0.0114634	0.00199886	0.0117634	0.0020244	0.0122437	0.00200809	0.0123634	0.00202555	0.0116451	0.00206541	0.0119451	0.002054	0.0123042	0.00206608	0.0122845	0.00204448	0.0127239	0.00197086	0.0124846	0.00202181	0.0124648	0.00200348	0.0123451	0.00205332
				0.0114092	0.00178553	0.0119082	0.00186323	0.0124075	0.00194094	0.0129069	0.00201866	0.0134067	0.00209638	0.0139067	0.00217411	0.0132524	0.00207584	0.013352	0.00208774	0.0132524	0.00207944			0.0104083	0.00207135	0.0114349	0.0019907	0.0117349	0.00201622	0.0122128	0.0019989	0.0123349	0.00201673	0.0116024	0.00205518	0.0119024	0.0020412	0.0122686	0.00205567	0.0122466	0.00203441	0.0126907	0.00196028	0.0124466	0.00201264	0.0124245	0.00199187	0.0123024	0.00204342
				ConcTikEll	ConcTikEll	ConcTikEll	ConcTikEll	ConcTikEll	ConcTikEll	ConcTikEll	ConcTikEll	ConcTikEll	ConcTikEll	ConcTikEll	ConcTikEll	0.013352	0.00209136	0.0134517	0.00210323	0.013352	0.00209498			0.00999352	0.0020632	0.0114349	0.00198251	0.0117349	0.00200805	0.0122129	0.0019897	0.0123349	0.00200785	0.0116024	0.00204497	0.0119024	0.00202848	0.0122687	0.00204531	0.0122466	0.00202441	0.0126908	0.0019498	0.0124466	0.00200343	0.0124245	0.00198034	0.0123024	0.00203356
																0.0134517	0.00210688	0.0135513	0.00211872	0.0134517	0.00211053			0.00960185	0.00205409	0.0114635	0.00197445	0.0117635	0.00200006	0.0122438	0.00198065	0.0123635	0.0019991	0.0116452	0.00203497	0.0119453	0.00201607	0.0123044	0.00203519	0.0122847	0.00201467	0.0127241	0.00193964	0.0124846	0.00199434	0.012465	0.00196912	0.0123452	0.00202392
																0.0135513	0.0021224	0.013651	0.00213422	0.0135513	0.00212608			0.00923661	0.00204408	0.01152	0.00196667	0.01182	0.00199239	0.012305	0.00197195	0.0124199	0.00199063	0.01173	0.00202539	0.01203	0.00200423	0.012375	0.00202552	0.01236	0.00200539	0.0127901	0.00193	0.0125599	0.00198555	0.012545	0.00195842	0.01243	0.0020147
																0.013651	0.00213792	0.0137506	0.00214971	0.013651	0.00214162			0.00890092	0.00203327	0.0116033	0.00195933	0.0119034	0.00198521	0.0123953	0.00196375	0.0125033	0.00198262	0.011855	0.0020164	0.0121551	0.00199318	0.0124792	0.00201648	0.0124712	0.00199674	0.0128874	0.00192105	0.012671	0.00197725	0.0126631	0.00194845	0.012555	0.00200606
																0.0137506	0.00215344	0.0138503	0.0021652	0.0137506	0.00215717			0.00859764	0.00202176	0.0117119	0.00195256	0.012012	0.00197864	0.0125129	0.00195621	0.0126119	0.00197522	0.0120179	0.00200817	0.012318	0.00198314	0.012615	0.00200825	0.012616	0.00198889	0.0130141	0.00191298	0.0128158	0.00196958	0.012817	0.00193941	0.0127179	0.00199818
																0.0138503	0.00216896	0.01395	0.0021807	0.0138503	0.00217272			0.00832936	0.00200963	0.0118436	0.0019465	0.0121437	0.00197282	0.0126556	0.00194949	0.0127436	0.00196857	0.0122155	0.00200088	0.0125156	0.0019743	0.0127796	0.00200099	0.0127916	0.001982	0.0131678	0.00190594	0.0129914	0.00196269	0.0130036	0.00193146	0.0129155	0.00199121
																0.01395	0.00218448	0.0140497	0.00219619	0.01395	0.00218826			0.00809837	0.00199699	0.0119959	0.00194127	0.012296	0.00196786	0.0128206	0.00194372	0.0128959	0.00196281	0.0124439	0.00199467	0.012744	0.00196684	0.01297	0.00199483	0.0129947	0.0019762	0.0133455	0.00190007	0.0131945	0.00195673	0.0132194	0.00192478	0.0131439	0.00198528
																0.0140497	0.0022	0.0140742	0.0022	0.0140253	0.0022			0.00790664	0.00198395	0.0121658	0.00193697	0.0124658	0.00196386	0.0130046	0.001939	0.0130657	0.00195805	0.0126987	0.00198964	0.0129989	0.00196091	0.0131824	0.00198991	0.0132212	0.00197161	0.0135437	0.00189548	0.013421	0.00195181	0.01346	0.00191948	0.0133987	0.00198052
																0.0140497	0.0022	ConcBand	ConcBand	ConcBand	ConcBand			0.0077558	0.00197062	0.0123499	0.00193368	0.01265	0.00196089	0.0132041	0.00193543	0.0132499	0.00195437	0.0129749	0.00198591	0.0132751	0.0019566	0.0134126	0.00198631	0.0134667	0.0019683	0.0137586	0.00189227	0.0136665	0.00194801	0.013721	0.00191567	0.0136749	0.00197702
																IsoLine	IsoLine							0.00764715	0.00195712	0.0125448	0.00193147	0.0128449	0.00195902	0.0134152	0.00193308	0.0134448	0.00195186	0.0132672	0.00198355	0.0135675	0.00195402	0.0136562	0.00198411	0.0137266	0.00196635	0.013986	0.00189049	0.0139263	0.00194543	0.013997	0.00191342	0.0139673	0.00197484
																								0.00758161	0.00194355	0.0127466	0.00193037	0.0130467	0.00195827	0.0136338	0.00193199	0.0136466	0.00195055	0.0135699	0.00198259	0.0138701	0.00195321	0.0139084	0.00198334	0.0139956	0.0019658	0.0142214	0.00189018	0.0141954	0.0019441	0.0142829	0.00191279	0.0142699	0.00197402
																								0.00755973	0.00193004	0.0129514	0.00193042	0.0132514	0.00195866	0.0138557	0.00193218	0.0138513	0.00195048	0.0138771	0.00198306	0.0141773	0.00195419	0.0141644	0.00198403	0.0142687	0.00196665	0.0144603	0.00189135	0.0144684	0.00194405	0.014573	0.00191377	0.0145771	0.00197459
																								0.00758171	0.0019167	0.0131551	0.00193161	0.0134552	0.00196019	0.0140764	0.00193366	0.0140551	0.00195165	0.0141827	0.00198495	0.014483	0.00195693	0.0144191	0.00198616	0.0145403	0.00196889	0.014698	0.00189397	0.0147401	0.00194529	0.0148617	0.00191635	0.0148827	0.00197652
																								0.00764736	0.00190365	0.0133539	0.00193392	0.013654	0.00196283	0.0142918	0.00193639	0.0142539	0.00195403	0.0144809	0.00198823	0.0147812	0.00196139	0.0146676	0.00198969	0.0148054	0.00197248	0.0149299	0.00189799	0.0150052	0.00194778	0.0151433	0.00192048	0.015181	0.00197979
																								0.00775611	0.00189098	0.0135439	0.00193729	0.013844	0.00196652	0.0144976	0.00194032	0.0144439	0.00195757	0.0147659	0.00199282	0.0150661	0.00196747	0.014905	0.00199454	0.0150587	0.00197734	0.0151515	0.00190334	0.0152585	0.00195149	0.0154124	0.00192608	0.0154659	0.00198433
																								0.00790705	0.00187883	0.0137213	0.00194168	0.0140214	0.00197119	0.0146898	0.00194537	0.0146213	0.00196222	0.015032	0.00199864	0.0153322	0.00197507	0.0151268	0.00200063	0.0152953	0.00198338	0.0153585	0.0019099	0.0154951	0.00195634	0.0156638	0.00193304	0.0157321	0.00199005
																								0.00809887	0.00186728	0.0138828	0.00194698	0.0141829	0.00197676	0.0148647	0.00195145	0.0147828	0.00196787	0.0152742	0.00200558	0.0155744	0.00198402	0.0153286	0.00200784	0.0155105	0.00199048	0.0155469	0.00191756	0.0157103	0.00196223	0.0158925	0.00194123	0.0159742	0.00199684
																								0.00832995	0.00185643	0.0140251	0.00195311	0.0143252	0.00198311	0.0150189	0.00195843	0.0149251	0.00197442	0.0154877	0.0020135	0.0157878	0.00199416	0.0155065	0.00201603	0.0157003	0.00199851	0.0157129	0.00192616	0.0159001	0.00196905	0.0160941	0.00195048	0.0161877	0.00200456
																								0.00859832	0.00184639	0.0141455	0.00195993	0.0144456	0.00199011	0.0151494	0.00196618	0.0150455	0.00198174	0.0156683	0.00202225	0.0159684	0.0020053	0.015657	0.00202503	0.0158608	0.00200731	0.0158533	0.00193553	0.0160607	0.00197666	0.0162646	0.00196062	0.0163683	0.00201307
																								0.00890168	0.00183723	0.0142417	0.00196732	0.0145418	0.00199765	0.0152535	0.00197455	0.0151417	0.00198969	0.0158126	0.00203166	0.0161127	0.0020172	0.0157772	0.00203467	0.015989	0.00201671	0.0159655	0.0019455	0.0161889	0.00198493	0.0164009	0.00197145	0.0165126	0.00202221
																								0.00923744	0.00182903	0.0143118	0.00197513	0.0146118	0.00200555	0.0153294	0.00198338	0.0152118	0.00199811	0.0159177	0.00204153	0.0162177	0.00202965	0.0158648	0.00204477	0.0160824	0.00202652	0.0160472	0.00195587	0.0162824	0.00199369	0.0165001	0.00198276	0.0166177	0.00203179
																								0.00960275	0.00182186	0.0143544	0.00198321	0.0146544	0.00201368	0.0153756	0.00199249	0.0152544	0.00200684	0.0159816	0.00205169	0.0162816	0.00204239	0.015918	0.00205512	0.0161392	0.00203655	0.0160968	0.00196643	0.0163391	0.00200276	0.0165604	0.00199432	0.0166816	0.00204162
																								0.00999448	0.00181578	0.0143686	0.0019914	0.0146686	0.00202188	0.015391	0.00200171	0.0152686	0.00201572	0.016003	0.00206194	0.016303	0.00205519	0.0159358	0.00206553	0.0161582	0.00204661	0.0161134	0.00197699	0.0163582	0.00201197	0.0165806	0.00200592	0.016703	0.00205152
																								0.0104093	0.00181086
																								0.0108436	0.00180711
																								0.0112938	0.00180459
																								0.011756	0.00180331
																								0.0122263	0.00180328
																								0.0127006	0.0018045
																								0.0131748	0.00180696
																								0.0136451	0.00181064
																								0.0141072	0.00181551
																								0.0145574	0.00182153
																								0.0149917	0.00182865
																								0.0154065	0.0018368
																								0.0157982	0.00184591
																								0.0161634	0.00185592
																								0.0164991	0.00186673
																								0.0168024	0.00187824
																								0.0170706	0.00189037
																								0.0173016	0.00190301
																								0.0174934	0.00191605
																								0.0176442	0.00192938
																								0.0177528	0.00194288
																								0.0178184	0.00195645
																								0.0178403	0.00196996
[truncated: 4 more columns]

## Sheet: PlotDat14
		0.0129	0.001989	0.0119082	0.00186323	0.0123076	0.0019254	0.0127071	0.00198757	0.0131068	0.00204975	0.0135067	0.00211193	0.0139067	0.00217411	0.0118035	0.00185	0.011824	0.00185	0.0117829	0.00185	0.0118883	0.00186323	0.0143686	0.0019914	0.0146686	0.00202188	0.015391	0.00200171	0.0152686	0.00201572	0.016003	0.00206194	0.016303	0.00205519	0.0159358	0.00206553	0.0161582	0.00204661	0.0161134	0.00197699	0.0163582	0.00201197	0.0165806	0.00200592	0.016703	0.00205152	0.0163134	0.00201125
		0.0132	0.002017	0.0119074	0.00186392	0.0123068	0.00192611	0.0127063	0.00198831	0.0131059	0.0020505	0.0135057	0.00211271	0.0139057	0.00217491	0.0118035	0.00185	0.0118808	0.00185884	0.0118035	0.0018532	0.012287	0.0019254	0.0143543	0.00199954	0.0146543	0.00202998	0.0153755	0.00201086	0.0152543	0.00202455	0.0159936	0.00206867	0.0162935	0.00206356	0.015928	0.00207235	0.0161498	0.00205319	0.0161061	0.00198387	0.0163391	0.00202114	0.0165717	0.0020135	0.0166936	0.00205802	0.0163061	0.00201818
		0.0138	0.001998	0.0119051	0.00186455	0.0123043	0.00192677	0.0127037	0.00198898	0.0131033	0.0020512	0.0135031	0.00211342	0.013903	0.00217565	0.0118808	0.00186207	0.0119582	0.00187089	0.0118808	0.00186529	0.0126859	0.00198757	0.0143117	0.00200748	0.0146117	0.00203783	0.0153294	0.00201975	0.0152117	0.00203318	0.0159654	0.00207529	0.0162654	0.00207177	0.0159045	0.00207905	0.0161248	0.00205964	0.0160842	0.0019906	0.0162823	0.0020301	0.0165451	0.00202093	0.0166654	0.0020644	0.0162842	0.00202497
		0.0138	0.002014	0.0119013	0.00186508	0.0123005	0.00192731	0.0126998	0.00198954	0.0130992	0.00205178	0.0134989	0.00211402	0.0138986	0.00217626	0.0119582	0.00187413	0.0120356	0.00188293	0.0119582	0.00187738	0.0130849	0.00204975	0.0142416	0.00201506	0.0145416	0.00204527	0.0152534	0.00202823	0.0151416	0.00204144	0.0159188	0.00208174	0.0162188	0.00207976	0.0158656	0.00208557	0.0160834	0.0020659	0.0160479	0.00199712	0.0161889	0.00203867	0.0165011	0.00202815	0.0166188	0.00207062	0.0162479	0.00203158
		0.0138	0.002056	0.0118966	0.00186546	0.0122956	0.0019277	0.0126947	0.00198994	0.013094	0.00205219	0.0134934	0.00211445	0.0138931	0.0021767	0.0120356	0.0018862	0.012113	0.00189498	0.0120356	0.00188947	0.0134841	0.00211193	0.0141454	0.00202214	0.0144454	0.00205216	0.0151492	0.00203611	0.0150454	0.00204917	0.0158541	0.00208798	0.0161541	0.00208745	0.0158117	0.00209185	0.0160259	0.00207193	0.0159975	0.00200337	0.0160606	0.00204668	0.0164399	0.0020351	0.0165541	0.00207662	0.0161976	0.00203794
		0.0141	0.002045	0.0118911	0.00186565	0.0122899	0.0019279	0.0126889	0.00199015	0.013088	0.00205241	0.0134873	0.00211467	0.0138867	0.00217693	0.012113	0.00189827	0.0121904	0.00190703	0.012113	0.00190156	0.0138834	0.00217411	0.014025	0.00202857	0.0143249	0.00205837	0.0150187	0.00204326	0.014925	0.00205621	0.0157719	0.00209394	0.0160718	0.00209478	0.0157432	0.00209785	0.0159528	0.00207767	0.0159336	0.0020093	0.0159	0.00205397	0.0163623	0.00204171	0.0164719	0.00208235	0.0161336	0.00204401
		0.0141	0.002058	0.0118855	0.00186565	0.0122841	0.0019279	0.0126828	0.00199015	0.0130818	0.00205241	0.0134808	0.00211467	0.0138801	0.00217693	0.0121904	0.00191034	0.0122678	0.00191907	0.0121904	0.00191365	IsoLine	IsoLine	0.0138826	0.00203422	0.0141826	0.00206377	0.0148645	0.00204952	0.0147827	0.00206243	0.0156729	0.00209958	0.0159728	0.00210168	0.0156607	0.0021035	0.0158647	0.00208306	0.0158565	0.00201487	0.0157102	0.00206041	0.0162687	0.00204793	0.0163729	0.00208776	0.0160566	0.00204972
		0.0142	0.002038	0.01188	0.00186546	0.0122785	0.0019277	0.012677	0.00198994	0.0130758	0.00205219	0.0134747	0.00211445	0.0138737	0.0021767	0.0122678	0.0019224	0.0123452	0.00193112	0.0122678	0.00192573			0.0137212	0.002039	0.0140211	0.00206826	0.0146896	0.00205478	0.0146212	0.0020677	0.0155579	0.00210485	0.0158578	0.0021081	0.0155648	0.00210877	0.0157625	0.00208808	0.0157671	0.00202001	0.015495	0.00206587	0.0161601	0.00205371	0.0162579	0.0020928	0.0159671	0.00205504
		0.0144	0.001966	0.0118753	0.00186508	0.0122735	0.00192731	0.012672	0.00198954	0.0130705	0.00205178	0.0134693	0.00211402	0.0138682	0.00217626	0.0123452	0.00193447	0.0124226	0.00194317	0.0123452	0.00193782			0.0135437	0.00204281	0.0138436	0.00207176	0.0144973	0.00205893	0.0144437	0.00207193	0.0154279	0.0021097	0.0157277	0.00211398	0.0154565	0.0021136	0.0156469	0.00209266	0.0156659	0.0020247	0.0152584	0.00207024	0.0160373	0.002059	0.0161279	0.00209744	0.015866	0.00205992
		0.0144	0.00201	0.0118716	0.00186455	0.0122697	0.00192677	0.012668	0.00198898	0.0130664	0.0020512	0.0134651	0.00211342	0.0138638	0.00217565	0.0124226	0.00194654	0.0125	0.00195521	0.0124226	0.00194991			0.0133537	0.00204557	0.0136537	0.00207419	0.0142915	0.0020619	0.0142538	0.00207503	0.015284	0.00211409	0.0155838	0.00211928	0.0153366	0.00211796	0.015519	0.00209678	0.015554	0.00202889	0.0150051	0.00207344	0.0159014	0.00206375	0.015984	0.00210163	0.0157541	0.0020643
		0.0145	0.001996	0.0118692	0.00186392	0.0122673	0.00192611	0.0126655	0.00198831	0.0130639	0.0020505	0.0134624	0.00211271	0.0138611	0.00217491	0.0125	0.00195861	0.0125775	0.00196726	0.0125	0.001962			0.0131549	0.00204722	0.0134548	0.0020755	0.0140761	0.00206363	0.014055	0.00207695	0.0151274	0.00211799	0.0154273	0.00212394	0.0152061	0.00212181	0.0153798	0.0021004	0.0154322	0.00203254	0.01474	0.0020754	0.0157535	0.00206792	0.0158274	0.00210534	0.0156323	0.00206817
		0.0145	0.002045	0.0118684	0.00186323	0.0122664	0.0019254	0.0126646	0.00198757	0.013063	0.00204975	0.0134615	0.00211193	0.0138601	0.00217411	0.0125775	0.00197068	0.0126549	0.00197931	0.0125775	0.00197409			0.0129512	0.00204774	0.0132511	0.00207568	0.0138554	0.00206407	0.0138512	0.00207764	0.0149595	0.00212136	0.0152594	0.00212792	0.0150662	0.00212511	0.0152306	0.00210349	0.0153016	0.00203562	0.0144683	0.00207609	0.015595	0.00207148	0.0156595	0.00210853	0.0155017	0.00207148
		0.0146	0.002003	0.0118692	0.00186255	0.0122673	0.00192469	0.0126655	0.00198684	0.0130639	0.00204899	0.0134624	0.00211115	0.0138611	0.00217331	0.0126549	0.00198274	0.0127323	0.00199136	0.0126549	0.00198618			0.0127464	0.00204712	0.0130463	0.00207471	0.0136335	0.00206324	0.0136464	0.00207709	0.0147818	0.00212417	0.0150816	0.0021312	0.014918	0.00212785	0.0150726	0.00210602	0.0151633	0.00203811	0.0141952	0.00207549	0.015427	0.00207439	0.0154818	0.00211118	0.0153634	0.0020742
		IsoLine	IsoLine	0.0118716	0.00186191	0.0122697	0.00192404	0.012668	0.00198616	0.0130664	0.0020483	0.0134651	0.00211043	0.0138638	0.00217257	0.0127323	0.00199481	0.0128098	0.00200341	0.0127323	0.00199827			0.0125446	0.00204537	0.0128445	0.00207262	0.0134149	0.00206113	0.0134446	0.00207531	0.0145956	0.00212639	0.0148954	0.00213374	0.0147629	0.00212998	0.0149071	0.00210796	0.0150185	0.00203998	0.0139262	0.00207362	0.0152512	0.00207663	0.0152956	0.00211327	0.0152186	0.00207632
				0.0118753	0.00186139	0.0122735	0.00192349	0.012672	0.0019856	0.0130705	0.00204772	0.0134693	0.00210983	0.0138682	0.00217196	0.0128098	0.00200688	0.0128872	0.00201545	0.0128098	0.00201036			0.0123497	0.00204252	0.0126497	0.00206945	0.0132038	0.00205779	0.0132498	0.00207234	0.0144027	0.00212802	0.0147025	0.00213553	0.0146021	0.0021315	0.0147356	0.00210931	0.0148684	0.00204122	0.0136664	0.00207051	0.015069	0.00207819	0.0151027	0.00211477	0.0150686	0.00207781
				0.01188	0.00186101	0.0122785	0.00192311	0.012677	0.0019852	0.0130758	0.0020473	0.0134747	0.00210941	0.0138737	0.00217152	0.0128872	0.00201895	0.0129647	0.0020275	0.0128872	0.00202245			0.0121656	0.00203863	0.0124655	0.00206526	0.0130043	0.00205329	0.0130656	0.00206824	0.0142046	0.00212904	0.0145044	0.00213654	0.014437	0.00213239	0.0145595	0.00211005	0.0147144	0.00204182	0.0134208	0.00206622	0.0148819	0.00207905	0.0149046	0.00211568	0.0149145	0.00207866
				0.0118855	0.00186082	0.0122841	0.0019229	0.0126828	0.00198499	0.0130818	0.00204709	0.0134808	0.00210919	0.0138801	0.00217129	0.0129647	0.00203102	0.0130421	0.00203955	0.0129647	0.00203454			0.0119957	0.00203378	0.0122957	0.00206013	0.0128203	0.00204771	0.0128958	0.00206308	0.0140031	0.00212943	0.0143028	0.00213677	0.0142691	0.00213265	0.0143804	0.00211018	0.0145576	0.00204177	0.0131944	0.00206084	0.0146916	0.00207919	0.0147031	0.00211598	0.0147577	0.00207887
				0.0118911	0.00186082	0.0122899	0.0019229	0.0126889	0.00198499	0.013088	0.00204709	0.0134873	0.00210919	0.0138867	0.00217129	0.0130421	0.00204309	0.0131196	0.0020516	0.0130421	0.00204663			0.0118435	0.00202805	0.0121434	0.00205416	0.0126554	0.00204117	0.0127435	0.00205696	0.0137998	0.00212919	0.0140996	0.00213622	0.0140997	0.00213228	0.0141997	0.00210969	0.0143995	0.00204108	0.0129913	0.00205447	0.0144996	0.00207863	0.0144998	0.00211568	0.0145996	0.00207843
				0.0118966	0.00186101	0.0122956	0.00192311	0.0126947	0.0019852	0.013094	0.0020473	0.0134934	0.00210941	0.0138931	0.00217152	0.0131196	0.00205516	0.0131971	0.00206365	0.0131196	0.00205872			0.0117118	0.00202156	0.0120117	0.00204746	0.0125127	0.00203378	0.0126118	0.00205001	0.0135965	0.00212833	0.0138963	0.00213489	0.0139303	0.00213126	0.014019	0.00210859	0.0142414	0.00203975	0.0128157	0.00204724	0.0143076	0.00207736	0.0142965	0.00211478	0.0144415	0.00207735
				0.0119013	0.00186139	0.0123005	0.00192349	0.0126998	0.0019856	0.0130992	0.00204772	0.0134989	0.00210983	0.0138986	0.00217196	0.0131971	0.00206723	0.0132746	0.00207569	0.0131971	0.00207081			0.0116032	0.00201444	0.0119032	0.00204018	0.0123951	0.0020257	0.0125032	0.00204235	0.013395	0.00212685	0.0136948	0.0021328	0.0137624	0.00212963	0.0138399	0.00210689	0.0140847	0.00203778	0.012671	0.00203927	0.0141173	0.0020754	0.014095	0.00211328	0.0142848	0.00207563
				0.0119051	0.00186191	0.0123043	0.00192404	0.0127037	0.00198616	0.0131033	0.0020483	0.0135031	0.00211043	0.013903	0.00217257	0.0132746	0.0020793	0.0133521	0.00208774	0.0132746	0.0020829			0.0115199	0.00200682	0.0118199	0.00203244	0.0123049	0.00201708	0.0124199	0.00203415	0.0131969	0.00212477	0.0134967	0.00212995	0.0135973	0.00212738	0.0136638	0.0021046	0.0139306	0.00203521	0.0125599	0.00203074	0.0139302	0.00207276	0.0138969	0.0021112	0.0141308	0.00207329
				0.0119074	0.00186255	0.0123068	0.00192469	0.0127063	0.00198684	0.0131059	0.00204899	0.0135057	0.00211115	0.0139057	0.00217331	0.0133521	0.00209137	0.0134295	0.00209979	0.0133521	0.00209499			0.0114634	0.00199886	0.0117634	0.0020244	0.0122437	0.00200809	0.0123634	0.00202555	0.013004	0.0021221	0.0133038	0.00212638	0.0134365	0.00212454	0.0134923	0.00210174	0.0137806	0.00203204	0.0124846	0.00202181	0.013748	0.00206947	0.013704	0.00210856	0.0139807	0.00207036
				0.0119082	0.00186323	0.0123076	0.0019254	0.0127071	0.00198757	0.0131068	0.00204975	0.0135067	0.00211193	0.0139067	0.00217411	0.0134295	0.00210344	0.013507	0.00211184	0.0134295	0.00210708			0.0114349	0.0019907	0.0117349	0.00201622	0.0122128	0.0019989	0.0123349	0.00201673	0.0128179	0.00211887	0.0131177	0.00212212	0.0132814	0.00212113	0.0133269	0.00209834	0.0136358	0.00202831	0.0124466	0.00201264	0.0135723	0.00206555	0.0135179	0.00210537	0.0138359	0.00206684
				ConcTikEll	ConcTikEll	ConcTikEll	ConcTikEll	ConcTikEll	ConcTikEll	ConcTikEll	ConcTikEll	ConcTikEll	ConcTikEll	ConcTikEll	ConcTikEll	0.013507	0.00211551	0.0135845	0.00212389	0.013507	0.00211917			0.0114349	0.00198251	0.0117349	0.00200805	0.0122129	0.0019897	0.0123349	0.00200785	0.0126401	0.0021151	0.0129399	0.0021172	0.0131333	0.00211719	0.0131689	0.00209442	0.0134976	0.00202405	0.0124466	0.00200343	0.0134044	0.00206103	0.0133401	0.00210166	0.0136977	0.00206279
																0.0135845	0.00212758	0.0136621	0.00213594	0.0135845	0.00213126			0.0114635	0.00197445	0.0117635	0.00200006	0.0122438	0.00198065	0.0123635	0.0019991	0.0124723	0.00211083	0.0127721	0.00211166	0.0129934	0.00211273	0.0130197	0.00209002	0.013367	0.00201929	0.0124846	0.00199434	0.0132459	0.00205596	0.0131722	0.00209748	0.0135671	0.00205822
																0.0136621	0.00213965	0.0137396	0.00214799	0.0136621	0.00214335			0.01152	0.00196667	0.01182	0.00199239	0.012305	0.00197195	0.0124199	0.00199063	0.0123157	0.00210609	0.0126156	0.00210555	0.012863	0.00210782	0.0128805	0.00208518	0.0132453	0.00201408	0.0125599	0.00198555	0.013098	0.00205038	0.0130157	0.00209284	0.0134454	0.00205318
																0.0137396	0.00215172	0.0138171	0.00216004	0.0137396	0.00215544			0.0116033	0.00195933	0.0119034	0.00198521	0.0123953	0.00196375	0.0125033	0.00198262	0.0121719	0.00210092	0.0124717	0.00209893	0.0127431	0.00210247	0.0127527	0.00207993	0.0131334	0.00200846	0.012671	0.00197725	0.0129622	0.00204434	0.0128718	0.0020878	0.0133335	0.00204772
																0.0138171	0.00216379	0.0138946	0.00217209	0.0138171	0.00216754			0.0117119	0.00195256	0.012012	0.00197864	0.0125129	0.00195621	0.0126119	0.00197522	0.0120419	0.00209537	0.0123417	0.00209185	0.0126348	0.00209675	0.0126371	0.00207433	0.0130324	0.00200248	0.0128158	0.00196958	0.0128394	0.00203788	0.0127419	0.00208239	0.0132324	0.00204187
																0.0138946	0.00217586	0.0139722	0.00218414	0.0138946	0.00217963			0.0118436	0.0019465	0.0121437	0.00197282	0.0126556	0.00194949	0.0127436	0.00196857	0.0119269	0.00208948	0.0122268	0.00208436	0.012539	0.0020907	0.0125349	0.00206842	0.012943	0.00199618	0.0129914	0.00196269	0.0127308	0.00203107	0.0126269	0.00207667	0.013143	0.00203569
																0.0139722	0.00218793	0.0140497	0.00219619	0.0139722	0.00219172			0.0119959	0.00194127	0.012296	0.00196786	0.0128206	0.00194372	0.0128959	0.00196281	0.0118279	0.00208331	0.0121278	0.00207654	0.0124565	0.00208437	0.012447	0.00206225	0.012866	0.00198963	0.0131945	0.00195673	0.0126374	0.00202395	0.0125279	0.00207067	0.013066	0.00202924
																0.0140497	0.0022	0.0140742	0.0022	0.0140253	0.0022			0.0121658	0.00193697	0.0124658	0.00196386	0.0130046	0.001939	0.0130657	0.00195805	0.0117457	0.0020769	0.0120456	0.00206846	0.012388	0.00207781	0.0123739	0.00205587	0.0128021	0.00198288	0.013421	0.00195181	0.0125598	0.0020166	0.0124457	0.00206445	0.0130021	0.00202255
																0.0140497	0.0022	ConcBand	ConcBand	ConcBand	ConcBand			0.0123499	0.00193368	0.01265	0.00196089	0.0132041	0.00193543	0.0132499	0.00195437	0.0116811	0.00207032	0.011981	0.00206017	0.0123342	0.00207108	0.0123165	0.00204934	0.0127519	0.00197598	0.0136665	0.00194801	0.0124987	0.00200907	0.0123811	0.00205807	0.0129519	0.00201571
																IsoLine	IsoLine							0.0125448	0.00193147	0.0128449	0.00195902	0.0134152	0.00193308	0.0134448	0.00195186	0.0116345	0.00206361	0.0119345	0.00205175	0.0122954	0.00206425	0.0122751	0.00204271	0.0127157	0.001969	0.0139263	0.00194543	0.0124548	0.00200143	0.0123345	0.00205158	0.0129157	0.00200875
																								0.0127466	0.00193037	0.0130467	0.00195827	0.0136338	0.00193199	0.0136466	0.00195055	0.0116064	0.00205684	0.0119064	0.00204328	0.012272	0.00205735	0.0122501	0.00203604	0.0126938	0.00196199	0.0141954	0.0019441	0.0124283	0.00199375	0.0123064	0.00204503	0.0128939	0.00200174
																								0.0129514	0.00193042	0.0132514	0.00195866	0.0138557	0.00193218	0.0138513	0.00195048	0.011597	0.00205006	0.011897	0.00203481	0.0122642	0.00205047	0.0122418	0.00202939	0.0126866	0.00195501	0.0144684	0.00194405	0.0124194	0.00198608	0.012297	0.00203848	0.0128866	0.00199475
																								0.0131551	0.00193161	0.0134552	0.00196019	0.0140764	0.00193366	0.0140551	0.00195165	0.0116064	0.00204333	0.0119065	0.00202644	0.012272	0.00204365	0.0122502	0.00202281	0.0126939	0.00194813	0.0147401	0.00194529	0.0124283	0.0019785	0.0123064	0.00203198	0.0128939	0.00198782
																								0.0133539	0.00193392	0.013654	0.00196283	0.0142918	0.00193639	0.0142539	0.00195403	0.0116346	0.00203671	0.0119346	0.00201823	0.0122955	0.00203695	0.0122752	0.00201636	0.0127158	0.0019414	0.0150052	0.00194778	0.0124549	0.00197107	0.0123346	0.0020256	0.0129158	0.00198103
																								0.0135439	0.00193729	0.013844	0.00196652	0.0144976	0.00194032	0.0144439	0.00195757	0.0116812	0.00203026	0.0119812	0.00201024	0.0123344	0.00203043	0.0123166	0.0020101	0.0127521	0.00193488	0.0152585	0.00195149	0.0124989	0.00196385	0.0123812	0.00201938	0.0129521	0.00197442
																								0.0137213	0.00194168	0.0140214	0.00197119	0.0146898	0.00194537	0.0146213	0.00196222	0.0117459	0.00202402	0.0120459	0.00200255	0.0123883	0.00202415	0.0123741	0.00200407	0.0128025	0.00192863	0.0154951	0.00195634	0.0125601	0.0019569	0.0124459	0.00201338	0.0130024	0.00196806
																								0.0138828	0.00194698	0.0141829	0.00197676	0.0148647	0.00195145	0.0147828	0.00196787	0.0118281	0.00201806	0.0121282	0.00199522	0.0124568	0.00201815	0.0124472	0.00199833	0.0128664	0.0019227	0.0157103	0.00196223	0.0126377	0.00195029	0.0125281	0.00200765	0.0130664	0.00196199
																								0.0140251	0.00195311	0.0143252	0.00198311	0.0150189	0.00195843	0.0149251	0.00197442	0.0119271	0.00201242	0.0122272	0.00198832	0.0125393	0.0020125	0.0125353	0.00199294	0.0129435	0.00191713	0.0159001	0.00196905	0.0127313	0.00194407	0.0126271	0.00200224	0.0131434	0.00195628
																								0.0141455	0.00195993	0.0144456	0.00199011	0.0151494	0.00196618	0.0150455	0.00198174	0.0120421	0.00200715	0.0123422	0.0019819	0.0126352	0.00200723	0.0126375	0.00198792	0.0130329	0.00191199	0.0160607	0.00197666	0.0128399	0.00193829	0.0127421	0.0019972	0.0132329	0.00195096
																								0.0142417	0.00196732	0.0145418	0.00199765	0.0152535	0.00197455	0.0151417	0.00198969	0.0121721	0.0020023	0.0124723	0.00197602	0.0127435	0.0020024	0.0127531	0.00198334	0.0131341	0.0019073	0.0161889	0.00198493	0.0129627	0.001933	0.0128721	0.00199256	0.013334	0.00194608
																								0.0143118	0.00197513	0.0146118	0.00200555	0.0153294	0.00198338	0.0152118	0.00199811	0.012316	0.00199791	0.0126162	0.00197072	0.0128634	0.00199804	0.012881	0.00197922	0.013246	0.00190311	0.0162824	0.00199369	0.0130986	0.00192825	0.013016	0.00198837	0.0134459	0.0019417
																								0.0143544	0.00198321	0.0146544	0.00201368	0.0153756	0.00199249	0.0152544	0.00200684	0.0124726	0.00199401	0.0127727	0.00196606	0.0129939	0.00199419	0.0130202	0.0019756	0.0133678	0.00189946	0.0163391	0.00200276	0.0132465	0.00192408	0.0131726	0.00198466	0.0135677	0.00193783
																								0.0143686	0.0019914	0.0146686	0.00202188	0.015391	0.00200171	0.0152686	0.00201572	0.0126405	0.00199064	0.0129406	0.00196208	0.0131338	0.00199089	0.0131694	0.00197251	0.0134984	0.00189638	0.0163582	0.00201197	0.013405	0.00192052	0.0133405	0.00198147	0.0136983	0.00193452
																																0.0128182	0.00198783	0.0131184	0.0019588	0.013282	0.00198815	0.0133274	0.00196998	0.0136367	0.00189389			0.013573	0.00191761	0.0135182	0.00197882	0.0138366	0.0019318
																																0.0130044	0.00198561	0.0133046	0.00195626	0.0134371	0.00198602	0.0134929	0.00196804	0.0137815	0.00189202			0.0137488	0.00191537	0.0137044	0.00197673	0.0139814	0.00192968
																																0.0131973	0.00198398	0.0134975	0.00195447	0.0135979	0.0019845	0.0136644	0.00196669	0.0139316	0.00189078			0.013931	0.00191381	0.0138973	0.00197523	0.0141314	0.00192819
																																0.0133954	0.00198296	0.0136956	0.00195346	0.013763	0.00198361	0.0138405	0.00196595	0.0140856	0.00189018			0.0141181	0.00191295	0.0140954	0.00197432	0.0142855	0.00192734
																																0.0135969	0.00198257	0.0138972	0.00195323	0.0139309	0.00198335	0.0140196	0.00196582	0.0142424	0.00189023			0.0143084	0.00191281	0.0142969	0.00197402	0.0144423	0.00192713
																																0.0138002	0.00198281	0.0141004	0.00195378	0.0141003	0.00198372	0.0142003	0.00196631	0.0144005	0.00189092			0.0145004	0.00191337	0.0145002	0.00197432	0.0146004	0.00192757
																																0.0140035	0.00198367	0.0143037	0.00195511	0.0142697	0.00198474	0.014381	0.00196741	0.0145586	0.00189225			0.0146924	0.00191464	0.0147035	0.00197522	0.0147585	0.00192865
																																0.014205	0.00198515	0.0145052	0.0019572	0.0144376	0.00198637	0.0145601	0.00196911	0.0147153	0.00189422			0.0148827	0.0019166	0.014905	0.00197672	0.0149152	0.00193037
																																0.0144031	0.00198723	0.0147033	0.00196005	0.0146027	0.00198862	0.0147362	0.0019714	0.0148694	0.00189679			0.0150698	0.00191924	0.0151031	0.0019788	0.0150692	0.00193271
																																0.014596	0.0019899	0.0148962	0.00196362	0.0147635	0.00199146	0.0149077	0.00197426	0.0150194	0.00189996			0.015252	0.00192253	0.015296	0.00198144	0.0152193	0.00193564
																																0.0147821	0.00199313	0.0150823	0.00196788	0.0149186	0.00199487	0.0150731	0.00197766	0.0151642	0.00190369			0.0154277	0.00192645	0.0154821	0.00198463	0.0153641	0.00193916
																																0.0149599	0.0019969	0.0152601	0.0019728	0.0150667	0.00199881	0.0152311	0.00198158	0.0153024	0.00190795			0.0155956	0.00193097	0.0156599	0.00198834	0.0155023	0.00194321
																																0.0151277	0.00200117	0.0154279	0.00197834	0.0152066	0.00200327	0.0153803	0.00198598	0.015433	0.00191271			0.0157541	0.00193604	0.0158278	0.00199252	0.0156329	0.00194778
																																0.0152843	0.00200591	0.0155844	0.00198445	0.015337	0.00200818	0.0155195	0.00199082	0.0155547	0.00191792			0.015902	0.00194162	0.0159843	0.00199716	0.0157546	0.00195282
																																0.0154281	0.00201108	0.0157283	0.00199107	0.0154569	0.00201353	0.0156473	0.00199607	0.0156666	0.00192354			0.0160378	0.00194766	0.0161282	0.0020022	0.0158665	0.00195828
																																0.0155581	0.00201663	0.0158583	0.00199815	0.0155652	0.00201925	0.0157629	0.00200167	0.0157676	0.00192952			0.0161606	0.00195412	0.0162581	0.00200761	0.0159676	0.00196413
																																0.0156731	0.00202252	0.0159732	0.00200564	0.015661	0.0020253	0.0158651	0.00200758	0.015857	0.00193582			0.0162692	0.00196093	0.0163731	0.00201333	0.016057	0.00197031
																																0.0157721	0.00202869	0.0160722	0.00201346	0.0157435	0.00203163	0.015953	0.00201375	0.015934	0.00194237			0.0163626	0.00196805	0.0164721	0.00201933	0.016134	0.00197676
																																0.0158543	0.0020351	0.0161544	0.00202154	0.015812	0.00203819	0.0160261	0.00202013	0.0159979	0.00194912			0.0164402	0.0019754	0.0165543	0.00202555	0.0161979	0.00198345
																																0.0159189	0.00204168	0.016219	0.00202983	0.0158658	0.00204492	0.0160835	0.00202666	0.0160481	0.00195602			0.0165013	0.00198293	0.0166189	0.00203193	0.0162481	0.00199029
																																0.0159655	0.00204839	0.0162655	0.00203825	0.0159046	0.00205175	0.0161249	0.00203329	0.0160843	0.001963			0.0165452	0.00199057	0.0166655	0.00203842	0.0162843	0.00199725
																																0.0159936	0.00205516	0.0162936	0.00204672	0.015928	0.00205865	0.0161499	0.00203996	0.0161062	0.00197001			0.0165717	0.00199825	0.0166936	0.00204497	0.0163061	0.00200426
																																0.016003	0.00206194	0.016303	0.00205519	0.0159358	0.00206553	0.0161582	0.00204661	0.0161134	0.00197699			0.0165806	0.00200592	0.016703	0.00205152	0.0163134	0.00201125
[truncated: 2 more columns]

[truncated: 10 more sheets: PlotDat30, PlotDat45, PlotDat48, PlotDat6, PlotDat15, PlotDat22, PlotDat26, PlotDat27, PlotDat28, PlotDat29]
